# Supplementary material for: Competition and promotion of different mesophases in a series of novel unsymmetrical discotic dimers via subtle modification of spacers and peripheral side chains
Source: Royal Society of Chemistry journal article supplement (doi:10.1039/c6tc05120k), 2016-12-07
Supplement: c6tc05120k1.pdf [file c6tc05120k1.pdf]

***Supplementary Information for:***

**Competition and promotion of different  
mesophases in series of novel unsymmetrical  
discotic dimers via subtle modification of  
spacers and peripheral side chains**

*Xingtian Hao, Chunxiu Zhang,\* Jianchuang Wang, Wanying Zhang, Feng Hong,  
Shuafeng Zhang, Ao Zhang, Huanzhi Yang, Zhenhu Zhang, Yifei Wang, Hao Wu,  
and Jialing Pu*

Information Recording Materials Lab, Lab of Printing & Packaging Material and  
Technology, Beijing Institute of Graphic Communication, 102600 Beijing, China.

**Table of Contents**

1. Synthesis and characterization (page: 1-10)
2. <sup>1</sup>H-NMR and HRMS spectra (page: 11-38)
3. Mesomorphism (page: 39-50)

---

\* To whom correspondence should be addressed. Fax: +86-10-60261108; Tel: +86-10-60261110;  
E-mail: zhangchunxiu@bigc.edu.cn

## 1. Synthesis and characterization

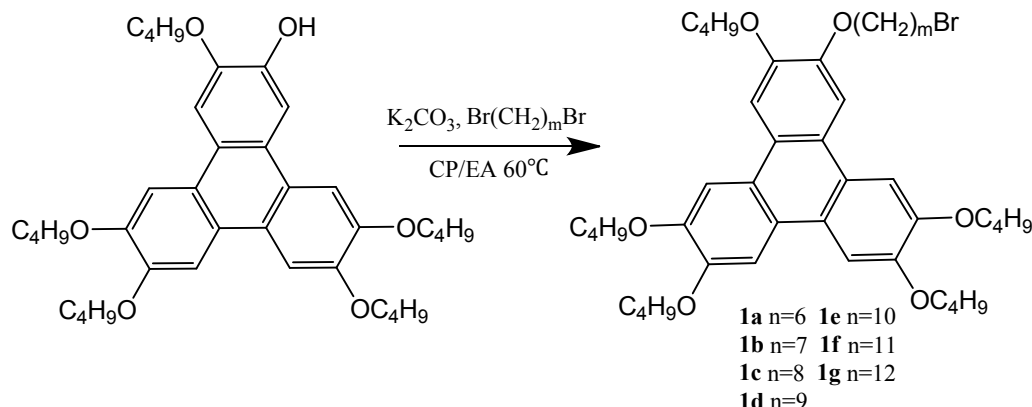

### 2-(6'-Bromoalkoxy)-3,6,7,10,11-pentabutoxytriphenylene (1a)

1.36g (49.98mmol) 1,6-dibromohexane and 0.5g (7.41mmol) **HAT4** are dissolved in 12ml acetone and stirred for 15h after addition of 0.6g (43.31mmol) potassium carbonate. After filtering and washing with dichloromethane the mixture is subjected to chromatography. (silica gel eluent  $CH_2Cl_2/PE=1:1$ ). Recrystallization from ethanol yields 0.3g (47%) pure product as a white solid. TLC  $R_f$ : 0.6 (dichloromethane-light petroleum 1:1); IR (KBr):  $\nu_{max}/cm^{-1}$  1255 (C-O-C);  $\delta_H$  (300MHZ,  $CDCl_3$ ) 8-7.8 (6H, s, ArH), 4.4-4.2 (12H, t,  $OCH_2$ ), 3.5 (2H, t,  $CH_2Br$ ), 2.1-1.90 (14H, m,  $OCH_2CH_2+CH_2CH_2Br$ ), 1.7-1.6 (14H, m,  $OCH_2CH_2CH_2+OCH_2CH_2(CH_2)_2CH_2CH_2Br$ ), 1.2-1.0 (15H, t,  $CH_3$ ).

### 2-(7'-Bromoalkoxy)-3,6,7,10,11-pentabutoxytriphenylene (1b)

1.44g (49.98mmol) 1,7-dibromoheptane and 0.5g (7.41mmol) **HAT4** are dissolved in 12ml acetone and stirred for 15h after addition of 0.6g (43.31mmol) potassium carbonate. After filtering and washing with dichloromethane the mixture is subjected to chromatography. (silica gel eluent  $CH_2Cl_2/PE=1:1$ ). Recrystallization from ethanol yields 0.3g (46%) pure product as a white solid. TLC  $R_f$ : 0.6 (dichloromethane-light petroleum 1:1); IR (KBr):  $\nu_{max}/cm^{-1}$  1254 (C-O-C);  $\delta_H$  (300MHZ,  $CDCl_3$ ) 8-7.8 (6H, s, ArH), 4.4-4.2 (12H, t,  $OCH_2$ ), 3.5 (2H, t,  $CH_2Br$ ), 2.1-1.90 (14H, m,  $OCH_2CH_2+CH_2CH_2Br$ ), 1.7-1.6 (16H, m,  $OCH_2CH_2CH_2+OCH_2CH_2(CH_2)_3CH_2CH_2Br$ ), 1.2-1.0 (15H, t,  $CH_3$ ).

### 2-(8'-Bromoalkoxy)-3,6,7,10,11-pentabutoxytriphenylene (1c)

1.52g (49.98mmol) 1,8-dibromooctane and 0.5g (7.41mmol) **HAT4** are dissolved in 12ml acetone and stirred for 15h after addition of 0.6g (43.31mmol) potassium carbonate. After filtering and washing with dichloromethane the mixture is subjected to chromatography. (silica gel eluent  $CH_2Cl_2/PE=1:1$ ). Recrystallization from ethanol yields 0.3g (45.5%) pure product as a white solid. TLC  $R_f$ : 0.6 (dichloromethane-light petroleum 1:1); IR (KBr):  $\nu_{max}/cm^{-1}$  1256 (C-O-C);  $\delta_H$  (300MHZ,  $CDCl_3$ ) 8-7.8 (6H, s, ArH), 4.4-4.2 (12H, t,  $OCH_2$ ), 3.5 (2H, t,  $CH_2Br$ ), 2.1-1.90 (14H, m,  $OCH_2CH_2+CH_2CH_2Br$ ), 1.7-1.5 (18H, m,  $OCH_2CH_2CH_2+OCH_2CH_2(CH_2)_4CH_2CH_2Br$ ), 1.2-1.0 (15H, t,  $CH_3$ ).

### 2-(9'-Bromoalkoxy)-3,6,7,10,11-pentabutoxytriphenylene (1d)

1.6g (49.98mmol) 1,9-dibromononane and 0.5g (7.41mmol) **HAT4** are dissolved in 12ml acetone and stirred for 15h after addition of 0.6g (43.31mmol) potassium carbonate. After filtering and washing with dichloromethane the mixture is subjected to chromatography. (silica gel eluent

CH<sub>2</sub>Cl<sub>2</sub>/PE=1:1). Recrystallization from ethanol yields 0.4g (60%) pure product as a white solid. TLC R<sub>f</sub>: 0.6 (dichloromethane-light petroleum 1:1); IR (KBr):  $\nu_{\max}/\text{cm}^{-1}$  1255 (C-O-C);  $\delta_{\text{H}}$  (300MHZ, CDCl<sub>3</sub>) 8-7.8 (6H, s, ArH), 4.4-4.2 (12H, t, OCH<sub>2</sub>), 3.5 (2H, t, CH<sub>2</sub>Br), 2.1-1.90 (14H, m, OCH<sub>2</sub>CH<sub>2</sub>+CH<sub>2</sub>CH<sub>2</sub>Br), 1.7-1.5 (20H, m, OCH<sub>2</sub>CH<sub>2</sub>CH<sub>2</sub>+OCH<sub>2</sub>CH<sub>2</sub>(CH<sub>2</sub>)<sub>5</sub>CH<sub>2</sub>CH<sub>2</sub>Br), 1.2-1.0 (15H, t, CH<sub>3</sub>).

### 2-(10'-Bromodecyloxy)-3,6,7,10,11-Pentabutoxytriphenylene (1e)

1.67g (49.98mmol) 1,10-dibromodecane and 0.5g(7.41mmol) **HAT4** are dissolved in 12ml acetone and stirred for 15h after addition of 0.6g (43.31mmol) potassium carbonate. After filtering and washing with dichloromethane the mixture is subjected to chromatography.(silica gel eluent CH<sub>2</sub>Cl<sub>2</sub>/PE=1:1). Recrystallization from ethanol yields 0.4g (58.8%) pure product as a white solid. TLC R<sub>f</sub>: 0.6 (dichloromethane-light petroleum 1:1); IR (KBr):  $\nu_{\max}/\text{cm}^{-1}$  1253 (C-O-C);  $\delta_{\text{H}}$  (300MHZ, CDCl<sub>3</sub>) 8-7.8 (6H, s, ArH), 4.4-4.2 (12H, t, OCH<sub>2</sub>), 3.5 (2H, t, CH<sub>2</sub>Br), 2.1-1.90 (14H, m, OCH<sub>2</sub>CH<sub>2</sub>+CH<sub>2</sub>CH<sub>2</sub>Br), 1.7-1.5 (22H, m, OCH<sub>2</sub>CH<sub>2</sub>CH<sub>2</sub>+OCH<sub>2</sub>CH<sub>2</sub>(CH<sub>2</sub>)<sub>6</sub>CH<sub>2</sub>CH<sub>2</sub>Br), 1.2-1.0 (15H, t, CH<sub>3</sub>).

### 2-(11'-Bromoundecyloxy)-3,6,7,10,11-Pentabutoxytriphenylene (1f)

1.75g (49.98mmol) 1,11-dibromoundecane and 0.5g (7.41mmol) **HAT4** are dissolved in 12ml acetone and stirred for 15h after addition of 0.6g (43.31mmol) potassium carbonate. After filtering and washing with dichloromethane the mixture is subjected to chromatography. (silica gel eluent CH<sub>2</sub>Cl<sub>2</sub>/PE=1:1). Recrystallization from ethanol yields 0.35g (51%) pure product as a white solid. TLC R<sub>f</sub>: 0.6 (dichloromethane-light petroleum 1:1); IR (KBr):  $\nu_{\max}/\text{cm}^{-1}$  1255 (C-O-C);  $\delta_{\text{H}}$  (300MHZ, CDCl<sub>3</sub>) 8-7.8 (6H, s, ArH), 4.4-4.2 (12H, t, OCH<sub>2</sub>), 3.5 (2H, t, CH<sub>2</sub>Br), 2.1-1.90 (14H, m, OCH<sub>2</sub>CH<sub>2</sub>+CH<sub>2</sub>CH<sub>2</sub>Br), 1.7-1.5 (24H, m, OCH<sub>2</sub>CH<sub>2</sub>CH<sub>2</sub>+OCH<sub>2</sub>CH<sub>2</sub>(CH<sub>2</sub>)<sub>7</sub>CH<sub>2</sub>CH<sub>2</sub>Br), 1.2-1.0 (15H, t, CH<sub>3</sub>).

### 2-(12'-Bromododecyloxy)-3,6,7,10,11-Pentabutoxytriphenylene (1g)

1.83g (49.98mmol) 1,12-dibromododecane and 0.5g (7.41mmol) **HAT4** are dissolved in 12ml acetone and stirred for 15h after addition of 0.6g (43.31mmol) potassium carbonate. After filtering and washing with dichloromethane the mixture is subjected to chromatography.(silica gel eluent CH<sub>2</sub>Cl<sub>2</sub>/PE=1:1). Recrystallization from ethanol yields 0.4g (57%) pure product as a white solid. TLC R<sub>f</sub>: 0.6 (dichloromethane-light petroleum 1:1); IR (KBr):  $\nu_{\max}/\text{cm}^{-1}$  1252 (C-O-C);  $\delta_{\text{H}}$  (300MHZ, CDCl<sub>3</sub>) 8-7.8 (6H, s, ArH), 4.4-4.2 (12H, t, OCH<sub>2</sub>), 3.5 (2H, t, CH<sub>2</sub>Br), 2.1-1.90 (14H, m, OCH<sub>2</sub>CH<sub>2</sub>+CH<sub>2</sub>CH<sub>2</sub>Br), 1.7-1.5 (26H, m, OCH<sub>2</sub>CH<sub>2</sub>CH<sub>2</sub>+OCH<sub>2</sub>CH<sub>2</sub>(CH<sub>2</sub>)<sub>8</sub>CH<sub>2</sub>CH<sub>2</sub>Br), 1.2-1.0 (15H, t, CH<sub>3</sub>).

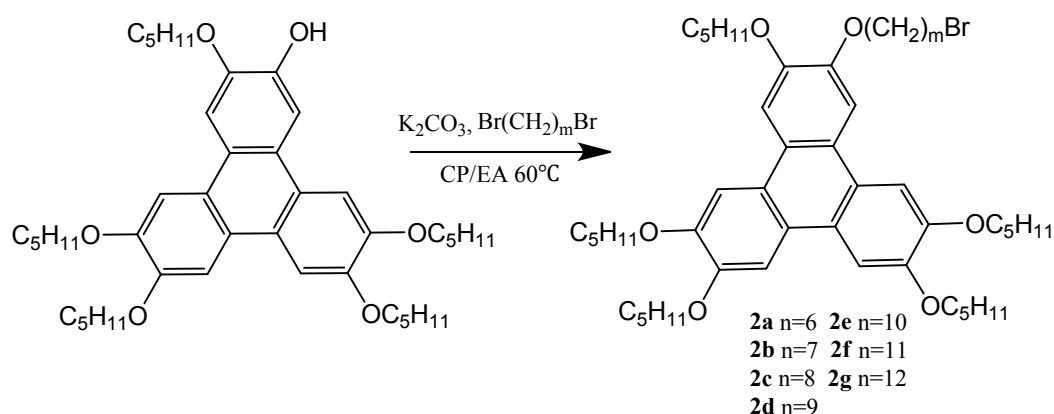

### 2-(6'-Bromoalkoxy)-3,6,7,10,11-Pentapentyloxytriphenylene (2a)

1.22g (49.98mmol) 1,6-dibromohexane and 0.5g(7.41mmol) **HAT5** are dissolved in 12ml acetone and stirred for 15h after addition of 0.6g (43.31mmol) potassium carbonate. After filtering and washing with dichloromethane the mixture is subjected to chromatography.(silica gel eluent CH<sub>2</sub>Cl<sub>2</sub>/PE=1;1). Recrystallization from ethanol yields 0.3g (48%) pure product as a white solid. TLC R<sub>f</sub>: 0.6 (dichloromethane-light petroleum 1:1); IR (KBr):  $\nu_{\max}/\text{cm}^{-1}$  1255 (C-O-C);  $\delta_{\text{H}}$  (300MHZ, CDCl<sub>3</sub>) 8-7.8 (6H, s, ArH), 4.4-4.2 (12H, t, OCH<sub>2</sub>), 3.5 (2H, t, CH<sub>2</sub>Br), 2.1-1.90 (14H, m, OCH<sub>2</sub>CH<sub>2</sub>+CH<sub>2</sub>CH<sub>2</sub>Br), 1.7-1.5 (24H, m, OCH<sub>2</sub>CH<sub>2</sub>(CH<sub>2</sub>)<sub>2</sub>+OCH<sub>2</sub>CH<sub>2</sub>(CH<sub>2</sub>)<sub>2</sub>CH<sub>2</sub>CH<sub>2</sub>Br), 1.2-1.0 (15H, t, CH<sub>3</sub>).

#### **2-(7'-Bromoheptyloxy)-3,6,7,10,11-Pentapentyloxytriphenylene (2b)**

1.29g (49.98mmol) 1,7-dibromoheptane and 0.5g(7.41mmol) **HAT5** are dissolved in 12ml acetone and stirred for 15h after addition of 0.6g (43.31mmol) potassium carbonate. After filtering and washing with dichloromethane the mixture is subjected to chromatography.(silica gel eluent CH<sub>2</sub>Cl<sub>2</sub>/PE=1;1). Recrystallization from ethanol yields 0.28g (44%) pure product as a white solid. TLC R<sub>f</sub>: 0.6 (dichloromethane-light petroleum 1:1); IR (KBr):  $\nu_{\max}/\text{cm}^{-1}$  1255 (C-O-C);  $\delta_{\text{H}}$  (300MHZ, CDCl<sub>3</sub>) 8-7.8 (6H, s, ArH), 4.4-4.2 (12H, t, OCH<sub>2</sub>), 3.5 (2H, t, CH<sub>2</sub>Br), 2.1-1.90 (14H, m, OCH<sub>2</sub>CH<sub>2</sub>+CH<sub>2</sub>CH<sub>2</sub>Br), 1.7-1.5 (26H, m, OCH<sub>2</sub>CH<sub>2</sub>(CH<sub>2</sub>)<sub>2</sub>+OCH<sub>2</sub>CH<sub>2</sub>(CH<sub>2</sub>)<sub>3</sub>CH<sub>2</sub>CH<sub>2</sub>Br), 1.2-1.0 (15H, t, CH<sub>3</sub>).

#### **2-(8'-Bromooctyloxy)-3,6,7,10,11-Pentapentyloxytriphenylene (2c)**

1.36g (49.98mmol) 1,8-dibromooctane and 0.5g(7.41mmol) **HAT5** are dissolved in 12ml acetone and stirred for 15h after addition of 0.6g (43.31mmol) potassium carbonate. After filtering and washing with dichloromethane the mixture is subjected to chromatography. (silica gel eluent CH<sub>2</sub>Cl<sub>2</sub>/PE=1;1). Recrystallization from ethanol yields 0.3g (47%) pure product as a white solid. TLC R<sub>f</sub>: 0.6 (dichloromethane-light petroleum 1:1); IR (KBr):  $\nu_{\max}/\text{cm}^{-1}$  1255 (C-O-C);  $\delta_{\text{H}}$  (300MHZ, CDCl<sub>3</sub>) 8-7.8 (6H, s, ArH), 4.4-4.2 (12H, t, OCH<sub>2</sub>), 3.5 (2H, t, CH<sub>2</sub>Br), 2.1-1.90 (14H, m, OCH<sub>2</sub>CH<sub>2</sub>+CH<sub>2</sub>CH<sub>2</sub>Br), 1.7-1.5 (28H, m, OCH<sub>2</sub>CH<sub>2</sub>(CH<sub>2</sub>)<sub>2</sub>+OCH<sub>2</sub>CH<sub>2</sub>(CH<sub>2</sub>)<sub>4</sub>CH<sub>2</sub>CH<sub>2</sub>Br), 1.2-1.0 (15H, t, CH<sub>3</sub>).

#### **2-(9'-Bromononyloxy)-3,6,7,10,11-Pentapentyloxytriphenylene (2d)**

1.43g (49.98mmol) 1,9-dibromononane and 0.5g (7.41mmol) **HAT5** are dissolved in 12ml acetone and stirred for 15h after addition of 0.6g (43.31mmol) potassium carbonate. After filtering and washing with dichloromethane the mixture is subjected to chromatography. (silica gel eluent CH<sub>2</sub>Cl<sub>2</sub>/PE=1;1). Recrystallization from ethanol yields 0.3g (46%) pure product as a white solid. TLC R<sub>f</sub>: 0.6 (dichloromethane-light petroleum 1:1); IR (KBr):  $\nu_{\max}/\text{cm}^{-1}$  1254 (C-O-C);  $\delta_{\text{H}}$  (300MHZ, CDCl<sub>3</sub>) 8-7.8 (6H, s, ArH), 4.4-4.2 (12H, t, OCH<sub>2</sub>), 3.5 (2H, t, CH<sub>2</sub>Br), 2.1-1.90 (14H, m, OCH<sub>2</sub>CH<sub>2</sub>+CH<sub>2</sub>CH<sub>2</sub>Br), 1.7-1.5 (30H, m, OCH<sub>2</sub>CH<sub>2</sub>(CH<sub>2</sub>)<sub>2</sub>+OCH<sub>2</sub>CH<sub>2</sub>(CH<sub>2</sub>)<sub>5</sub>CH<sub>2</sub>CH<sub>2</sub>Br), 1.2-1.0 (15H, t, CH<sub>3</sub>).

#### **2-(10'-Bromodecyloxy)-3,6,7,10,11-Pentapentyloxytriphenylene (2e)**

1.5g (49.98mmol) 1,10-dibromodecane and 0.5g (7.41mmol) **HAT5** are dissolved in 12ml acetone and stirred for 15h after addition of 0.6g (43.31mmol) potassium carbonate. After filtering and washing with dichloromethane the mixture is subjected to chromatography. (silica gel eluent CH<sub>2</sub>Cl<sub>2</sub>/PE=1;1). Recrystallization from ethanol yields 0.3g (45%) pure product as a white solid. TLC R<sub>f</sub>: 0.6 (dichloromethane-light petroleum 1:1); IR (KBr):  $\nu_{\max}/\text{cm}^{-1}$  1255 (C-O-C);  $\delta_{\text{H}}$  (300MHZ, CDCl<sub>3</sub>) 8-7.8 (6H, s, ArH), 4.4-4.2 (12H, t, OCH<sub>2</sub>), 3.5 (2H, t, CH<sub>2</sub>Br), 2.1-1.90 (14H, m, OCH<sub>2</sub>CH<sub>2</sub>+CH<sub>2</sub>CH<sub>2</sub>Br), 1.7-1.5 (32H, m, OCH<sub>2</sub>CH<sub>2</sub>(CH<sub>2</sub>)<sub>2</sub>+OCH<sub>2</sub>CH<sub>2</sub>(CH<sub>2</sub>)<sub>6</sub>CH<sub>2</sub>CH<sub>2</sub>Br), 1.2-1.0 (15H, t, CH<sub>3</sub>).

### 2-(11'-Bromoundecyloxy)-3,6,7,10,11-Pentapentyloxytriphenylene (2f)

1.57g (49.98mmol) 1,11-dibromoundecane and 0.5g (7.41mmol) **HAT5** are dissolved in 12ml acetone and stirred for 15h after addition of 0.6g (43.31mmol) potassium carbonate. After filtering and washing with dichloromethane the mixture is subjected to chromatography. (silica gel eluent  $\text{CH}_2\text{Cl}_2/\text{PE}=1:1$ ). Recrystallization from ethanol yields 0.32g (47%) pure product as a white solid. TLC  $R_f$ : 0.6 (dichloromethane-light petroleum 1:1); IR (KBr):  $\nu_{\text{max}}/\text{cm}^{-1}$  1255 (C-O-C);  $\delta_{\text{H}}$  (300MHZ,  $\text{CDCl}_3$ ) 8-7.8 (6H, s, ArH), 4.4-4.2 (12H, t,  $\text{OCH}_2$ ), 3.5 (2H, t,  $\text{CH}_2\text{Br}$ ), 2.1-1.90 (14H, m,  $\text{OCH}_2\text{CH}_2+\text{CH}_2\text{CH}_2\text{Br}$ ), 1.7-1.5 (34H, m,  $\text{OCH}_2\text{CH}_2(\text{CH}_2)_2+\text{OCH}_2\text{CH}_2(\text{CH}_2)_7\text{CH}_2\text{CH}_2\text{Br}$ ), 1.2-1.0 (15H, t,  $\text{CH}_3$ ).

### 2-(12'-Bromododecyloxy)-3,6,7,10,11-Pentapentyloxytriphenylene (2g)

1.64g (49.98mmol) 1,12-dibromododecane and 0.5g (7.41mmol) **HAT5** are dissolved in 12ml acetone and stirred for 15h after addition of 0.6g (43.31mmol) potassium carbonate. After filtering and washing with dichloromethane the mixture is subjected to chromatography. (silica gel eluent  $\text{CH}_2\text{Cl}_2/\text{PE}=1:1$ ). Recrystallization from ethanol yields 0.35g (51%) pure product as a white solid. TLC  $R_f$ : 0.6 (dichloromethane-light petroleum 1:1); IR (KBr):  $\nu_{\text{max}}/\text{cm}^{-1}$  1255 (C-O-C);  $\delta_{\text{H}}$  (300MHZ,  $\text{CDCl}_3$ ) 8-7.8 (6H, s, ArH), 4.4-4.2 (12H, t,  $\text{OCH}_2$ ), 3.5 (2H, t,  $\text{CH}_2\text{Br}$ ), 2.1-1.90 (14H, m,  $\text{OCH}_2\text{CH}_2+\text{CH}_2\text{CH}_2\text{Br}$ ), 1.7-1.5 (36H, m,  $\text{OCH}_2\text{CH}_2(\text{CH}_2)_2+\text{OCH}_2\text{CH}_2(\text{CH}_2)_8\text{CH}_2\text{CH}_2\text{Br}$ ), 1.2-1.0 (15H, t,  $\text{CH}_3$ ).

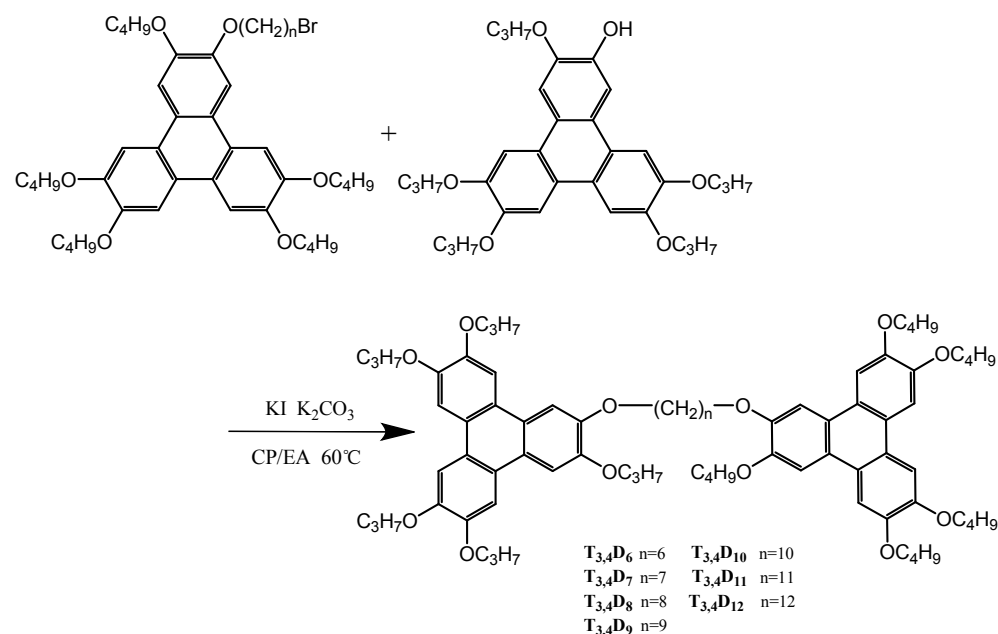

### 1-(3,6,7,10,11-pentapropoxytriphenylene-2-yloxy)-6-(3,6,7,10,11-pentabutoxytriphenylene-2-yloxy)-hexane ( $\text{T}_{3,4}\text{D}_6$ )

0.35g (2.22mmol) **HAT3** and 0.5g (2.24mmol) **1a** are dissolved in 15ml acetone under nitrogen. The mixture is refluxed for twenty hours after addition of 1.16g (28.94mmol) potassium carbonate and potassium iodide (50mg). Filtering and chromatography (eluent:  $\text{CH}_2\text{Cl}_2:\text{PE}=1:1$ ) and subsequent recrystallization from acetone yields 0.24 (30.2%) of the dimer as a white solid. TLC  $R_f$ : 0.6 (dichloromethane-light petroleum 1:1); (found: C 75.7; H 8.58.  $\text{C}_{77}\text{H}_{104}\text{O}_{12}$  requires: C, 75.8; H, 8.59%); IR (KBr):  $\nu_{\text{max}}/\text{cm}^{-1}$  1263 (C-O-C);  $\delta_{\text{H}}$  (300MHZ,  $\text{CDCl}_3$ ) 8-7.8 (12H, s, ArH), 4.4-4.2 (24H, t,  $\text{OCH}_2$ ), 2.1-1.90 (24H, m,  $\text{OCH}_2\text{CH}_2$ ), 1.7-1.35 (14H, m,  $\text{OCH}_2\text{CH}_2\text{CH}_2+\text{OCH}_2\text{CH}_2(\text{CH}_2)_2\text{CH}_2\text{CH}_2\text{O}$ ), 1.2-1.0 (30H, t,  $\text{CH}_3$ ), HRMS (ESI): calc.m/z 1220.7522

(C<sub>77</sub>H<sub>104</sub>O<sub>12</sub>), found m/z 1220.7518 (M)<sup>+</sup>

**1-(3,6,7,10,11-pentapropoxytriphenylene-2-yloxy)-7-(3,6,7,10,11-pentabutoxytriphenylene-2-yloxy)-heptane (T<sub>3,4</sub>D<sub>7</sub>)**

0.34g (2.22mmol) **HAT3** and 0.5g (2.24mmol) **1b** are dissolved in 15ml acetone under nitrogen. The mixture is refluxed for twenty hours after addition of 1.14g (28.94mmol) potassium carbonate and potassium iodide (50mg). Filtering and chromatography (eluent: CH<sub>2</sub>Cl<sub>2</sub>:PE=1:1) and subsequent recrystallization from acetone yields 0.25g (31.6%) of the dimer as a white solid. TLC R<sub>f</sub>: 0.6 (dichloromethane-light petroleum 1:1); (found: C 75.8; H 8.66. C<sub>78</sub>H<sub>106</sub>O<sub>12</sub> requires: C, 75.9; H, 8.65%); IR (KBr): ν<sub>max</sub>/cm<sup>-1</sup> 1263 (C-O-C); δ<sub>H</sub> (300MHZ, CDCl<sub>3</sub>) 8-7.8 (12H, s, ArH), 4.4-4.2 (24H, t, OCH<sub>2</sub>), 2.1-1.90 (24H, m, OCH<sub>2</sub>CH<sub>2</sub>), 1.7-1.35 (16H, m, OCH<sub>2</sub>CH<sub>2</sub>CH<sub>2</sub>+OCH<sub>2</sub>CH<sub>2</sub>(CH<sub>2</sub>)<sub>3</sub>CH<sub>2</sub>CH<sub>2</sub>O), 1.2-1.0 (30H, t, CH<sub>3</sub>), HRMS (ESI): calc.m/z 1234.7679 (C<sub>78</sub>H<sub>106</sub>O<sub>12</sub>), found m/z 1234.7679 (M)<sup>+</sup>

**1-(3,6,7,10,11-pentapropoxytriphenylene-2-yloxy)-8-(3,6,7,10,11-pentabutoxytriphenylene-2-yloxy)-octane (T<sub>3,4</sub>D<sub>8</sub>)**

0.33g (2.22mmol) **HAT3** and 0.5g (2.24mmol) **1c** are dissolved in 15ml acetone under nitrogen. The mixture is refluxed for twenty hours after addition of 1.12g (28.94mmol) potassium carbonate and potassium iodide (50mg). Filtering and chromatography (eluent:CH<sub>2</sub>Cl<sub>2</sub>:PE=1:1) and subsequent recrystallization from acetone yields 0.25 (31.8%) of the dimer as a white solid. TLC R<sub>f</sub>: 0.6 (dichloromethane-light petroleum 1:1); (found: C 75.96; H 8.72. C<sub>79</sub>H<sub>108</sub>O<sub>12</sub> requires: C, 75.98; H, 8.71%); IR (KBr): ν<sub>max</sub>/cm<sup>-1</sup> 1263 (C-O-C); δ<sub>H</sub> (300MHZ, CDCl<sub>3</sub>) 8-7.8 (12H, s, ArH), 4.4-4.2 (24H, t, OCH<sub>2</sub>), 2.1-1.90 (24H, m, OCH<sub>2</sub>CH<sub>2</sub>), 1.7-1.35 (18H, m, OCH<sub>2</sub>CH<sub>2</sub>CH<sub>2</sub>+OCH<sub>2</sub>CH<sub>2</sub>(CH<sub>2</sub>)<sub>4</sub>CH<sub>2</sub>CH<sub>2</sub>O), 1.2-1.0 (30H, t, CH<sub>3</sub>), HRMS (ESI): calc.m/z 1248.7834 (C<sub>79</sub>H<sub>108</sub>O<sub>12</sub>), found m/z 1248.7835 (M)<sup>+</sup>

**1-(3,6,7,10,11-pentapropoxytriphenylene-2-yloxy)-9-(3,6,7,10,11-pentabutoxytriphenylene-2-yloxy)-nonane (T<sub>3,4</sub>D<sub>9</sub>)**

0.327g (2.22mmol) **HAT3** and 0.5g (2.24mmol) **1d** are dissolved in 15ml acetone under nitrogen. The mixture is refluxed for twenty hours after addition of 1.1g (28.94mmol) potassium carbonate and potassium iodide (50mg). Filtering and chromatography (eluent: CH<sub>2</sub>Cl<sub>2</sub>:PE=1:1) and subsequent recrystallization from acetone yields 0.25g (32%) of the dimer as a white solid. TLC R<sub>f</sub>: 0.6 (dichloromethane-light petroleum 1:1); (found: C 75.9; H 8.76. C<sub>80</sub>H<sub>110</sub>O<sub>12</sub> requires: C, 76.1; H, 8.78%); IR (KBr): ν<sub>max</sub>/cm<sup>-1</sup> 1263 (C-O-C); δ<sub>H</sub> (300MHZ, CDCl<sub>3</sub>) 8-7.8 (12H, s, ArH), 4.4-4.2 (24H, t, OCH<sub>2</sub>), 2.1-1.90 (24H, m, OCH<sub>2</sub>CH<sub>2</sub>), 1.7-1.35 (20H, m, OCH<sub>2</sub>CH<sub>2</sub>CH<sub>2</sub>+OCH<sub>2</sub>CH<sub>2</sub>(CH<sub>2</sub>)<sub>5</sub>CH<sub>2</sub>CH<sub>2</sub>O), 1.2-1.0 (30H, t, CH<sub>3</sub>), HRMS (ESI): calc.m/z 1262.7990 (C<sub>80</sub>H<sub>110</sub>O<sub>12</sub>), found m/z 1262.7992 (M)<sup>+</sup>

**1-(3,6,7,10,11-pentapropoxytriphenylene-2-yloxy)-10-(3,6,7,10,11-pentabutoxytriphenylene-2-yloxy)-decane (T<sub>3,4</sub>D<sub>10</sub>)**

0.32g (2.22mmol) **HAT3** and 0.5g (2.24mmol) **1e** are dissolved in 15ml acetone under nitrogen. The mixture is refluxed for twenty hours after addition of 1.08g (28.94mmol) potassium carbonate and potassium iodide (50mg). Filtering and chromatography (eluent: CH<sub>2</sub>Cl<sub>2</sub>:PE=1:1) and subsequent recrystallization from acetone yields 0.26 (34%) of the dimer as a white solid. TLC R<sub>f</sub>: 0.6 (dichloromethane-light petroleum 1:1); (found: C 76.1; H 8.84. C<sub>81</sub>H<sub>112</sub>O<sub>12</sub> requires: C, 76.2; H, 8.84%); IR (KBr): ν<sub>max</sub>/cm<sup>-1</sup> 1263 (C-O-C); δ<sub>H</sub> (300MHZ, CDCl<sub>3</sub>) 8-7.8 (12H, s, ArH), 4.4-4.2 (24H, t, OCH<sub>2</sub>), 2.1-1.90 (24H, m, OCH<sub>2</sub>CH<sub>2</sub>), 1.7-1.35 (22H, m, OCH<sub>2</sub>CH<sub>2</sub>CH<sub>2</sub>+OCH<sub>2</sub>CH<sub>2</sub>(CH<sub>2</sub>)<sub>6</sub>CH<sub>2</sub>CH<sub>2</sub>O), 1.2-1.0 (30H, t, CH<sub>3</sub>), HRMS (ESI): calc.m/z 1276.8145

(C<sub>81</sub>H<sub>112</sub>O<sub>12</sub>), found m/z 1276.8148 (M)<sup>+</sup>

**1-(3,6,7,10,11-pentapropoxytriphenylene-2-yloxy)-11-(3,6,7,10,11-pentabutoxytriphenylen-2-yloxy)-undecane (T<sub>3,4</sub>D<sub>11</sub>)**

0.316g (2.22mmol) **HAT3** and 0.5g (2.24mmol) **1f** are dissolved in 15ml acetone under nitrogen. The mixture is refluxed for twenty hours after addition of 1.07g (28.94mmol) potassium carbonate and potassium iodide (50mg). Filtering and chromatography (eluent:CH<sub>2</sub>Cl<sub>2</sub>:PE=1:1) and subsequent recrystallization from acetone yields 0.26 (33.7%) of the dimer as a white solid. TLC R<sub>f</sub>: 0.6 (dichloromethane-light petroleum 1:1); (found: C 76.1; H 8.87. C<sub>82</sub>H<sub>114</sub>O<sub>12</sub> requires: C, 76.3; H, 8.9%); IR (KBr): ν<sub>max</sub>/cm<sup>-1</sup> 1263 (C-O-C); δ<sub>H</sub> (300MHZ, CDCl<sub>3</sub>) 8-7.8 (12H, s, ArH), 4.4-4.2 (24H, t, OCH<sub>2</sub>), 2.1-1.90 (24H, m, OCH<sub>2</sub>CH<sub>2</sub>), 1.7-1.35 (24H, m, OCH<sub>2</sub>CH<sub>2</sub>CH<sub>2</sub>+OCH<sub>2</sub>CH<sub>2</sub>(CH<sub>2</sub>)<sub>7</sub>CH<sub>2</sub>CH<sub>2</sub>O), 1.2-1.0 (30H, t, CH<sub>3</sub>), HRMS (ESI): calc.m/z 1290.8304 (C<sub>82</sub>H<sub>114</sub>O<sub>12</sub>), found m/z 1290.8305 (M)<sup>+</sup>

**1-(3,6,7,10,11-pentapropoxytriphenylene-2-yloxy)-12-(3,6,7,10,11-pentabutoxytriphenylen-2-yloxy)-dodecane (T<sub>3,4</sub>D<sub>12</sub>)**

0.31g (2.22mmol) **HAT3** and 0.5g (2.24mmol) **1g** are dissolved in 15ml acetone under nitrogen. The mixture is refluxed for twenty hours after addition of 1.05g (28.94mmol) potassium carbonate and potassium iodide (50mg). Filtering and chromatography (eluent: CH<sub>2</sub>Cl<sub>2</sub>:PE=1:1) and subsequent recrystallization from acetone yields 0.25 (32.6%) of the dimer as a white solid. TLC R<sub>f</sub>: 0.6 (dichloromethane-light petroleum 1:1); (found: C 76.3; H 8.94. C<sub>83</sub>H<sub>116</sub>O<sub>12</sub> requires: C, 76.4; H, 8.96%); IR (KBr): ν<sub>max</sub>/cm<sup>-1</sup> 1263 (C-O-C); δ<sub>H</sub> (300MHZ, CDCl<sub>3</sub>) 8-7.8 (12H, s, ArH), 4.4-4.2 (24H, t, OCH<sub>2</sub>), 2.1-1.90 (24H, m, OCH<sub>2</sub>CH<sub>2</sub>), 1.7-1.35 (26H, m, OCH<sub>2</sub>CH<sub>2</sub>CH<sub>2</sub>+OCH<sub>2</sub>CH<sub>2</sub>(CH<sub>2</sub>)<sub>8</sub>CH<sub>2</sub>CH<sub>2</sub>O), 1.2-1.0 (30H, t, CH<sub>3</sub>), HRMS (ESI): calc.m/z 1304.8461 (C<sub>83</sub>H<sub>116</sub>O<sub>12</sub>), found m/z 1304.8461 (M)<sup>+</sup>

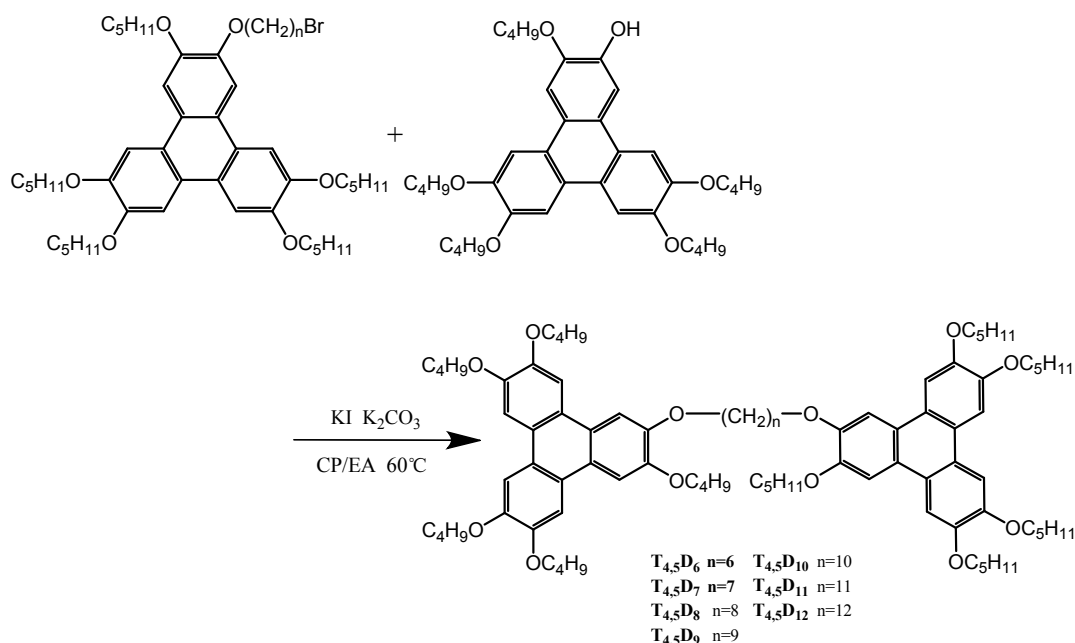

**1-(3,6,7,10,11-pentabutoxytriphenylene-2-yloxy)-6-(3,6,7,10,11-pentapentyloxytriphenylen-2-yloxy)-hexane (T<sub>4,5</sub>D<sub>6</sub>)**

0.358g (2.22mmol) **HAT4** and 0.5g (2.24mmol) **2a** are dissolved in 15ml acetone under nitrogen. The mixture is refluxed for twenty hours after addition of 1.07g (28.94mmol) potassium carbonate

and potassium iodide (50mg). Filtering and chromatography (eluent:CH<sub>2</sub>Cl<sub>2</sub>:PE=1:1) and subsequent recrystallization from acetone yields 0.31g (38%) of the dimer as a white solid. TLC R<sub>f</sub>: 0.6 (dichloromethane-light petroleum 1:1); (found: C 76.75; H 9.17. C<sub>87</sub>H<sub>124</sub>O<sub>12</sub> requires: C, 76.78; H, 9.18%); IR (KBr): ν<sub>max</sub>/cm<sup>-1</sup> 1263 (C-O-C); δ<sub>H</sub> (300MHZ, CDCl<sub>3</sub>) 8-7.8 (12H, s, ArH), 4.4-4.2 (24H, t, OCH<sub>2</sub>), 2.1-1.90 (24H, m, OCH<sub>2</sub>CH<sub>2</sub>), 1.7-1.35 (34H, m, OCH<sub>2</sub>CH<sub>2</sub>CH<sub>2</sub>+OCH<sub>2</sub>CH<sub>2</sub>(CH<sub>2</sub>)<sub>2</sub>CH<sub>2</sub>CH<sub>2</sub>O+OCH<sub>2</sub>CH<sub>2</sub>(CH<sub>2</sub>)<sub>2</sub>), 1.2-1.0 (30H, t, CH<sub>3</sub>), HRMS (ESI): calc.m/z 1360.9088 (C<sub>87</sub>H<sub>124</sub>O<sub>12</sub>), found m/z 1360.9087 (M)<sup>+</sup>

**1-(3,6,7,10,11-pentabutoxytriphenylene-2-yloxy)-7-(3,6,7,10,11-pentapentyloxytriphenylen-2-yloxy)-heptane (T<sub>4,5</sub>D<sub>7</sub>)**

0.35g (2.22mmol) HAT4 and 0.5g (2.24mmol) 2b are dissolved in 15ml acetone under nitrogen. The mixture is refluxed for twenty hours after addition of 1.05g (28.94mmol) potassium carbonate and potassium iodide (50mg). Filtering and chromatography (eluent:CH<sub>2</sub>Cl<sub>2</sub>:PE=1:1) and subsequent recrystallization from acetone yields 0.36g (45%) of the dimer as a white solid. TLC R<sub>f</sub>: 0.6 (dichloromethane-light petroleum 1:1); (found: C 76.84; H 9.22 C<sub>88</sub>H<sub>126</sub>O<sub>12</sub> requires: C, 76.87; H, 9.24%); IR (KBr): ν<sub>max</sub>/cm<sup>-1</sup> 1263 (C-O-C); δ<sub>H</sub> (300MHZ, CDCl<sub>3</sub>) 8-7.8 (12H, s, ArH), 4.4-4.2 (24H, t, OCH<sub>2</sub>), 2.1-1.90 (24H, m, OCH<sub>2</sub>CH<sub>2</sub>), 1.7-1.35 (36H, m, OCH<sub>2</sub>CH<sub>2</sub>CH<sub>2</sub>+OCH<sub>2</sub>CH<sub>2</sub>(CH<sub>2</sub>)<sub>3</sub>CH<sub>2</sub>CH<sub>2</sub>O+OCH<sub>2</sub>CH<sub>2</sub>(CH<sub>2</sub>)<sub>2</sub>), 1.2-1.0 (30H, t, CH<sub>3</sub>), HRMS (ESI): calc.m/z 1374.9247 (C<sub>88</sub>H<sub>126</sub>O<sub>12</sub>), found m/z 1374.9244 (M)<sup>+</sup>

**1-(3,6,7,10,11-pentabutoxytriphenylene-2-yloxy)-8-(3,6,7,10,11-pentapentyloxytriphenylen-2-yloxy)-octane (T<sub>4,5</sub>D<sub>8</sub>)**

0.35g (2.22mmol) HAT4 and 0.5g (2.24mmol) 2c are dissolved in 15ml acetone under nitrogen. The mixture is refluxed for twenty hours after addition of 1.03g (28.94mmol) potassium carbonate and potassium iodide (50mg). Filtering and chromatography (eluent:CH<sub>2</sub>Cl<sub>2</sub>:PE=1:1) and subsequent recrystallization from acetone yields 0.36g (45%) of the dimer as a white solid. TLC R<sub>f</sub>: 0.6 (dichloromethane-light petroleum 1:1); (found: C 76.94; H 9.27. C<sub>89</sub>H<sub>128</sub>O<sub>12</sub> requires: C, 76.96; H, 9.29%); IR (KBr): ν<sub>max</sub>/cm<sup>-1</sup> 1263 (C-O-C); δ<sub>H</sub> (300MHZ, CDCl<sub>3</sub>) 8-7.8 (12H, s, ArH), 4.4-4.2 (24H, t, OCH<sub>2</sub>), 2.1-1.90 (24H, m, OCH<sub>2</sub>CH<sub>2</sub>), 1.7-1.35 (38H, m, OCH<sub>2</sub>CH<sub>2</sub>CH<sub>2</sub>+OCH<sub>2</sub>CH<sub>2</sub>(CH<sub>2</sub>)<sub>4</sub>CH<sub>2</sub>CH<sub>2</sub>O+OCH<sub>2</sub>CH<sub>2</sub>(CH<sub>2</sub>)<sub>2</sub>), 1.2-1.0 (30H, t, CH<sub>3</sub>), HRMS (ESI): calc.m/z 1388.9403 (C<sub>89</sub>H<sub>128</sub>O<sub>12</sub>), found m/z 1388.9400 (M)<sup>+</sup>

**1-(3,6,7,10,11-pentabutoxytriphenylene-2-yloxy)-9-(3,6,7,10,11-pentapentyloxytriphenylen-2-yloxy)-nonane (T<sub>4,5</sub>D<sub>9</sub>)**

0.34g (2.22mmol) HAT4 and 0.5g (2.24mmol) 2d are dissolved in 15ml acetone under nitrogen. The mixture is refluxed for twenty hours after addition of 1.01g (28.94mmol) potassium carbonate and potassium iodide (50mg). Filtering and chromatography (eluent:CH<sub>2</sub>Cl<sub>2</sub>:PE=1:1) and subsequent recrystallization from acetone yields 0.36g (45%) of the dimer as a white solid. TLC R<sub>f</sub>: 0.6 (dichloromethane-light petroleum 1:1); (found: C 76.8; H 9.3. C<sub>90</sub>H<sub>130</sub>O<sub>12</sub> requires: C, 77.1; H, 9.34%); IR (KBr): ν<sub>max</sub>/cm<sup>-1</sup> 1263 (C-O-C); δ<sub>H</sub> (300MHZ, CDCl<sub>3</sub>) 8-7.8 (12H, s, ArH), 4.4-4.2 (24H, t, OCH<sub>2</sub>), 2.1-1.90 (24H, m, OCH<sub>2</sub>CH<sub>2</sub>), 1.7-1.35 (40H, m, OCH<sub>2</sub>CH<sub>2</sub>CH<sub>2</sub>+OCH<sub>2</sub>CH<sub>2</sub>(CH<sub>2</sub>)<sub>5</sub>CH<sub>2</sub>CH<sub>2</sub>O+OCH<sub>2</sub>CH<sub>2</sub>(CH<sub>2</sub>)<sub>2</sub>), 1.2-1.0 (30H, t, CH<sub>3</sub>), HRMS (ESI): calc.m/z 1402.9562 (C<sub>90</sub>H<sub>130</sub>O<sub>12</sub>), found m/z 1402.9557 (M)<sup>+</sup>

**1-(3,6,7,10,11-pentabutoxytriphenylene-2-yloxy)-10-(3,6,7,10,11-pentapentyloxytriphenylen-2-yloxy)-decane (T<sub>4,5</sub>D<sub>10</sub>)**

0.34g (2.22mmol) HAT4 and 0.5g (2.24mmol) 2e are dissolved in 15ml acetone under nitrogen. The mixture is refluxed for twenty hours after addition of 0.998g (28.94mmol) potassium carbonate



and potassium iodide (50mg). Filtering and chromatography (eluent:CH<sub>2</sub>Cl<sub>2</sub>:PE=1:1) and subsequent recrystallization from acetone yields 0.36g (45%) of the dimer as a white solid. TLC R<sub>f</sub>: 0.6 (dichloromethane-light petroleum 1:1); (found: C 77.05; H 9.32. C<sub>91</sub>H<sub>132</sub>O<sub>12</sub> requires: C, 77.14; H, 9.39%); IR (KBr): ν<sub>max</sub>/cm<sup>-1</sup> 1263 (C-O-C); δ<sub>H</sub> (300MHZ, CDCl<sub>3</sub>) 8-7.8 (12H, s, ArH), 4.4-4.2 (24H, t, OCH<sub>2</sub>), 2.1-1.90 (24H, m, OCH<sub>2</sub>CH<sub>2</sub>), 1.7-1.35 (42H, m, OCH<sub>2</sub>CH<sub>2</sub>CH<sub>2</sub>+OCH<sub>2</sub>CH<sub>2</sub>(CH<sub>2</sub>)<sub>6</sub>CH<sub>2</sub>CH<sub>2</sub>O+OCH<sub>2</sub>CH<sub>2</sub>(CH<sub>2</sub>)<sub>2</sub>), 1.2-1.0 (30H, t, CH<sub>3</sub>), HRMS (ESI): calc.m/z 1416.9713 (C<sub>91</sub>H<sub>132</sub>O<sub>12</sub>), found m/z 1416.9713 (M)<sup>+</sup>

**1-(3,6,7,10,11-pentabutoxytriphenylene-2-yloxy)-11-(3,6,7,10,11-pentapentyloxytriphenylen-2-yloxy)-undecane (T<sub>4,5</sub>D<sub>11</sub>)**

0.33g (2.22mmol) **HAT4** and 0.5g (2.24mmol) **2f** are dissolved in 15ml acetone under nitrogen. The mixture is refluxed for twenty hours after addition of 0.98g (28.94mmol) potassium carbonate and potassium iodide (50mg). Filtering and chromatography (eluent:CH<sub>2</sub>Cl<sub>2</sub>:PE=1:1) and subsequent recrystallization from acetone yields 0.35g (45%) of the dimer as a white solid. TLC R<sub>f</sub>: 0.6 (dichloromethane-light petroleum 1:1); (found: C 77.13; H 9.35. C<sub>92</sub>H<sub>134</sub>O<sub>12</sub> requires: C, 77.22; H, 9.44%); IR (KBr): ν<sub>max</sub>/cm<sup>-1</sup> 1263 (C-O-C); δ<sub>H</sub> (300MHZ, CDCl<sub>3</sub>) 8-7.8 (12H, s, ArH), 4.4-4.2 (24H, t, OCH<sub>2</sub>), 2.1-1.90 (24H, m, OCH<sub>2</sub>CH<sub>2</sub>), 1.7-1.35 (44H, m, OCH<sub>2</sub>CH<sub>2</sub>CH<sub>2</sub>+OCH<sub>2</sub>CH<sub>2</sub>(CH<sub>2</sub>)<sub>7</sub>CH<sub>2</sub>CH<sub>2</sub>O+OCH<sub>2</sub>CH<sub>2</sub>(CH<sub>2</sub>)<sub>2</sub>), 1.2-1.0 (30H, t, CH<sub>3</sub>), HRMS (ESI): calc.m/z 1430.9877 (C<sub>92</sub>H<sub>134</sub>O<sub>12</sub>), found m/z 1430.9870 (M)<sup>+</sup>

**1-(3,6,7,10,11-pentabutoxytriphenylene-2-yloxy)-12-(3,6,7,10,11-pentapentyloxytriphenylen-2-yloxy)-dodecane (T<sub>4,5</sub>D<sub>12</sub>)**

0.33g (2.22mmol) **HAT4** and 0.5g (2.24mmol) **2g** are dissolved in 15ml acetone under nitrogen. The mixture is refluxed for twenty hours after addition of 0.97g (28.94mmol) potassium carbonate and potassium iodide (50mg). Filtering and chromatography (eluent:CH<sub>2</sub>Cl<sub>2</sub>:PE=1:1) and subsequent recrystallization from acetone yields 0.35g (45%) of the dimer as a white solid. TLC R<sub>f</sub>: 0.6 (dichloromethane-light petroleum 1:1); (found: C 77.1; H 9.43. C<sub>93</sub>H<sub>136</sub>O<sub>12</sub> requires: C, 77.3; H, 9.49%); IR (KBr): ν<sub>max</sub>/cm<sup>-1</sup> 1263 (C-O-C); δ<sub>H</sub> (300MHZ, CDCl<sub>3</sub>) 8-7.8 (12H, s, ArH), 4.4-4.2 (24H, t, OCH<sub>2</sub>), 2.1-1.90 (24H, m, OCH<sub>2</sub>CH<sub>2</sub>), 1.7-1.35 (46H, m, OCH<sub>2</sub>CH<sub>2</sub>CH<sub>2</sub>+OCH<sub>2</sub>CH<sub>2</sub>(CH<sub>2</sub>)<sub>8</sub>CH<sub>2</sub>CH<sub>2</sub>O+OCH<sub>2</sub>CH<sub>2</sub>(CH<sub>2</sub>)<sub>2</sub>), 1.2-1.0 (30H, t, CH<sub>3</sub>), HRMS (ESI): calc.m/z 1445.0021 (C<sub>93</sub>H<sub>136</sub>O<sub>12</sub>), found m/z 1445.0027 (M)<sup>+</sup>

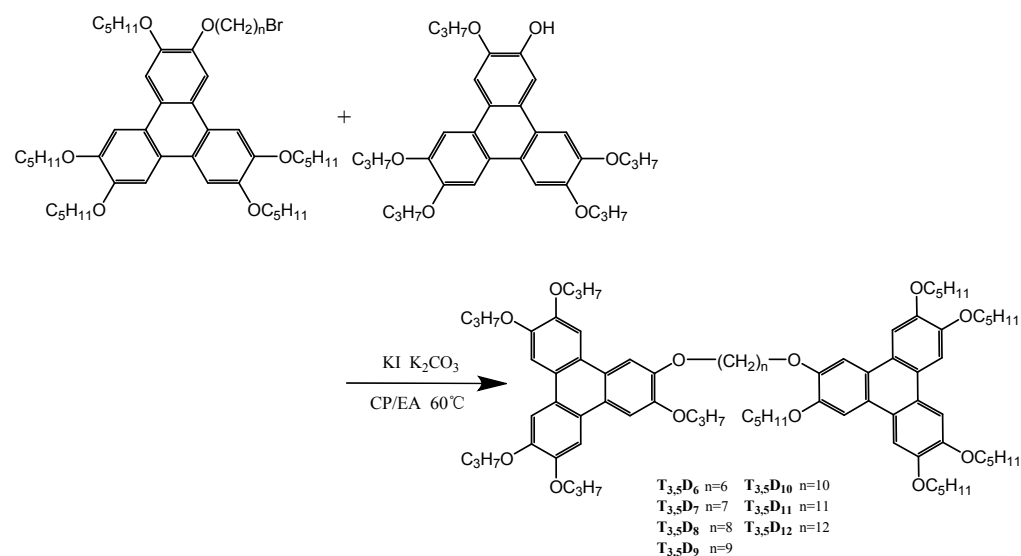

**1-(3,6,7,10,11-pentapropoxytriphenylene-2-yloxy)-6-(3,6,7,10,11-pentapentyloxytriphenylene-2-yloxy)-hexane (T<sub>3,5</sub>D<sub>6</sub>)**

0.32g (2.22mmol) **HAT3** and 0.5g (2.24mmol) **2a** are dissolved in 15ml acetone under nitrogen. The mixture is refluxed for twenty hours after addition of 1.07g (28.94mmol) potassium carbonate and potassium iodide (50mg). Filtering and chromatography (eluent: CH<sub>2</sub>Cl<sub>2</sub>:PE=1:1) and subsequent recrystallization from acetone yields 0.25g (32%) of the dimer as a white solid. TLC R<sub>f</sub>: 0.6 (dichloromethane-light petroleum 1:1); Found: C, 76.17; H, 8.94. C<sub>82</sub>H<sub>114</sub>O<sub>12</sub> requires: C, 76.24; H, 8.90%; IR (KBr): ν<sub>max</sub>/cm<sup>-1</sup> 1263 (C-O-C); δ<sub>H</sub> (300MHZ, CDCl<sub>3</sub>) 8-7.8 (12H, s, ArH), 4.4-4.2 (24H, t, OCH<sub>2</sub>), 2.1-1.90 (24H, m, OCH<sub>2</sub>CH<sub>2</sub>), 1.7-1.35 (24H, m, OCH<sub>2</sub>CH<sub>2</sub>CH<sub>2</sub>CH<sub>2</sub>+OCH<sub>2</sub>CH<sub>2</sub>(CH<sub>2</sub>)<sub>2</sub>CH<sub>2</sub>CH<sub>2</sub>O), 1.2-1.0 (30H, t, CH<sub>3</sub>), HRMS (ESI): calc.m/z 1290.8307 (C<sub>82</sub>H<sub>114</sub>O<sub>12</sub>), found m/z 1290.8305 (M)<sup>+</sup>

**1-(3,6,7,10,11-pentapropoxytriphenylene-2-yloxy)-7-(3,6,7,10,11-pentapentyloxytriphenylene-2-yloxy)-heptane (T<sub>3,5</sub>D<sub>7</sub>)**

0.31g (2.22mmol) **HAT3** and 0.5g (2.24mmol) **2b** are dissolved in 15ml acetone under nitrogen. The mixture is refluxed for twenty hours after addition of 1.05g (28.94mmol) potassium carbonate and potassium iodide (50mg). Filtering and chromatography (eluent: CH<sub>2</sub>Cl<sub>2</sub>:PE=1:1) and subsequent recrystallization from acetone yields 0.3g (39%) of the dimer as a white solid. TLC R<sub>f</sub>: 0.6 (dichloromethane-light petroleum 1:1); Found: C, 76.26; H, 9.02. C<sub>83</sub>H<sub>116</sub>O<sub>12</sub> requires: C, 76.34; H, 8.95%; IR (KBr): ν<sub>max</sub>/cm<sup>-1</sup> 1263 (C-O-C); δ<sub>H</sub> (300MHZ, CDCl<sub>3</sub>) 8-7.8 (12H, s, ArH), 4.4-4.2 (24H, t, OCH<sub>2</sub>), 2.1-1.90 (24H, m, OCH<sub>2</sub>CH<sub>2</sub>), 1.7-1.35 (26H, m, OCH<sub>2</sub>CH<sub>2</sub>CH<sub>2</sub>CH<sub>2</sub>+OCH<sub>2</sub>CH<sub>2</sub>(CH<sub>2</sub>)<sub>3</sub>CH<sub>2</sub>CH<sub>2</sub>O), 1.2-1.0 (30H, t, CH<sub>3</sub>), HRMS (ESI): calc.m/z 1304.8462 (C<sub>83</sub>H<sub>116</sub>O<sub>12</sub>), found m/z 1304.8461 (M)<sup>+</sup>

**1-(3,6,7,10,11-pentapropoxytriphenylene-2-yloxy)-8-(3,6,7,10,11-pentapentyloxytriphenylene-2-yloxy)-octane (T<sub>3,5</sub>D<sub>8</sub>)**

0.31g (2.22mmol) **HAT3** and 0.5g (2.24mmol) **2c** are dissolved in 15ml acetone under nitrogen. The mixture is refluxed for twenty hours after addition of 1.03g (28.94mmol) potassium carbonate and potassium iodide (50mg). Filtering and chromatography (eluent: CH<sub>2</sub>Cl<sub>2</sub>:PE=1:1) and subsequent recrystallization from acetone yields 0.3g (39%) of the dimer as a white solid. TLC R<sub>f</sub>: 0.6 (dichloromethane-light petroleum 1:1); Found: C, 76.38; H, 8.95. C<sub>84</sub>H<sub>118</sub>O<sub>12</sub> requires: C, 76.44; H, 9.01%; IR (KBr): ν<sub>max</sub>/cm<sup>-1</sup> 1263 (C-O-C); δ<sub>H</sub> (300MHZ, CDCl<sub>3</sub>) 8-7.8 (12H, s, ArH), 4.4-4.2 (24H, t, OCH<sub>2</sub>), 2.1-1.90 (24H, m, OCH<sub>2</sub>CH<sub>2</sub>), 1.7-1.35 (28H, m, OCH<sub>2</sub>CH<sub>2</sub>CH<sub>2</sub>CH<sub>2</sub>+OCH<sub>2</sub>CH<sub>2</sub>(CH<sub>2</sub>)<sub>4</sub>CH<sub>2</sub>CH<sub>2</sub>O), 1.2-1.0 (30H, t, CH<sub>3</sub>), HRMS (ESI): calc.m/z 1318.8608 (C<sub>84</sub>H<sub>118</sub>O<sub>12</sub>), found m/z 1318.8618 (M)<sup>+</sup>

**1-(3,6,7,10,11-pentapropoxytriphenylene-2-yloxy)-9-(3,6,7,10,11-pentapentyloxytriphenylene-2-yloxy)-nonane (T<sub>3,5</sub>D<sub>9</sub>)**

0.3g (2.22mmol) **HAT3** and 0.5g (2.24mmol) **2d** are dissolved in 15ml acetone under nitrogen. The mixture is refluxed for twenty hours after addition of 1.01g (28.94mmol) potassium carbonate and potassium iodide (50mg). Filtering and chromatography (eluent: CH<sub>2</sub>Cl<sub>2</sub>:PE=1:1) and subsequent recrystallization from acetone yields 0.3g (40%) of the dimer as a white solid. TLC R<sub>f</sub>: 0.6 (dichloromethane-light petroleum 1:1); Found: C, 76.57; H, 9.0. C<sub>85</sub>H<sub>120</sub>O<sub>12</sub> requires: C, 76.54; H, 9.07%; IR (KBr): ν<sub>max</sub>/cm<sup>-1</sup> 1263 (C-O-C); δ<sub>H</sub> (300MHZ, CDCl<sub>3</sub>) 8-7.8 (12H, s, ArH), 4.4-4.2 (24H, t, OCH<sub>2</sub>), 2.1-1.90 (24H, m, OCH<sub>2</sub>CH<sub>2</sub>), 1.7-1.35 (30H, m, OCH<sub>2</sub>CH<sub>2</sub>CH<sub>2</sub>CH<sub>2</sub>+OCH<sub>2</sub>CH<sub>2</sub>(CH<sub>2</sub>)<sub>5</sub>CH<sub>2</sub>CH<sub>2</sub>O), 1.2-1.0 (30H, t, CH<sub>3</sub>), HRMS (ESI): calc.m/z 1332.8750 (C<sub>85</sub>H<sub>120</sub>O<sub>12</sub>), found m/z 1332.8774 (M)<sup>+</sup>

**1-(3,6,7,10,11-pentapropoxytriphenylene-2-yloxy)-10-(3,6,7,10,11-pentapentyloxytriphenylen-2-yloxy)-decane (T<sub>3,5</sub>D<sub>10</sub>)**

0.3g (2.22mmol) **HAT3** and 0.5g (2.24mmol) **2e** are dissolved in 15ml acetone under nitrogen. The mixture is refluxed for twenty hours after addition of 0.998g (28.94mmol) potassium carbonate and potassium iodide (50mg). Filtering and chromatography (eluent: CH<sub>2</sub>Cl<sub>2</sub>:PE=1:1) and subsequent recrystallization from acetone yields 0.26g (35%) of the dimer as a white solid. TLC R<sub>f</sub>: 0.6 (dichloromethane-light petroleum 1:1); (Found: C, 76.52; H, 9.09. C<sub>86</sub>H<sub>122</sub>O<sub>12</sub> requires: C, 76.63; H, 9.12%); IR (KBr):  $\nu_{\max}/\text{cm}^{-1}$  1263 (C-O-C);  $\delta_{\text{H}}$  (300MHZ, CDCl<sub>3</sub>) 8-7.8 (12H, s, ArH), 4.4-4.2 (24H, t, OCH<sub>2</sub>), 2.1-1.90 (24H, m, OCH<sub>2</sub>CH<sub>2</sub>), 1.7-1.35 (32H, m, OCH<sub>2</sub>CH<sub>2</sub>CH<sub>2</sub>CH<sub>2</sub>+OCH<sub>2</sub>CH<sub>2</sub>(CH<sub>2</sub>)<sub>6</sub>CH<sub>2</sub>CH<sub>2</sub>O), 1.2-1.0 (30H, t, CH<sub>3</sub>), HRMS (ESI): calc.m/z 1346.8938 (C<sub>86</sub>H<sub>122</sub>O<sub>12</sub>), found m/z 1346.8931 (M)<sup>+</sup>

**1-(3,6,7,10,11-pentapropoxytriphenylene-2-yloxy)-11-(3,6,7,10,11-pentapentyloxytriphenylen-2-yloxy)-undecane (T<sub>3,5</sub>D<sub>11</sub>)**

0.29g (2.22mmol) **HAT3** and 0.5g (2.24mmol) **2f** are dissolved in 15ml acetone under nitrogen. The mixture is refluxed for twenty hours after addition of 0.98g (28.94mmol) potassium carbonate and potassium iodide (50mg). Filtering and chromatography (eluent: CH<sub>2</sub>Cl<sub>2</sub>:PE=1:1) and subsequent recrystallization from acetone yields 0.26g (35%) of the dimer as a white solid. TLC R<sub>f</sub>: 0.6 (dichloromethane-light petroleum 1:1); (Found: C, 76.55; H, 9.15. C<sub>87</sub>H<sub>124</sub>O<sub>12</sub> requires: C, 76.73; H, 9.18%); IR (KBr):  $\nu_{\max}/\text{cm}^{-1}$  1263 (C-O-C);  $\delta_{\text{H}}$  (300MHZ, CDCl<sub>3</sub>) 8-7.8 (12H, s, ArH), 4.4-4.2 (24H, t, OCH<sub>2</sub>), 2.1-1.90 (24H, m, OCH<sub>2</sub>CH<sub>2</sub>), 1.7-1.35 (34H, m, OCH<sub>2</sub>CH<sub>2</sub>CH<sub>2</sub>CH<sub>2</sub>+OCH<sub>2</sub>CH<sub>2</sub>(CH<sub>2</sub>)<sub>7</sub>CH<sub>2</sub>CH<sub>2</sub>O), 1.2-1.0 (30H, t, CH<sub>3</sub>), HRMS (ESI): calc.m/z 1360.9083 (C<sub>87</sub>H<sub>124</sub>O<sub>12</sub>), found m/z 1360.9087 (M)<sup>+</sup>

**1-(3,6,7,10,11-pentapropoxytriphenylene-2-yloxy)-12-(3,6,7,10,11-pentapentyloxytriphenylen-2-yloxy)-dodecane (T<sub>3,5</sub>D<sub>12</sub>)**

0.29g (2.22mmol) **HAT3** and 0.5g (2.24mmol) **2g** are dissolved in 15ml acetone under nitrogen. The mixture is refluxed for twenty hours after addition of 0.97g (28.94mmol) potassium carbonate and potassium iodide (50mg). Filtering and chromatography (eluent: CH<sub>2</sub>Cl<sub>2</sub>:PE=1:1) and subsequent recrystallization from acetone yields 0.26g (35%) of the dimer as a white solid. TLC R<sub>f</sub>: 0.6 (dichloromethane-light petroleum 1:1); (Found: C, 76.54; H, 9.10. C<sub>88</sub>H<sub>126</sub>O<sub>12</sub> requires: C, 76.82; H, 9.23%); IR (KBr):  $\nu_{\max}/\text{cm}^{-1}$  1263 (C-O-C);  $\delta_{\text{H}}$  (300MHZ, CDCl<sub>3</sub>) 8-7.8 (12H, s, ArH), 4.4-4.2 (24H, t, OCH<sub>2</sub>), 2.1-1.90 (24H, m, OCH<sub>2</sub>CH<sub>2</sub>), 1.7-1.35 (36H, m, OCH<sub>2</sub>CH<sub>2</sub>CH<sub>2</sub>CH<sub>2</sub>+OCH<sub>2</sub>CH<sub>2</sub>(CH<sub>2</sub>)<sub>8</sub>CH<sub>2</sub>CH<sub>2</sub>O), 1.2-1.0 (30H, t, CH<sub>3</sub>), HRMS (ESI): calc.m/z 1374.9247 (C<sub>88</sub>H<sub>126</sub>O<sub>12</sub>), found m/z 1374.9244 (M)<sup>+</sup>

## 2 <sup>1</sup>H-NMR and HRMS spectra

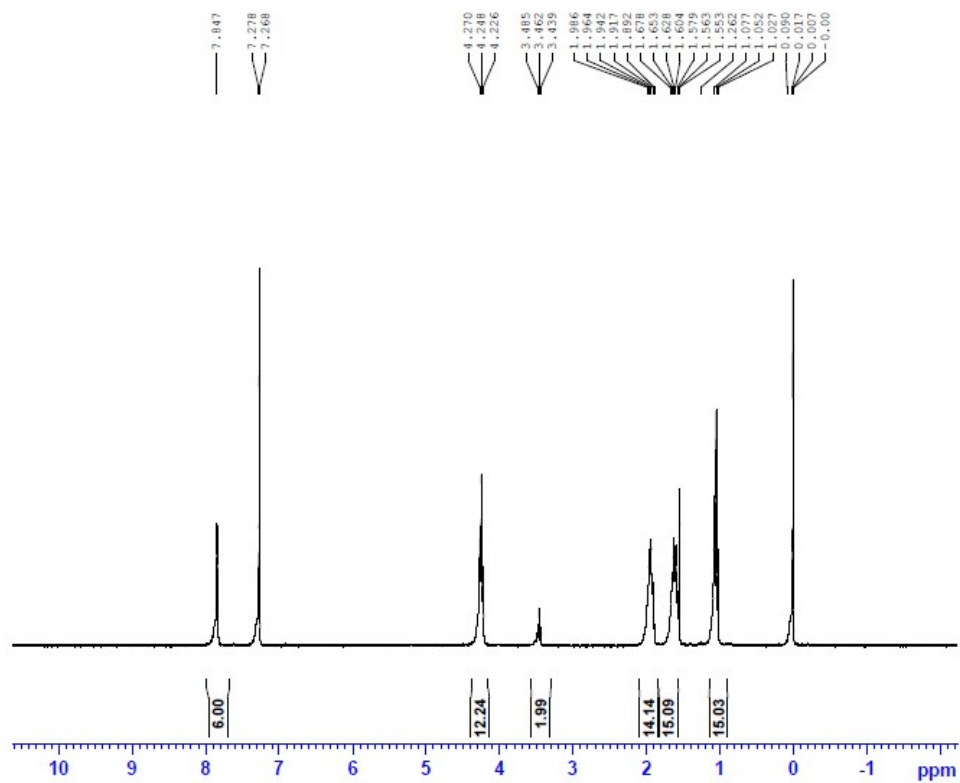

Fig.S1 <sup>1</sup>HNMR spectra of 1a

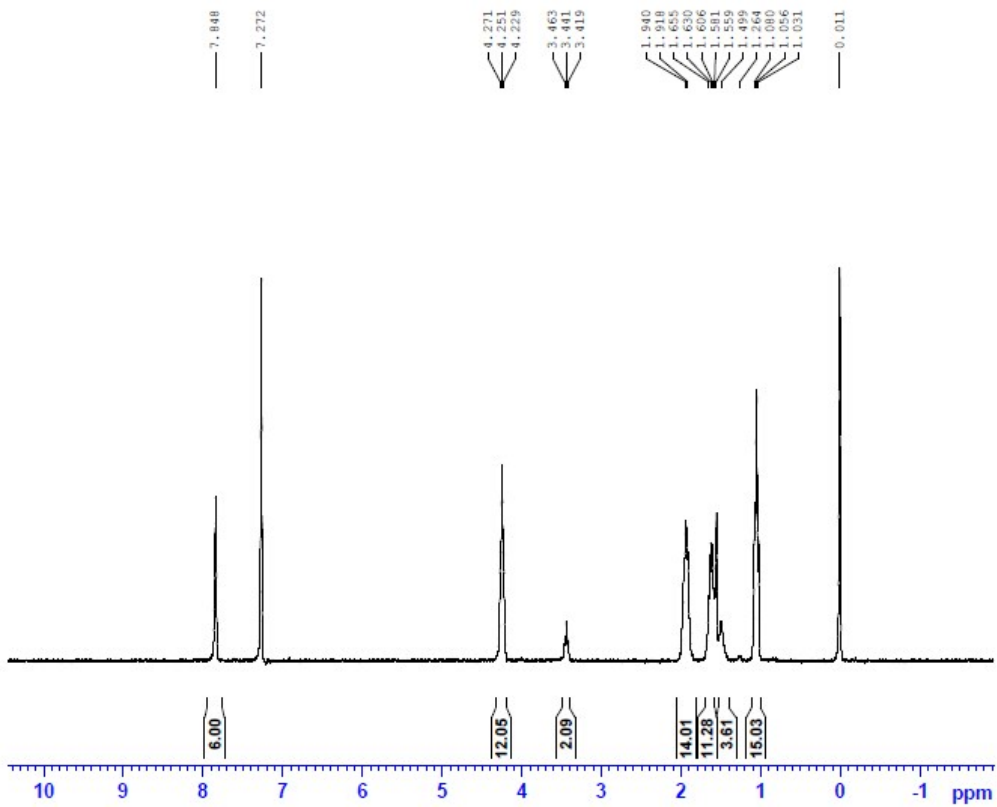

Fig.S2 <sup>1</sup>HNMR spectra of 1b

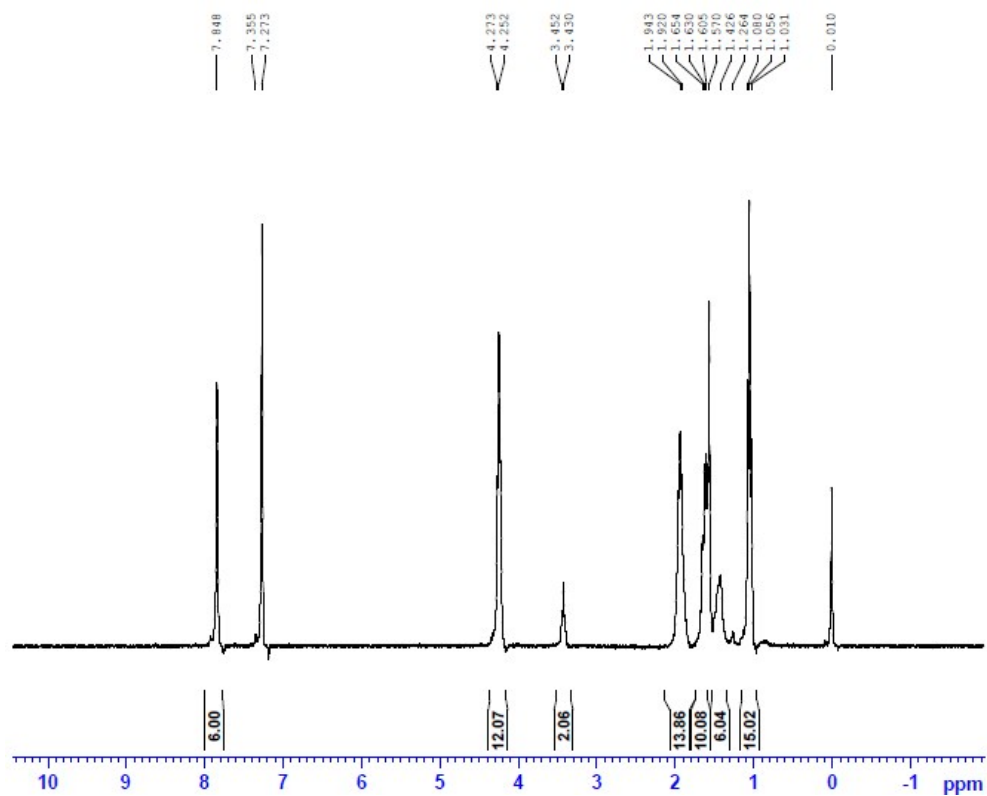

Fig.S3 <sup>1</sup>H NMR spectra of 1c

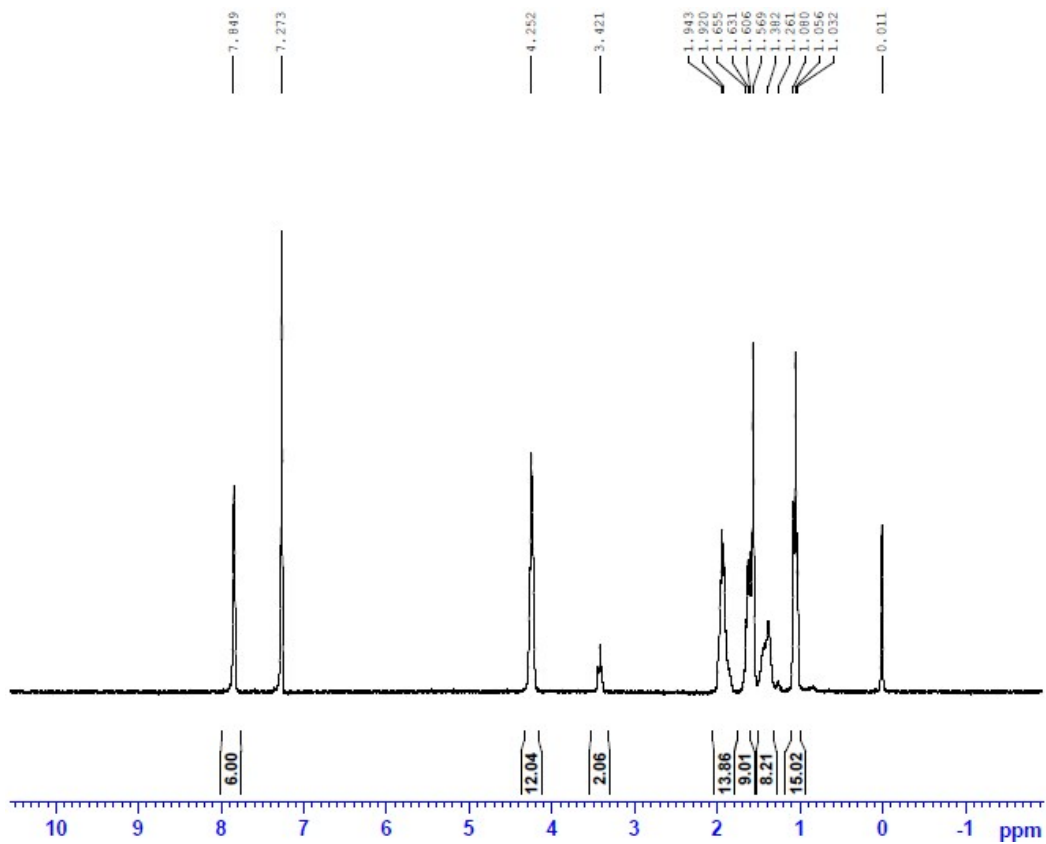

Fig.S4 <sup>1</sup>H NMR spectra of 1d

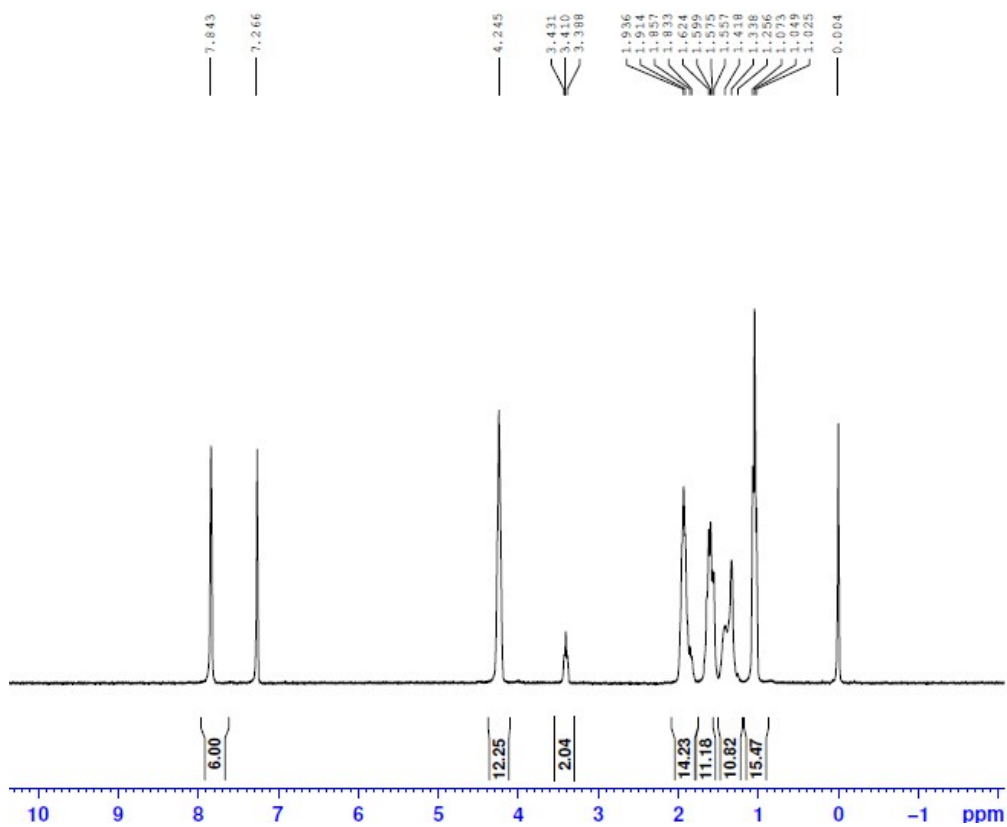

Fig.S5 <sup>1</sup>H NMR spectra of 1e

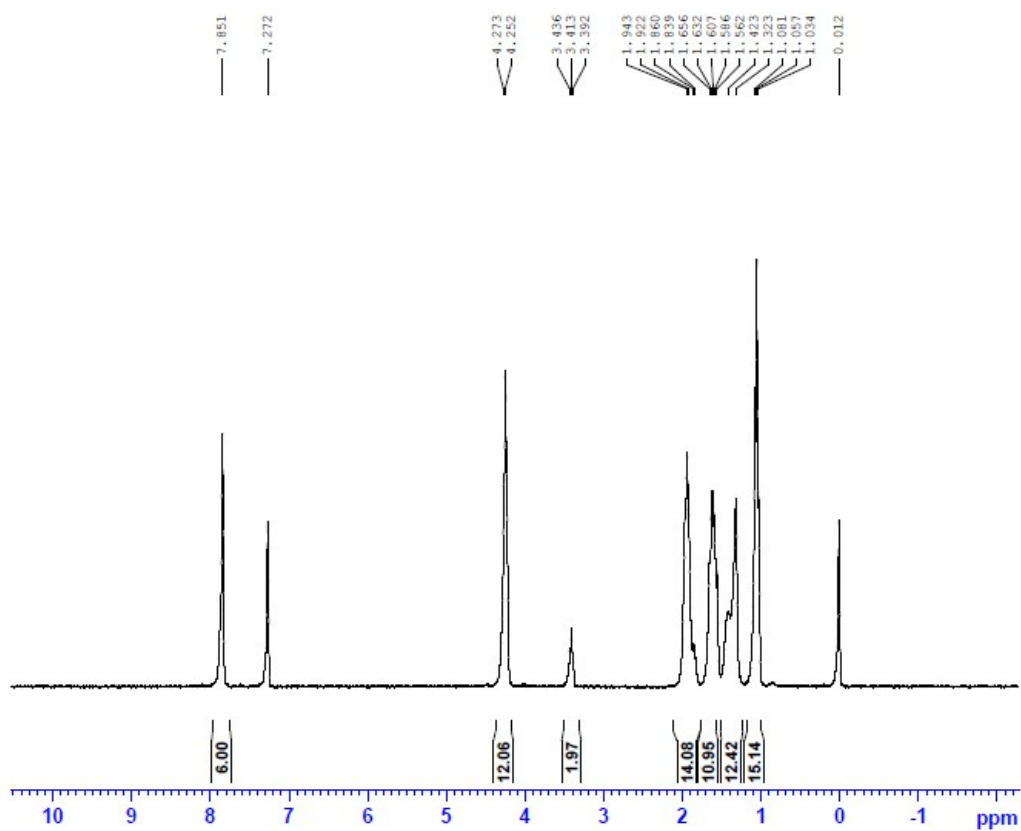

Fig.S6 <sup>1</sup>H NMR spectra of 1f

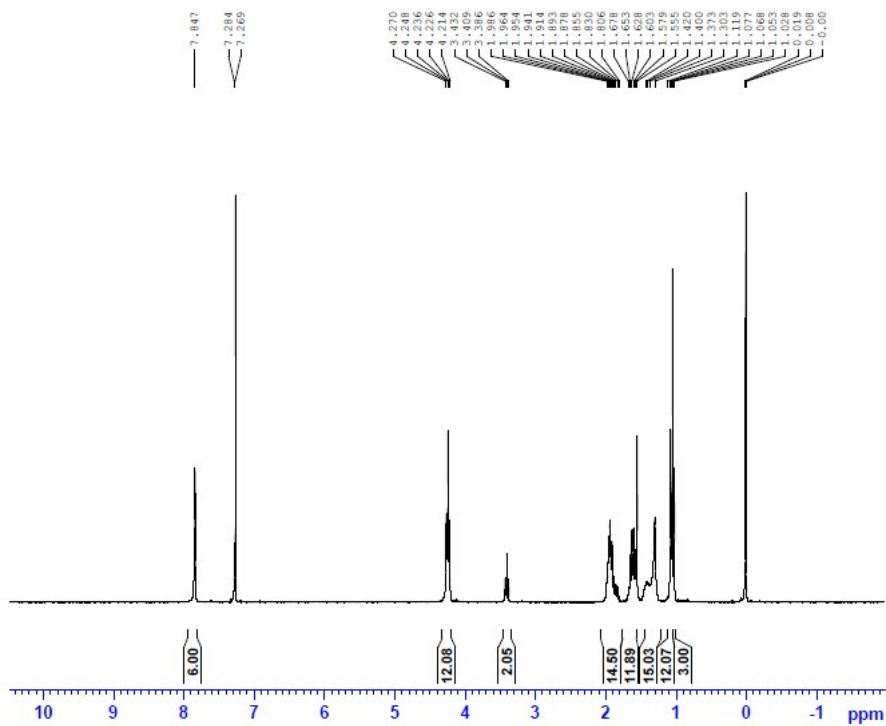

Fig.S7 <sup>1</sup>H NMR spectra of 1g

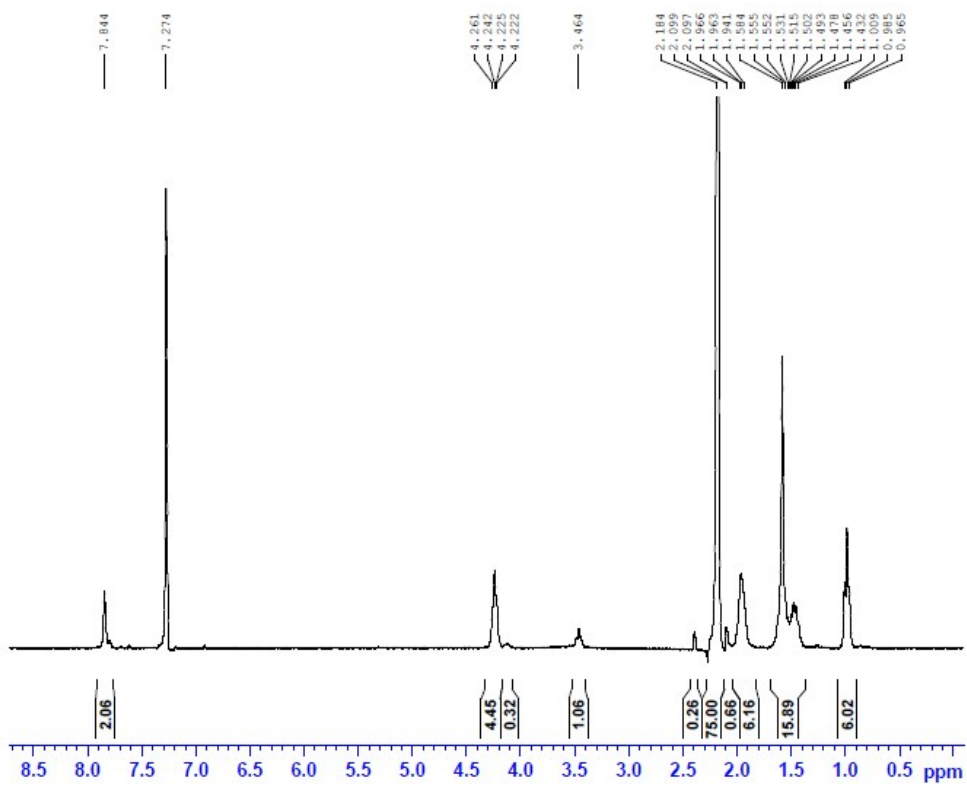

Fig.S8 <sup>1</sup>H NMR spectra of 2a

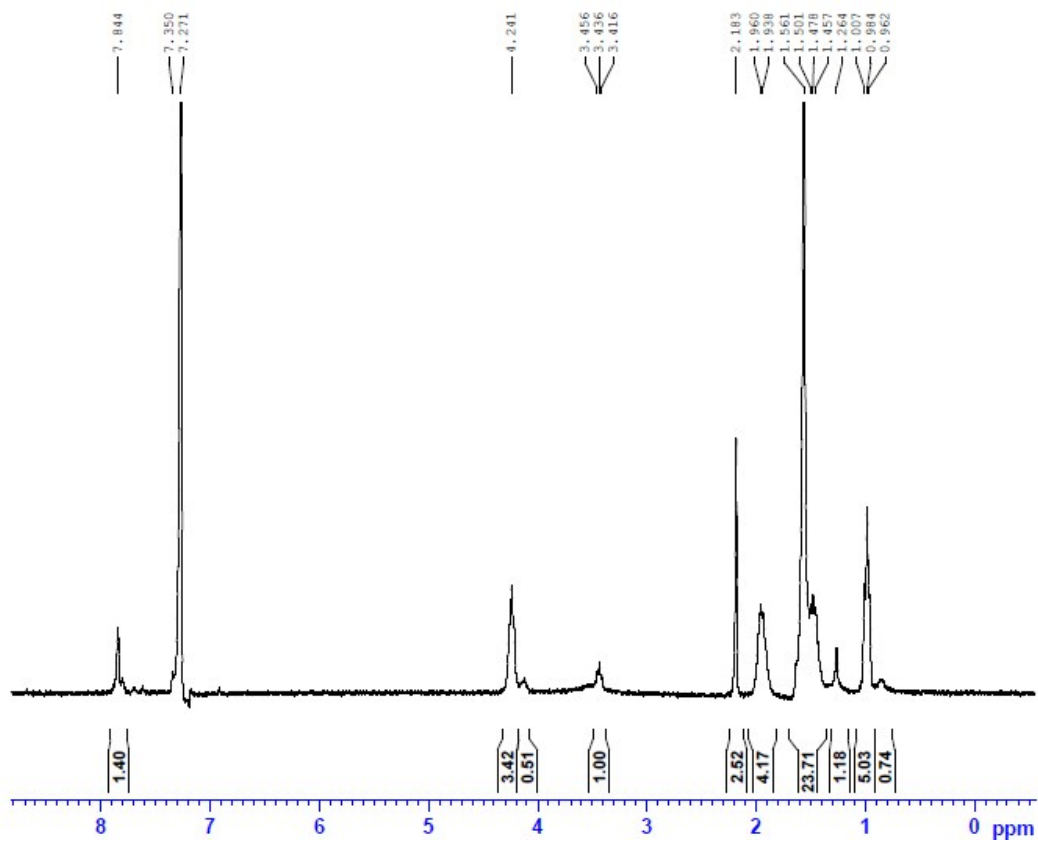

Fig.S9 <sup>1</sup>H NMR spectra of 2b

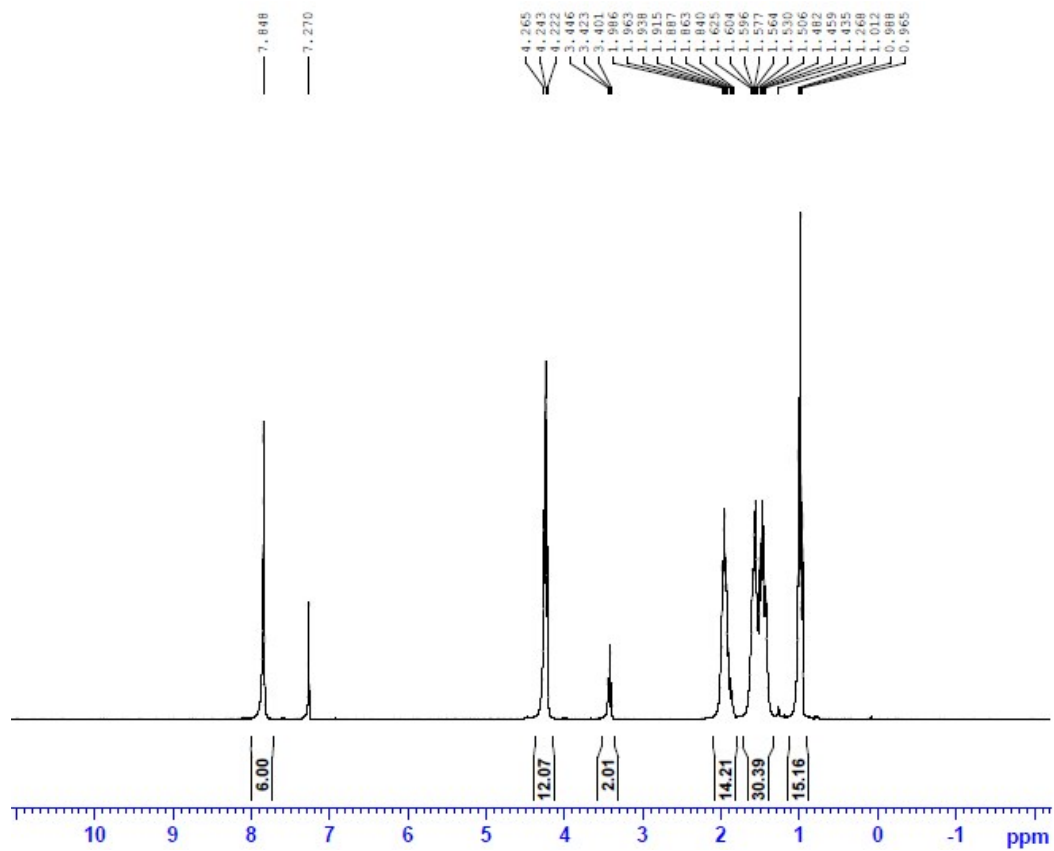

Fig.S10 <sup>1</sup>H NMR spectra of 2c



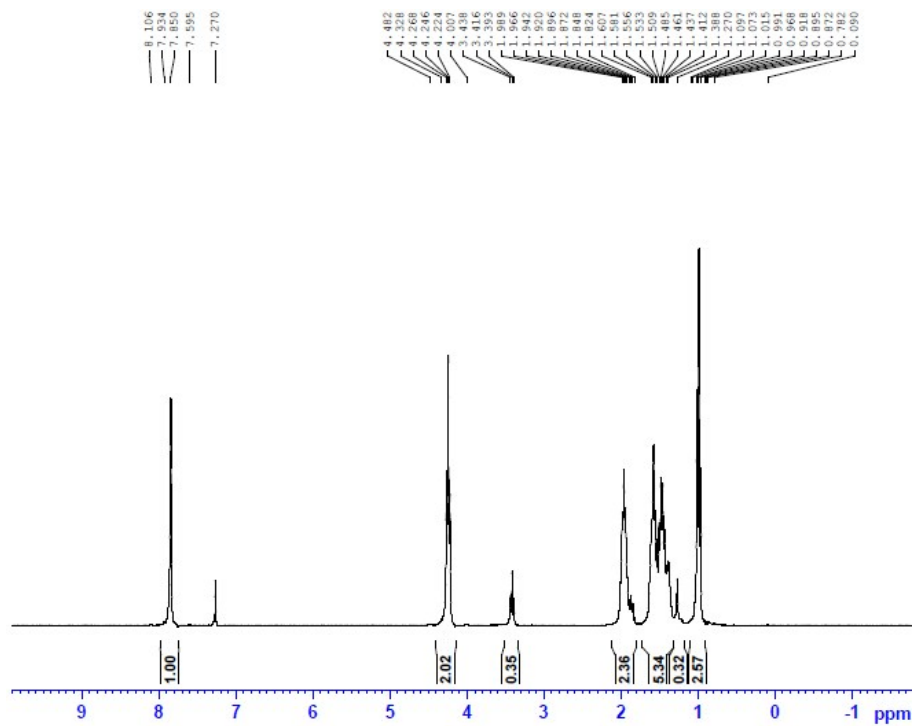

Fig.S11 <sup>1</sup>H NMR spectra of 2d

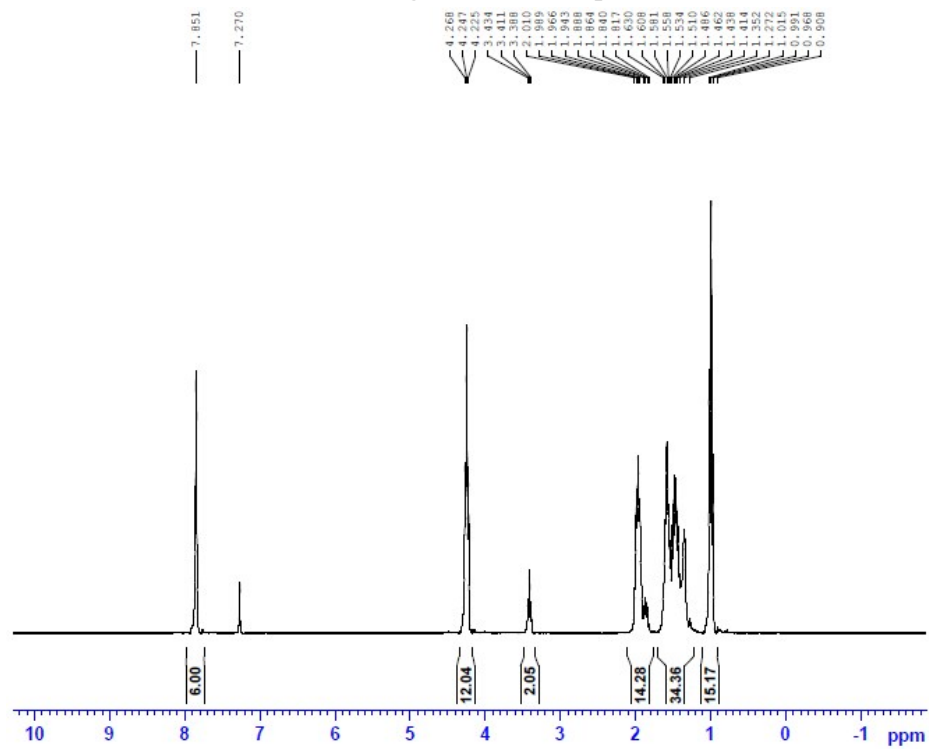

Fig.S12 <sup>1</sup>H NMR spectra of 2e

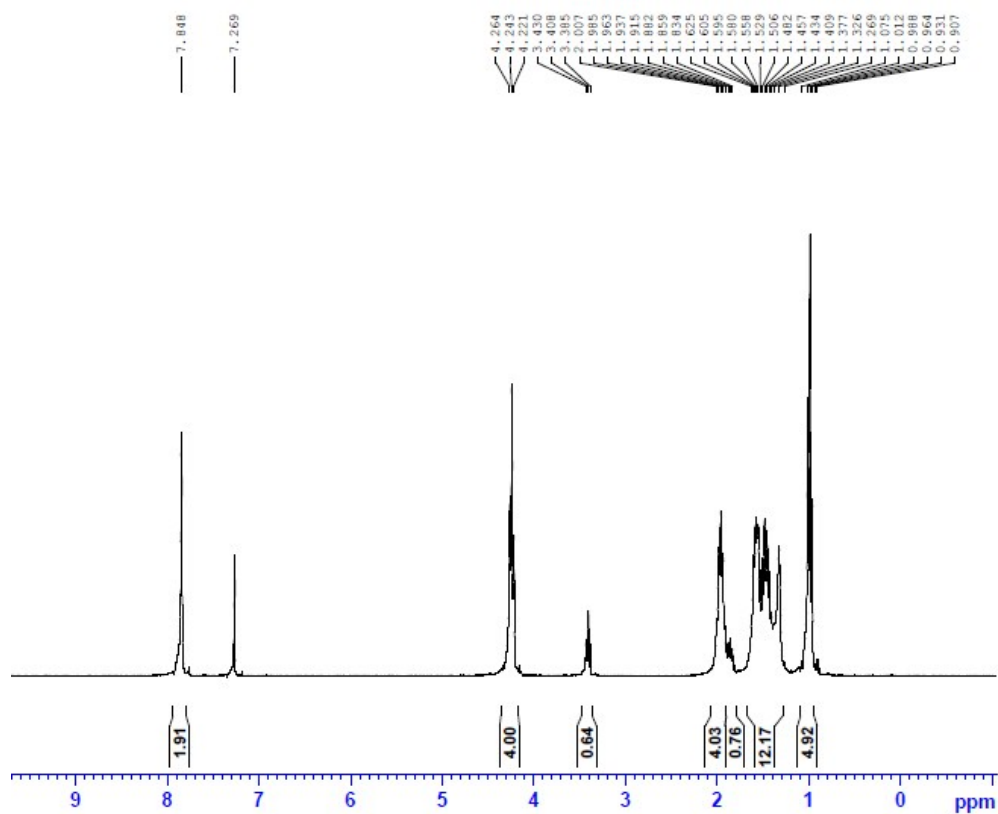

Fig.S13  $^1\text{H}$ NMR spectra of 2f

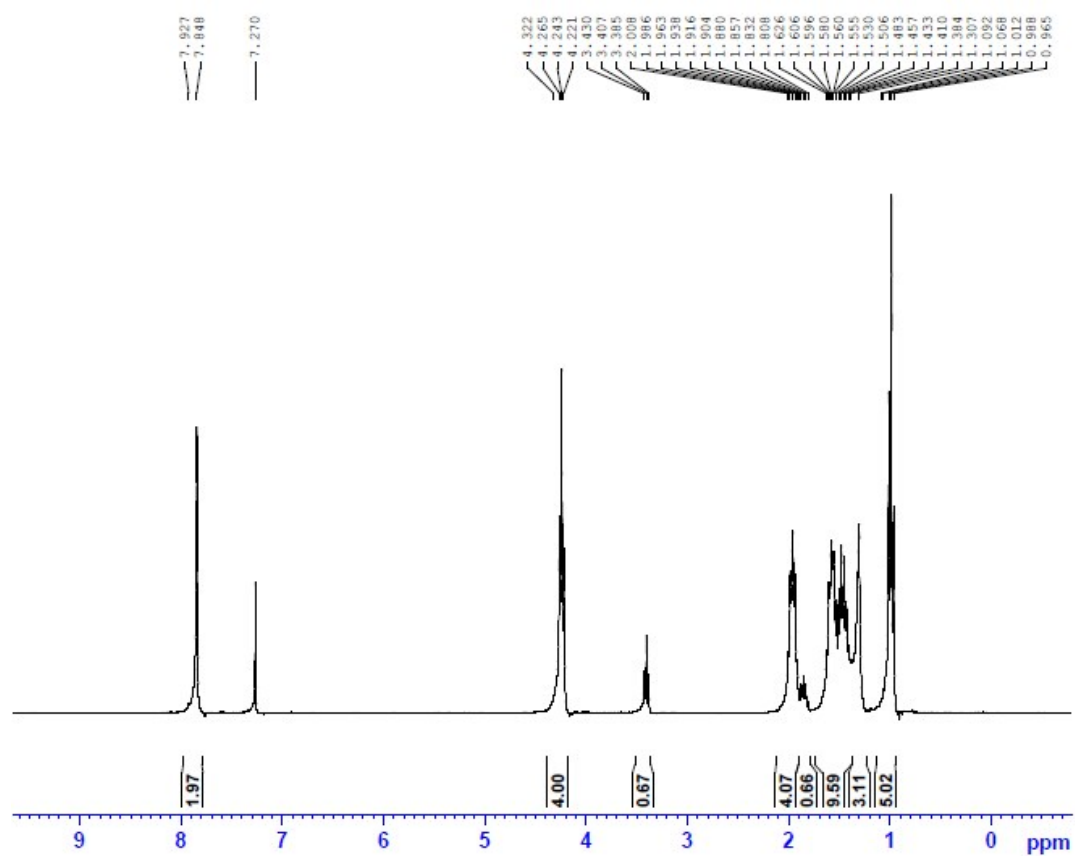

Fig.S14  $^1\text{H}$ NMR spectra of 2g

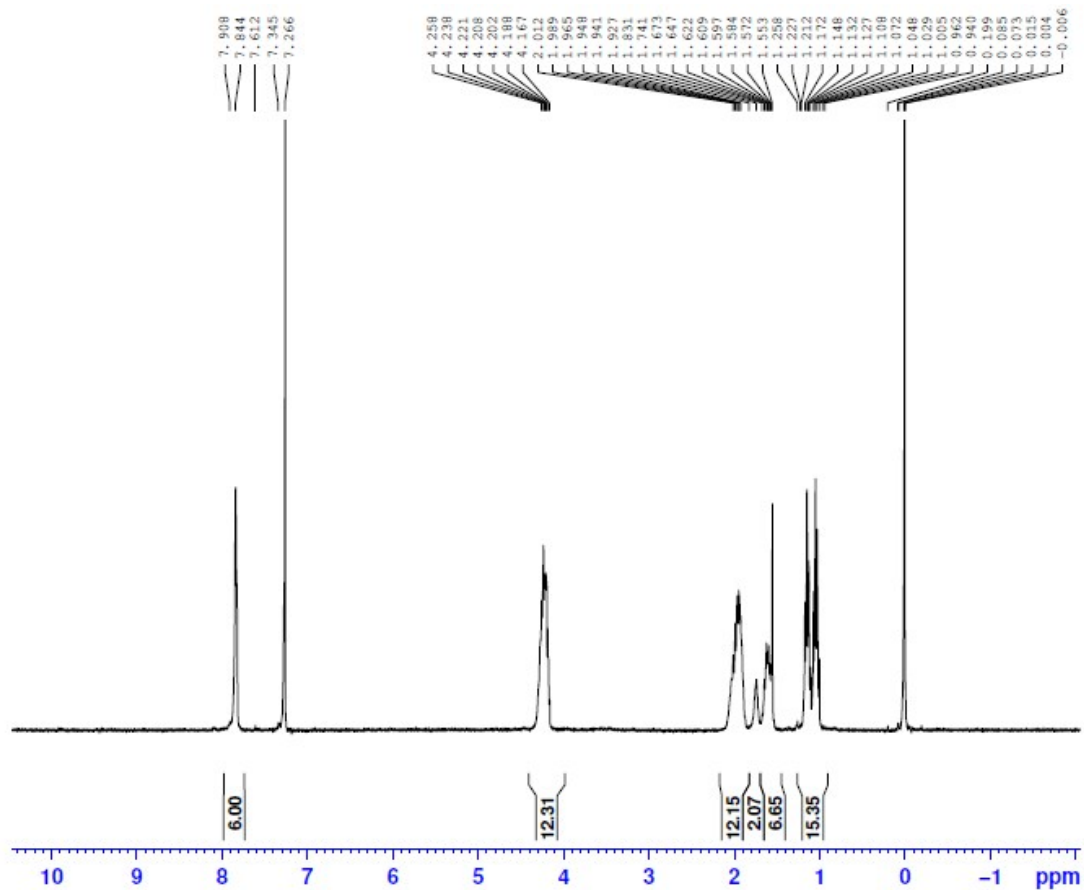

Fig.S15 <sup>1</sup>H NMR spectra of T<sub>3,4</sub>D<sub>6</sub>

| Sample No. | Formula (M)                                      | Ion Formula      | Measured m/z | Calc m/z  | Diff (ppm) |
|------------|--------------------------------------------------|------------------|--------------|-----------|------------|
| 346        | C <sub>77</sub> H <sub>104</sub> O <sub>12</sub> | [M] <sup>+</sup> | 1220.7518    | 1220.7522 | -0.3277    |

346 #288 RT: 0.71 AV: 1 NL: 1.60E7  
T: FTMS + p ESI Full ms [150.00-2000.00]

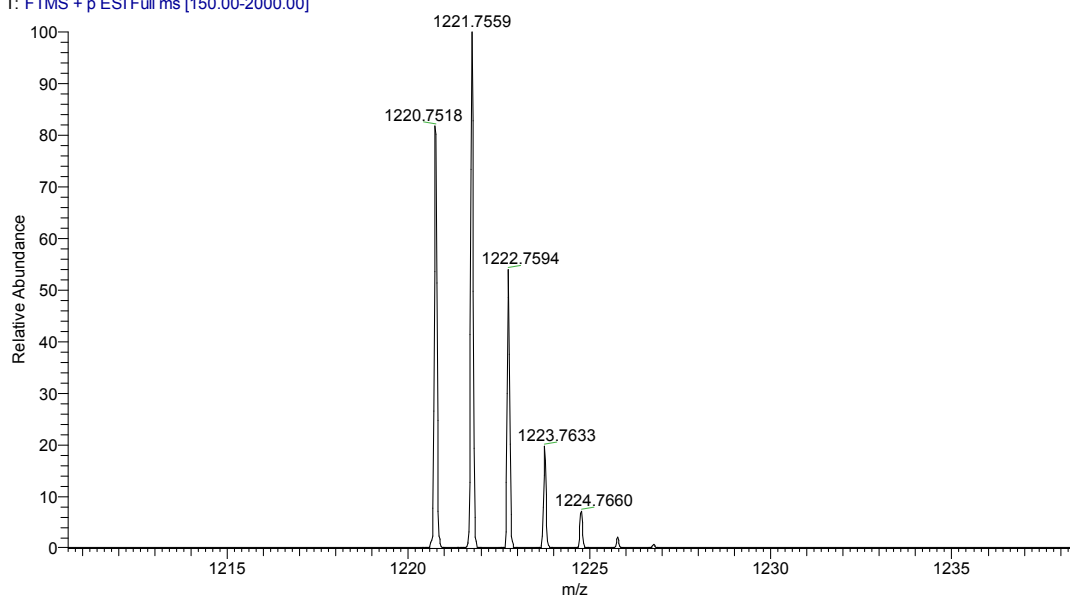

Fig.S16 HRMS spectra of T<sub>3,4</sub>D<sub>6</sub>

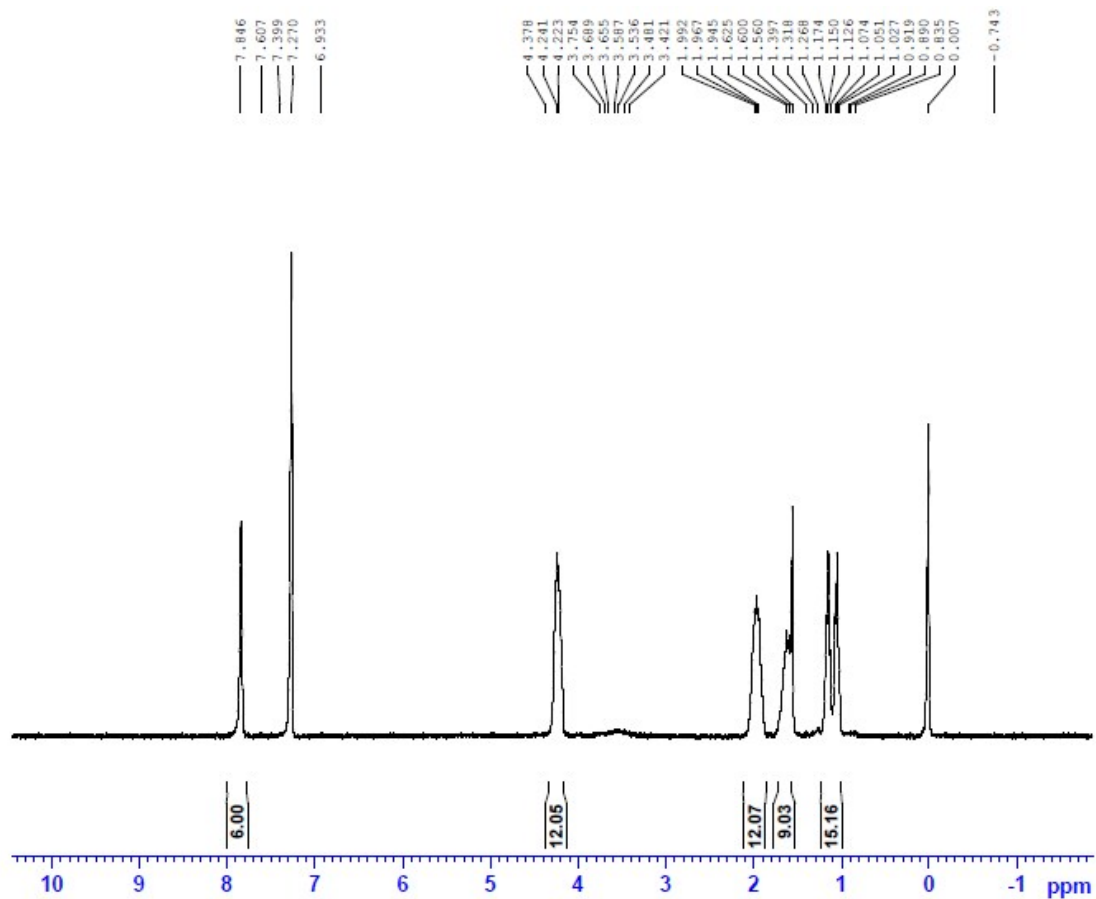

Fig.S17 <sup>1</sup>H NMR spectra of T<sub>3,4</sub>D<sub>7</sub>

| Sample No. | Formula (M)                                      | Ion Formula      | Measured m/z | Calc m/z  | Diff (ppm) |
|------------|--------------------------------------------------|------------------|--------------|-----------|------------|
| 347        | C <sub>78</sub> H <sub>106</sub> O <sub>12</sub> | [M] <sup>+</sup> | 1234.7679    | 1234.7679 | 0.0000     |

347 #128 RT: 1.23 AV: 1 NL: 1.63E5  
T: FTMS + p ESI Full ms [150.00-2000.00]

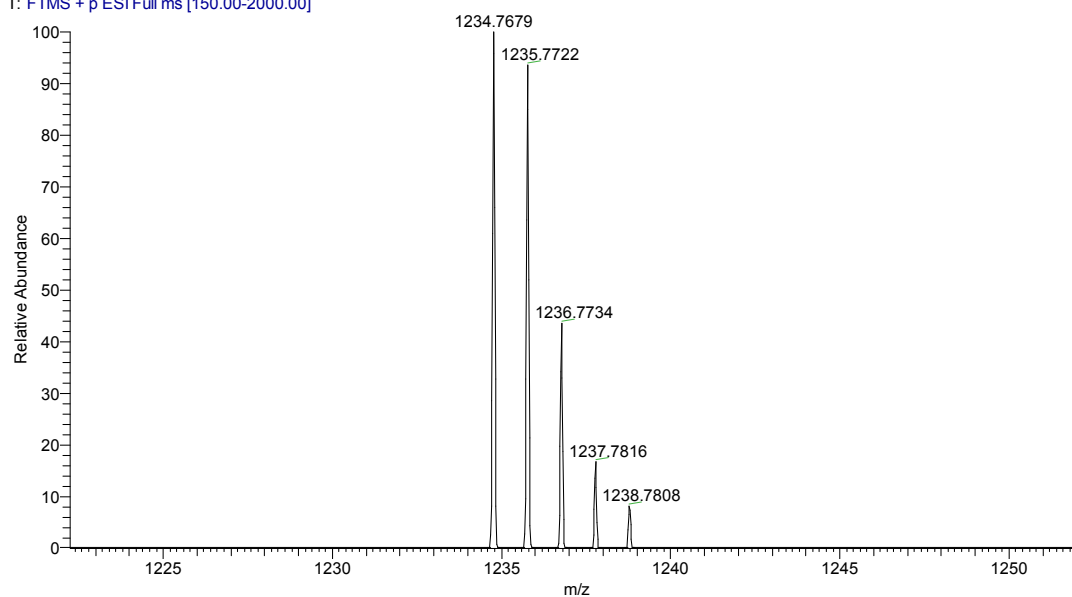

Fig.S18 HRMS spectra of T<sub>3,4</sub>D<sub>7</sub>

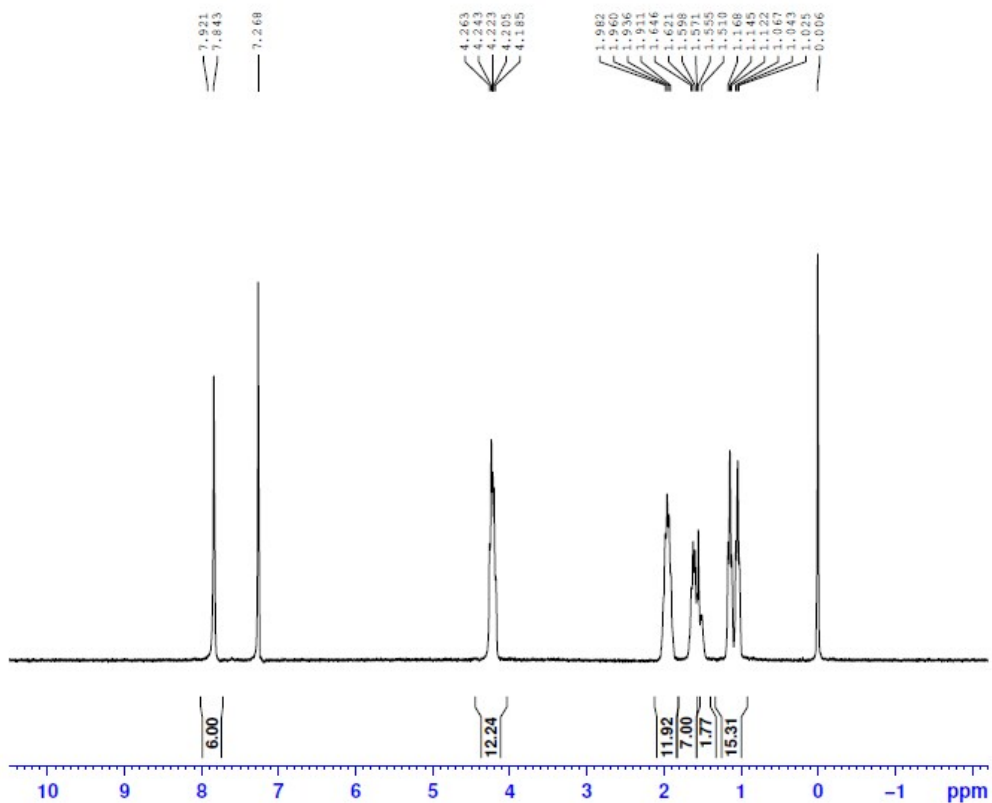

Fig.S19 <sup>1</sup>H NMR spectra of T<sub>3,4</sub>D<sub>8</sub>

| Sample No. | Formula (M)                                      | Ion Formula      | Measured m/z | Calc m/z  | Diff (ppm) |
|------------|--------------------------------------------------|------------------|--------------|-----------|------------|
| 348        | C <sub>79</sub> H <sub>108</sub> O <sub>12</sub> | [M] <sup>+</sup> | 1248.7835    | 1248.7834 | 0.0801     |

348 #165 RT: 1.16 AV: 1 NL: 1.22E7  
T: FTMS + p ESI Full ms [150.00-2000.00]

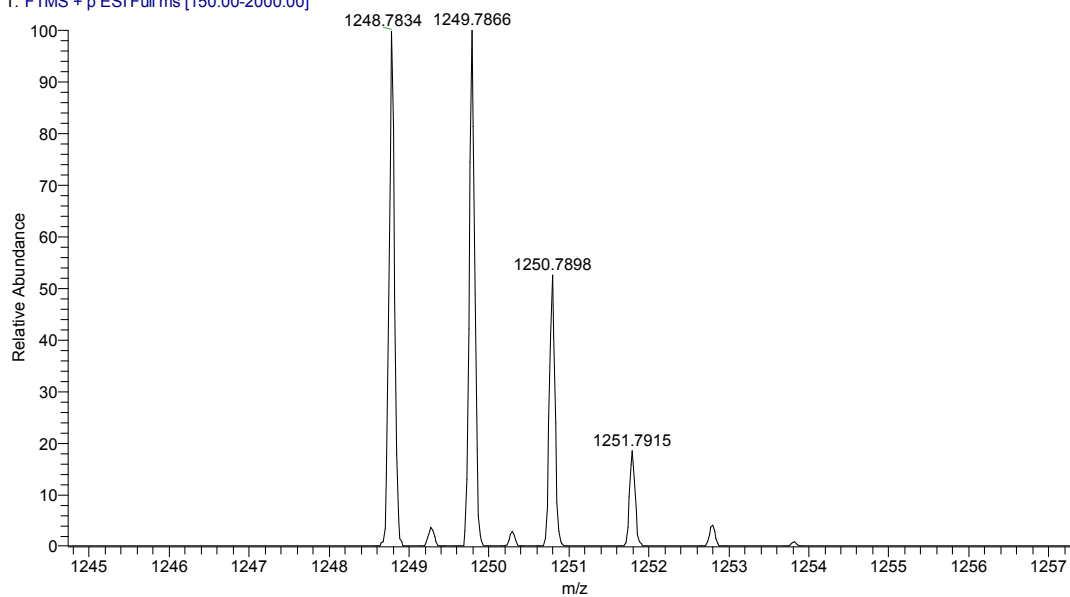

Fig.S20 HRMS spectra of T<sub>3,4</sub>D<sub>8</sub>

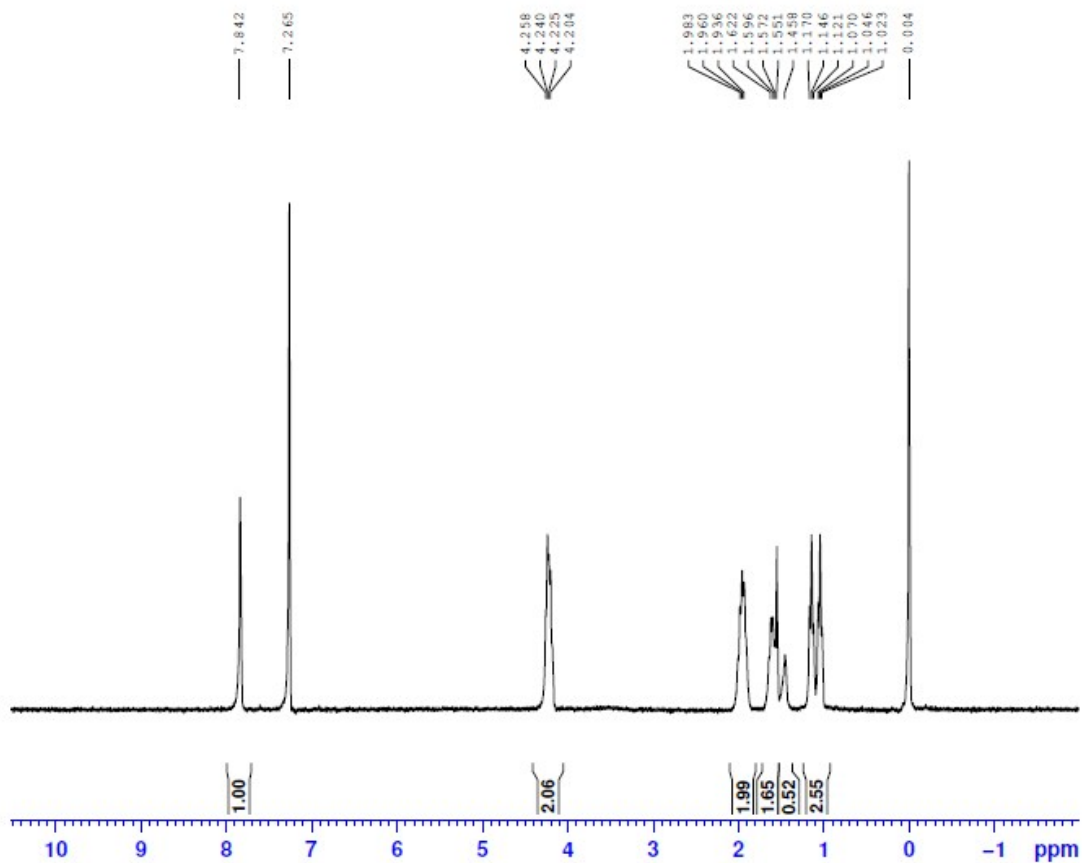

Fig.S21 <sup>1</sup>H NMR spectra of T<sub>3,4</sub>D<sub>9</sub>

| Sample No. | Formula (M)                                      | Ion Formula      | Measured m/z | Calc m/z  | Diff (ppm) |
|------------|--------------------------------------------------|------------------|--------------|-----------|------------|
| 349        | C <sub>80</sub> H <sub>110</sub> O <sub>12</sub> | [M] <sup>+</sup> | 1262.7992    | 1262.7990 | 0.1584     |

349 #101 RT: 0.71 AV: 1 NL: 9.80E7  
T: FTMS + p ESI Full ms [150.00-2000.00]

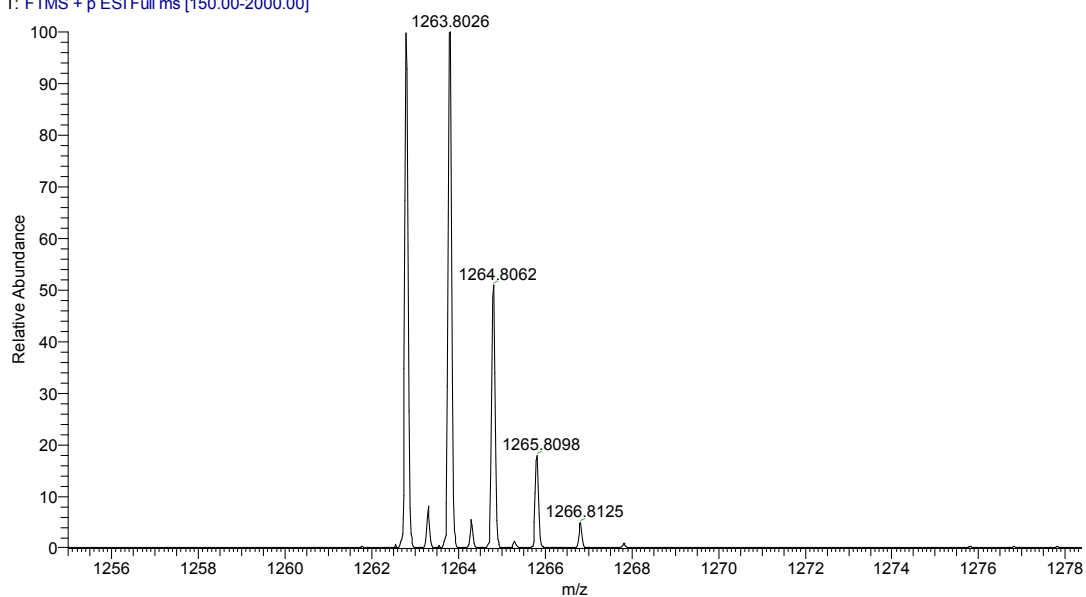

Fig.S22 HRMS spectra of T<sub>3,4</sub>D<sub>9</sub>

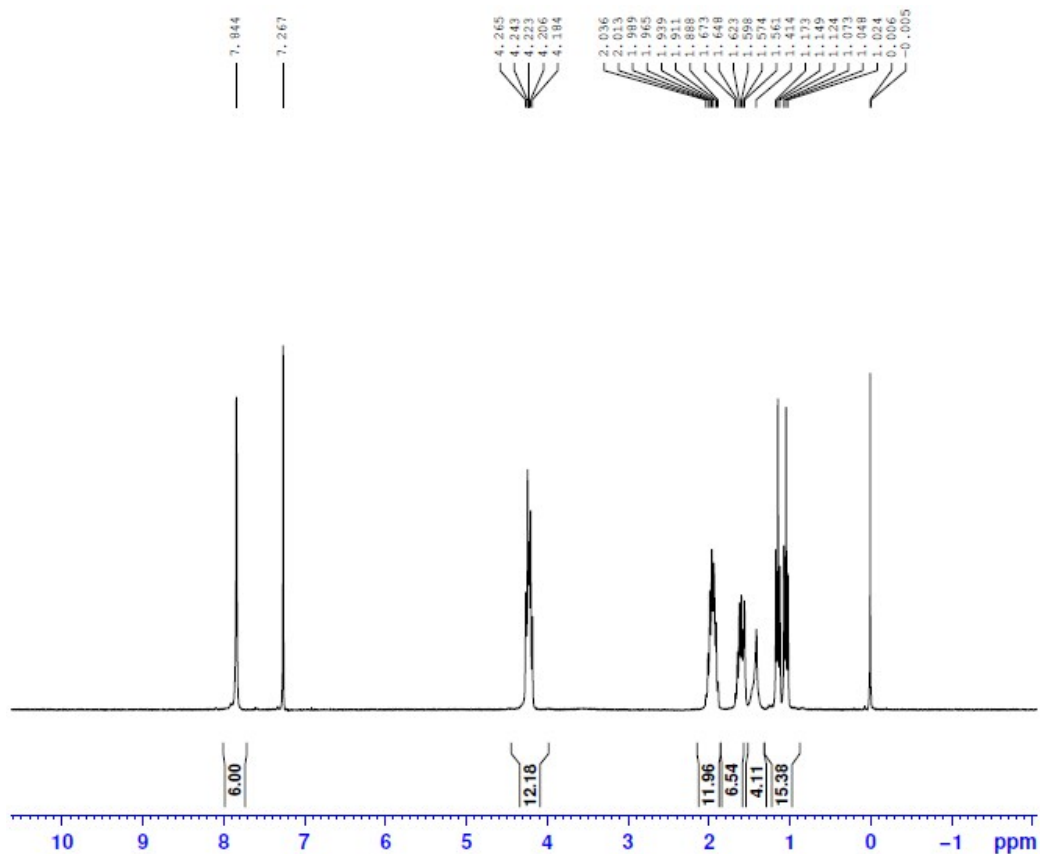

Fig.S23 <sup>1</sup>H NMR spectra of T<sub>3,4</sub>D<sub>10</sub>

| Sample No. | Formula (M)                                      | Ion Formula      | Measured m/z | Calc m/z  | Diff (ppm) |
|------------|--------------------------------------------------|------------------|--------------|-----------|------------|
| 3410       | C <sub>81</sub> H <sub>112</sub> O <sub>12</sub> | [M] <sup>+</sup> | 1276.8148    | 1276.8145 | 0.2350     |

3410 #122 RT: 0.86 AV: 1 NL: 9.58E5  
T: FTMS + p ESI Full ms [150.00-2000.00]

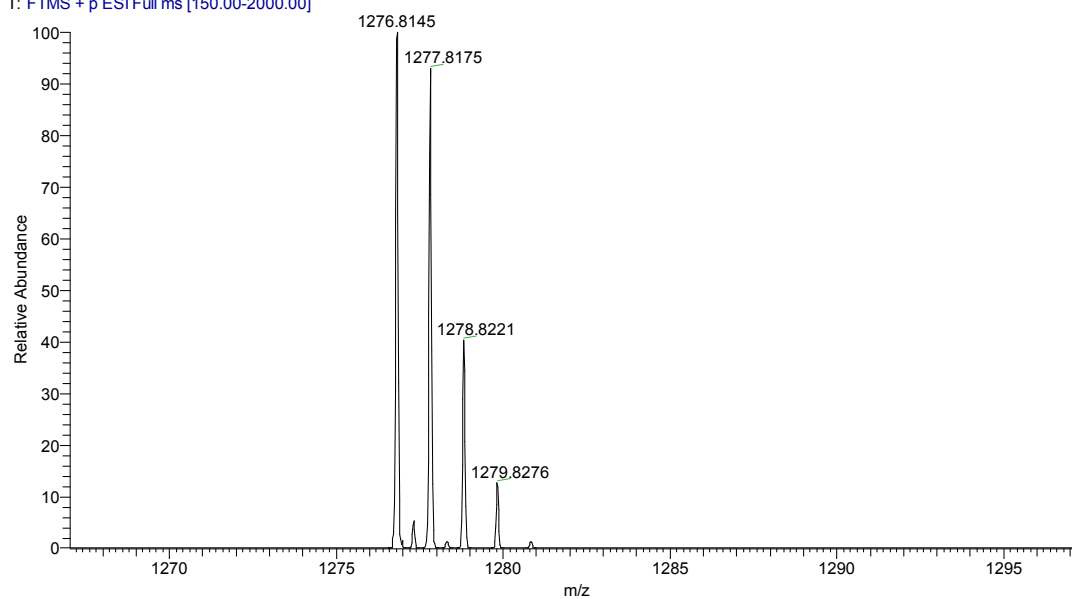

Fig.S24 HRMS spectra of T<sub>3,4</sub>D<sub>10</sub>

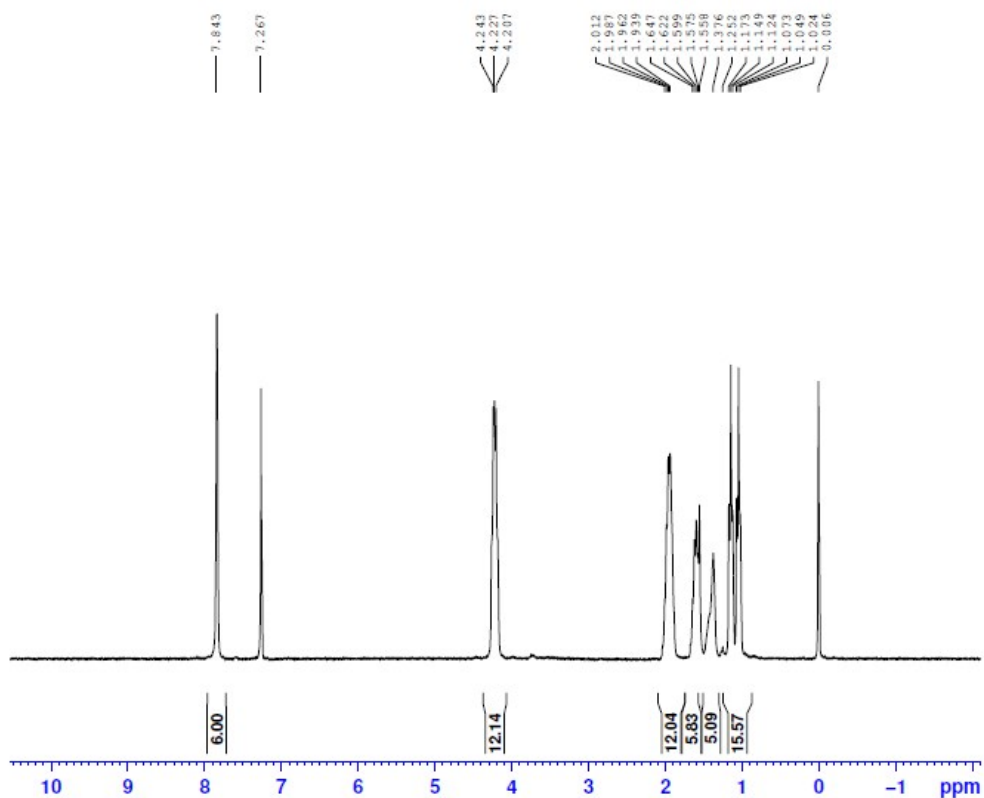

Fig.S25 <sup>1</sup>H NMR spectra of T<sub>3,4</sub>D<sub>11</sub>

| Sample No. | Formula (M)                                      | Ion Formula      | Measured m/z | Calc m/z  | Diff (ppm) |
|------------|--------------------------------------------------|------------------|--------------|-----------|------------|
| 3411       | C <sub>82</sub> H <sub>114</sub> O <sub>12</sub> | [M] <sup>+</sup> | 1290.8305    | 1290.8304 | 0.0775     |

3411 #71 RT: 0.50 AV: 1 NL: 7.32E7  
T: FTMS + p ESI Full ms [150.00-2000.00]

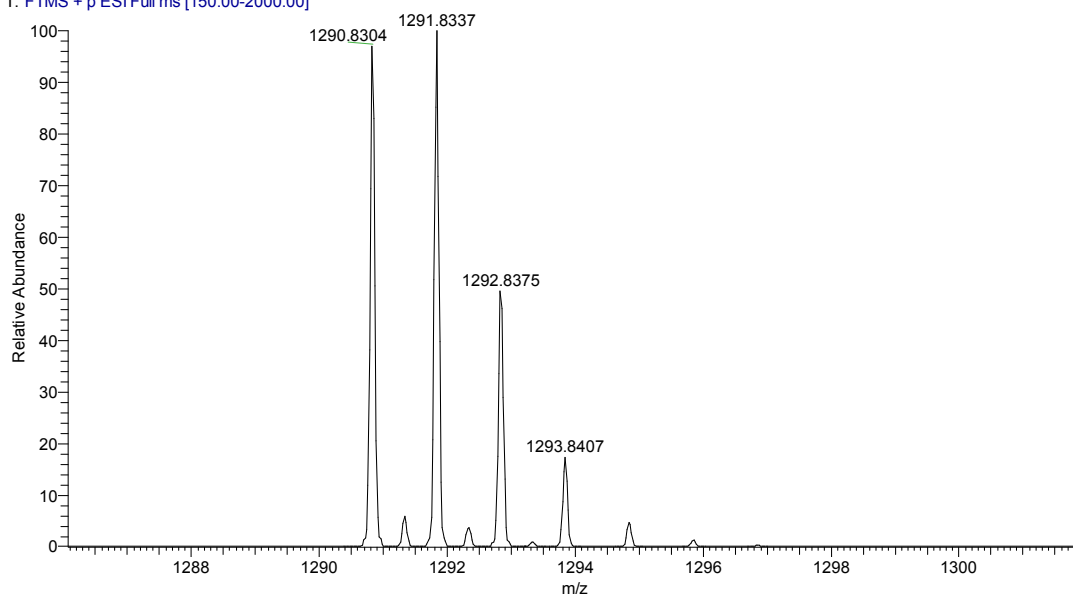

Fig.S26 HRMS spectra of T<sub>3,4</sub>D<sub>11</sub>



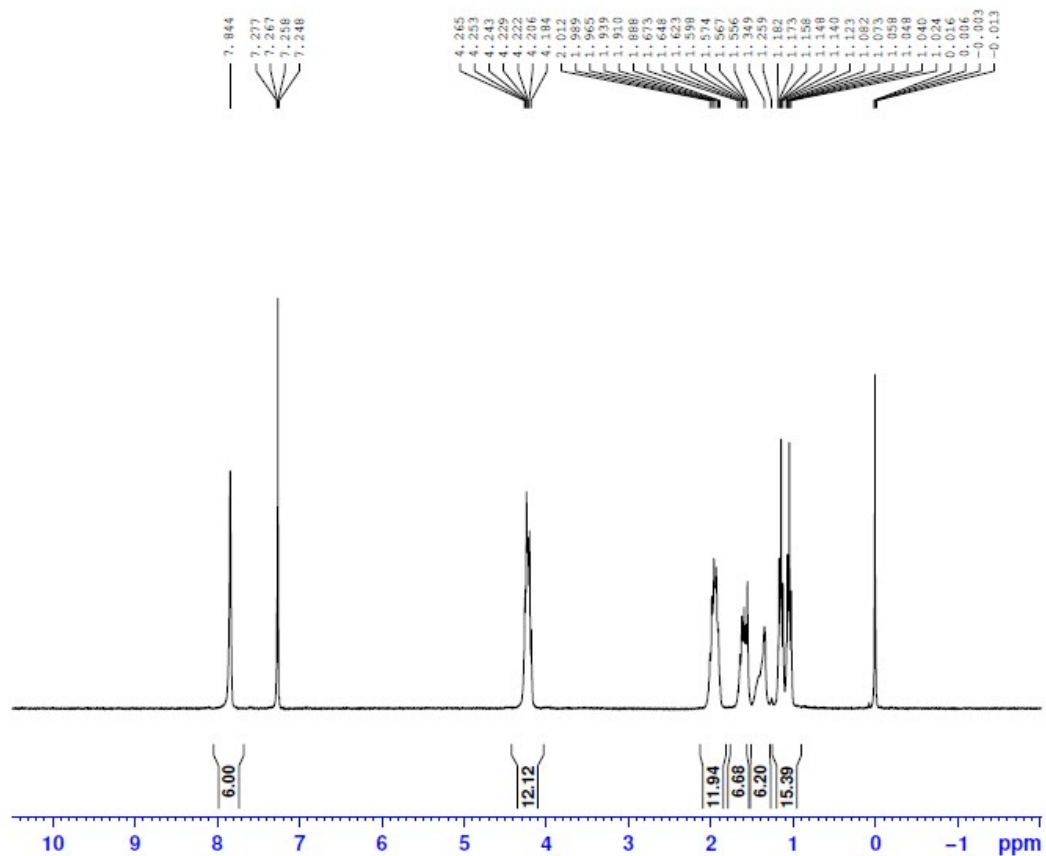

Fig.S27 <sup>1</sup>H NMR spectra of T<sub>3,4</sub>D<sub>12</sub>

| Sample No. | Formula (M)                                      | Ion Formula      | Measured m/z | Calc m/z  | Diff (ppm) |
|------------|--------------------------------------------------|------------------|--------------|-----------|------------|
| 3412       | C <sub>83</sub> H <sub>116</sub> O <sub>12</sub> | [M] <sup>+</sup> | 1304.8461    | 1304.8461 | 0.0000     |

3412 #89 RT: 0.63 AV: 1 NL: 3.37E6  
T: FTMS + p ESI Full ms [150.00-2000.00]

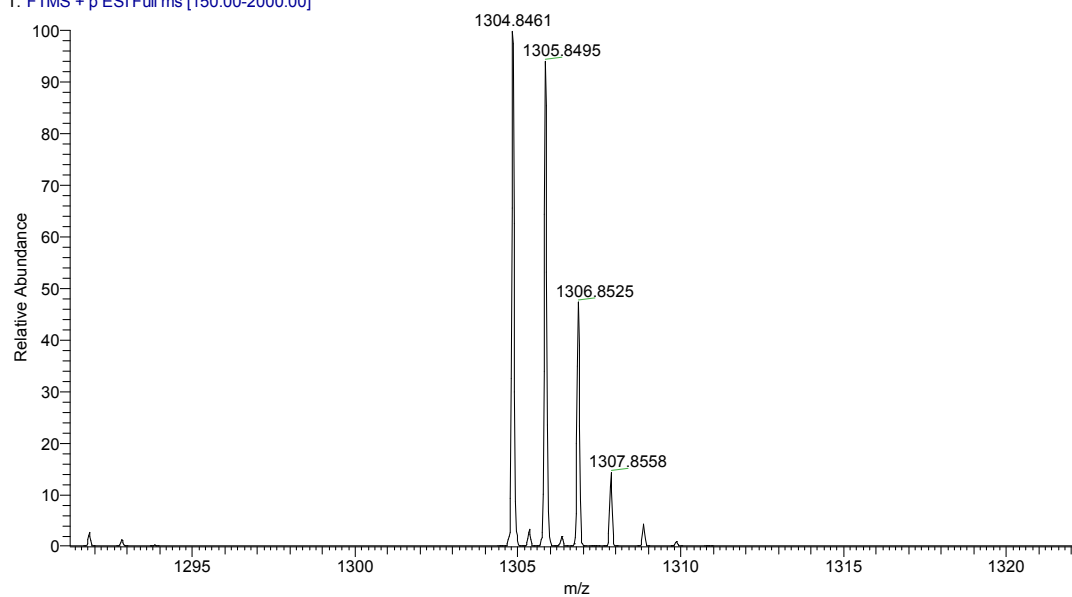

Fig.S28 HRMS spectra of T<sub>3,4</sub>D<sub>12</sub>

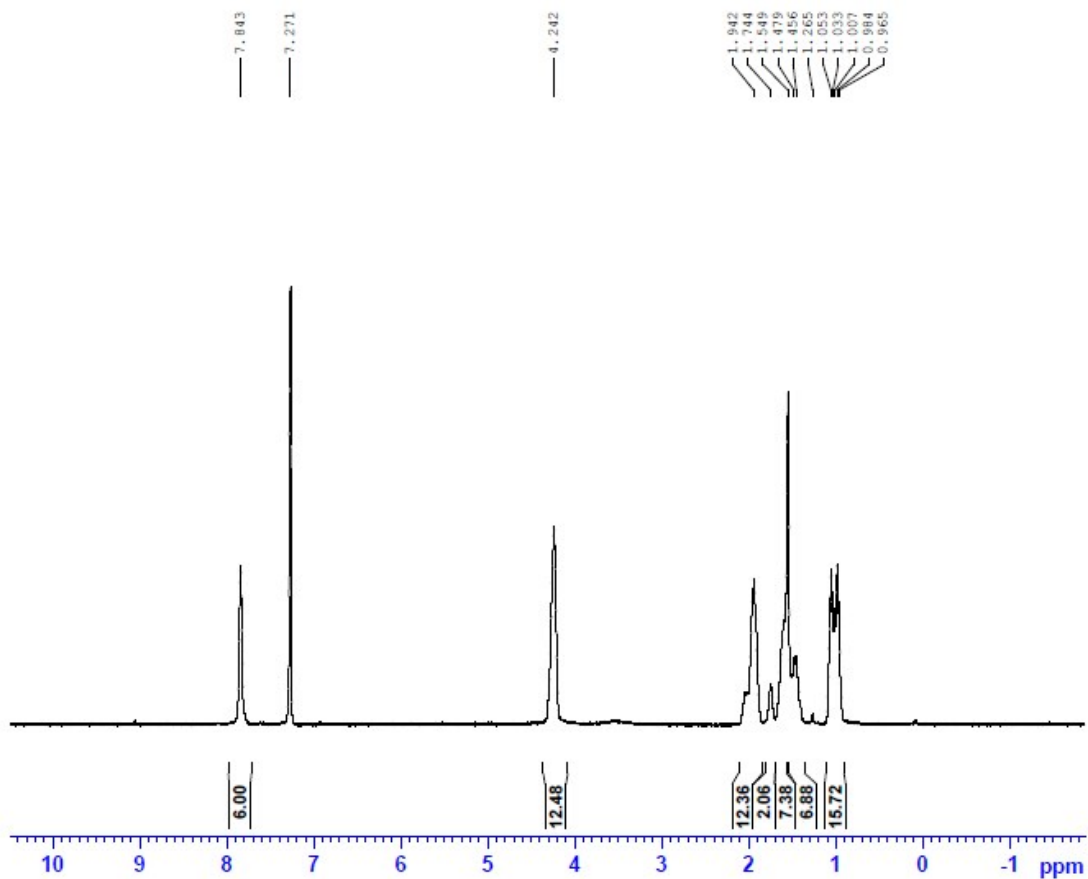

Fig.S29 <sup>1</sup>H NMR spectra of T<sub>4,5</sub>D<sub>6</sub>

| Sample No. | Formula (M)                                      | Ion Formula      | Measured m/z | Calc m/z  | Diff (ppm) |
|------------|--------------------------------------------------|------------------|--------------|-----------|------------|
| 456        | C <sub>87</sub> H <sub>124</sub> O <sub>12</sub> | [M] <sup>+</sup> | 1360.9087    | 1360.9088 | -0.0735    |

456 #76 RT: 0.53 AV: 1 NL: 1.23E7  
T: FTMS + p ESI Full ms [150.00-2000.00]

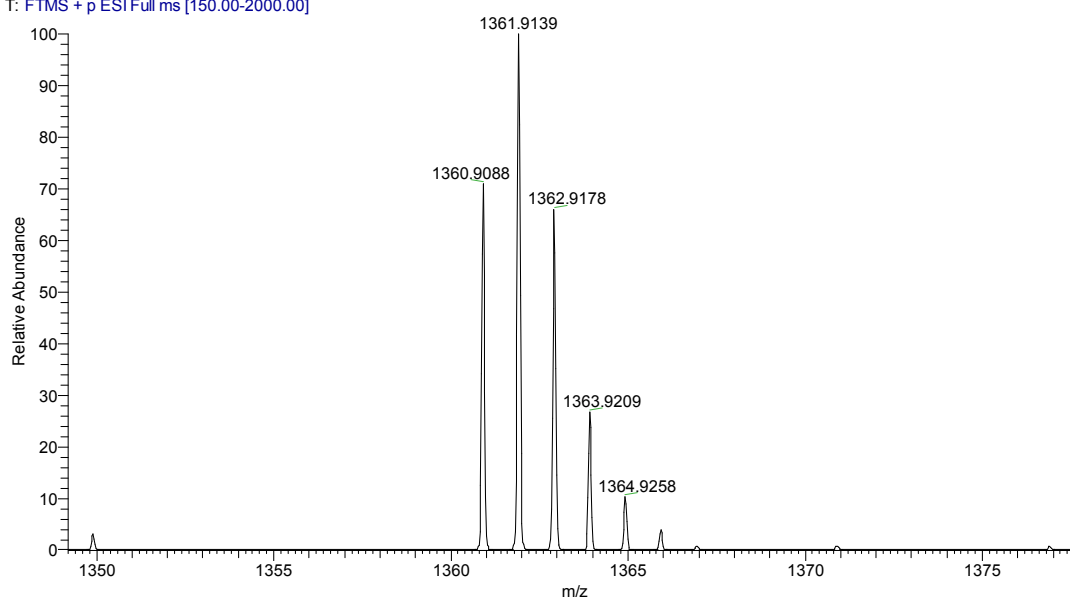

Fig.S30 HRMS spectra of T<sub>4,5</sub>D<sub>6</sub>

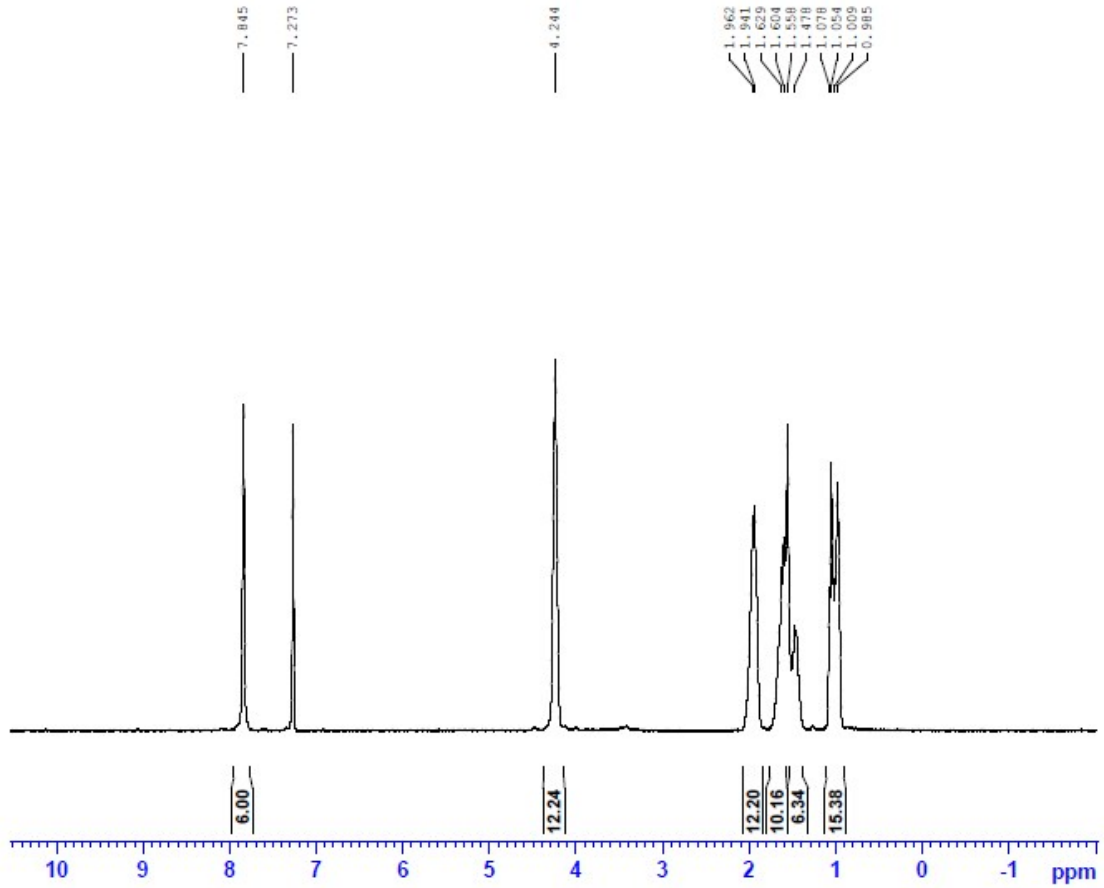

Fig.S31 <sup>1</sup>H NMR spectra of T<sub>4,5</sub>D<sub>7</sub>

| Sample No. | Formula (M)                                      | Ion Formula      | Measured m/z | Calc m/z  | Diff (ppm) |
|------------|--------------------------------------------------|------------------|--------------|-----------|------------|
| 457        | C <sub>88</sub> H <sub>126</sub> O <sub>12</sub> | [M] <sup>+</sup> | 1374.9244    | 1374.9247 | -0.2182    |

457 #85 RT: 0.59 AV: 1 NL: 3.45E7  
 T: FTMS + p ESI Full ms [150.00-2000.00]

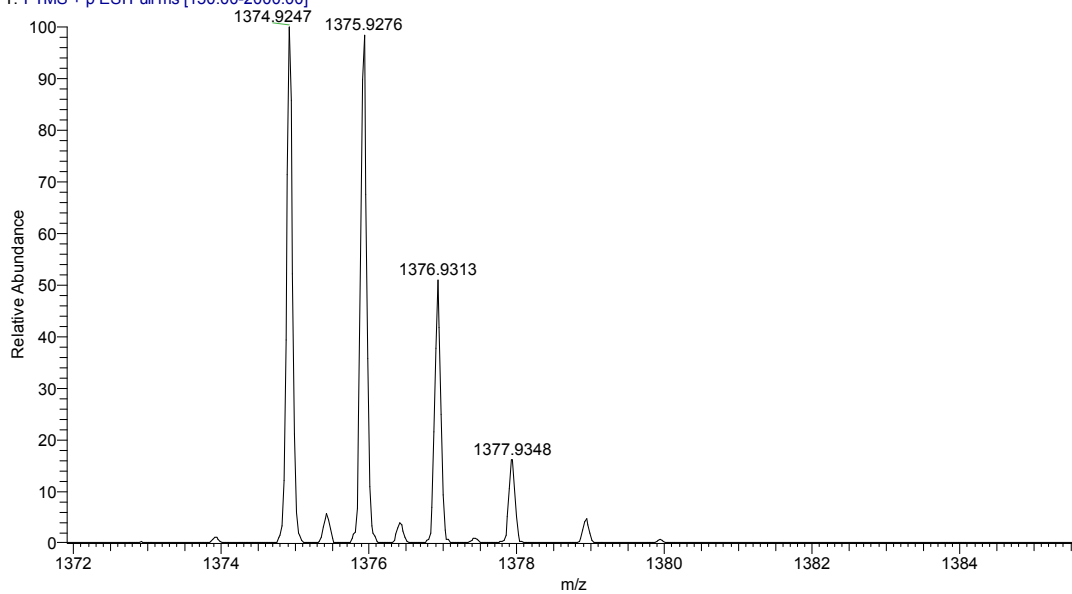

Fig.S32 HRMS spectra of T<sub>4,5</sub>D<sub>7</sub>

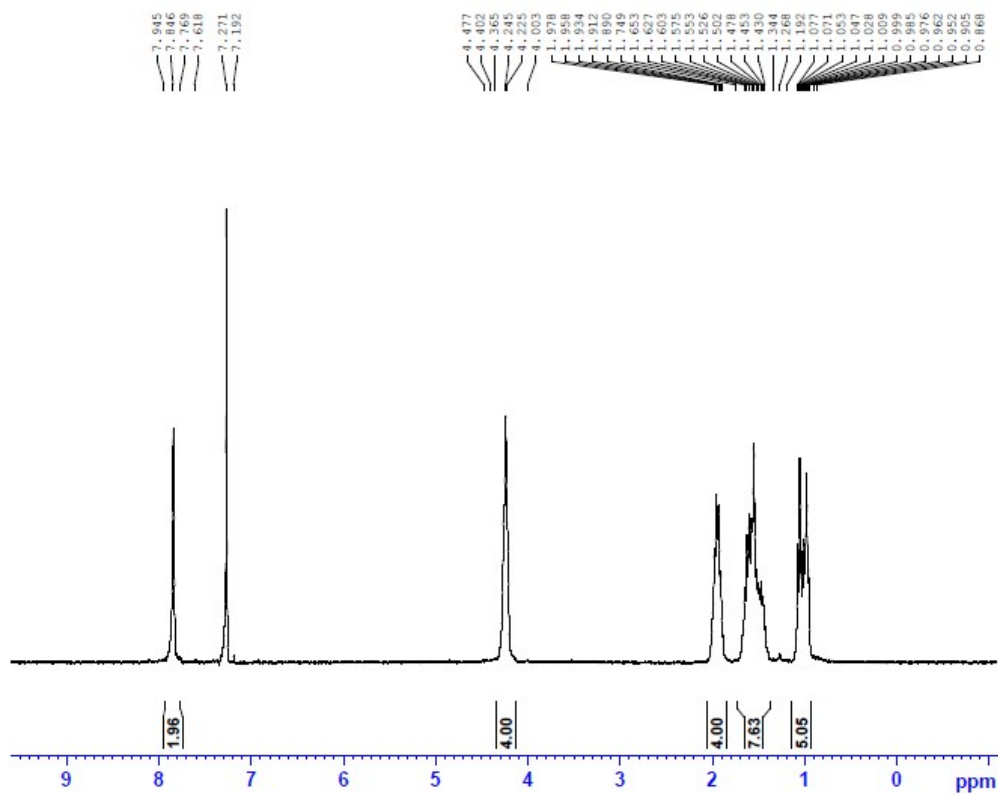

Fig.S33 <sup>1</sup>H NMR spectra of T<sub>4,5</sub>D<sub>8</sub>

| Sample No. | Formula (M)                                      | Ion Formula      | Measured m/z | Calc m/z  | Diff (ppm) |
|------------|--------------------------------------------------|------------------|--------------|-----------|------------|
| 458        | C <sub>89</sub> H <sub>128</sub> O <sub>12</sub> | [M] <sup>+</sup> | 1388.9400    | 1388.9403 | -0.2160    |

458 #62 RT: 0.43 AV: 1 NL: 1.43E7  
T: FTMS + p ESI Full ms [150.00-2000.00]

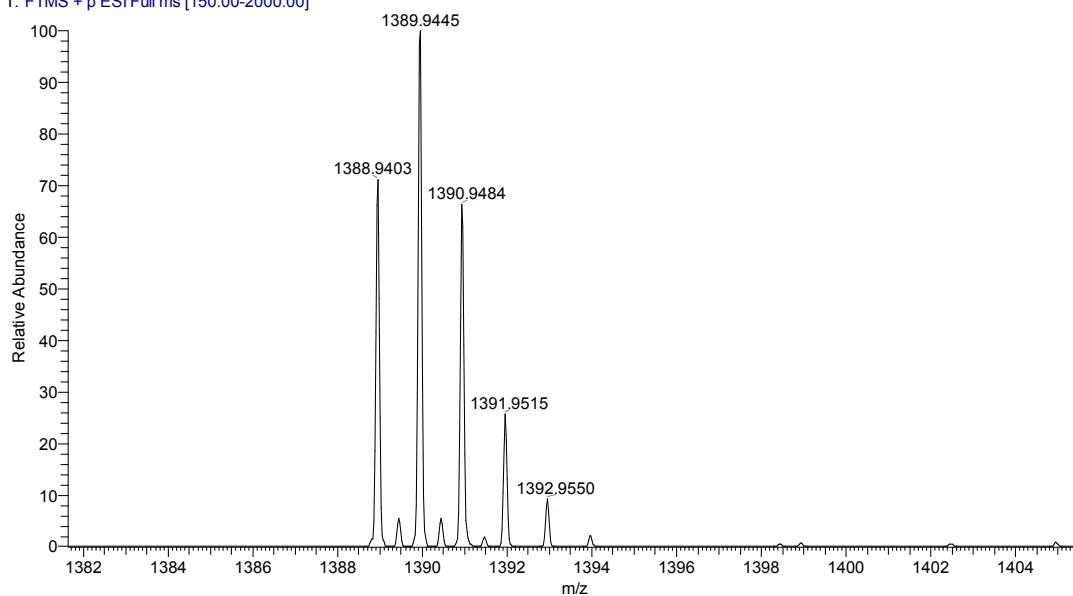

Fig.S34 HRMS spectra of T<sub>4,5</sub>D<sub>8</sub>

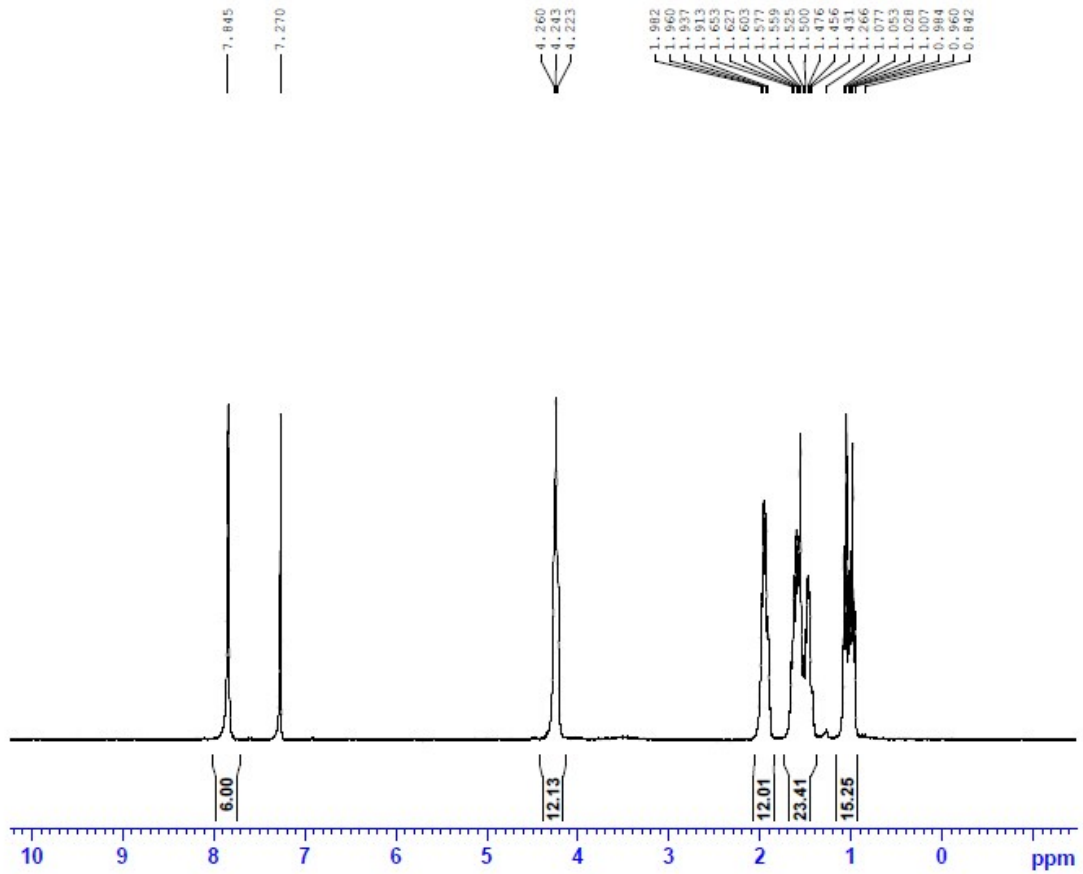

Fig.S35 <sup>1</sup>H NMR spectra of T<sub>4,5</sub>D<sub>9</sub>

| Sample No. | Formula (M)                                      | Ion Formula      | Measured m/z | Calc m/z  | Diff (ppm) |
|------------|--------------------------------------------------|------------------|--------------|-----------|------------|
| 459        | C <sub>90</sub> H <sub>130</sub> O <sub>12</sub> | [M] <sup>+</sup> | 1402.9557    | 1402.9562 | -0.3564    |

459 #143 RT: 1.00 AV: 1 NL: 3.29E7  
T: FTMS + p ESI Full ms [150.00-2000.00]

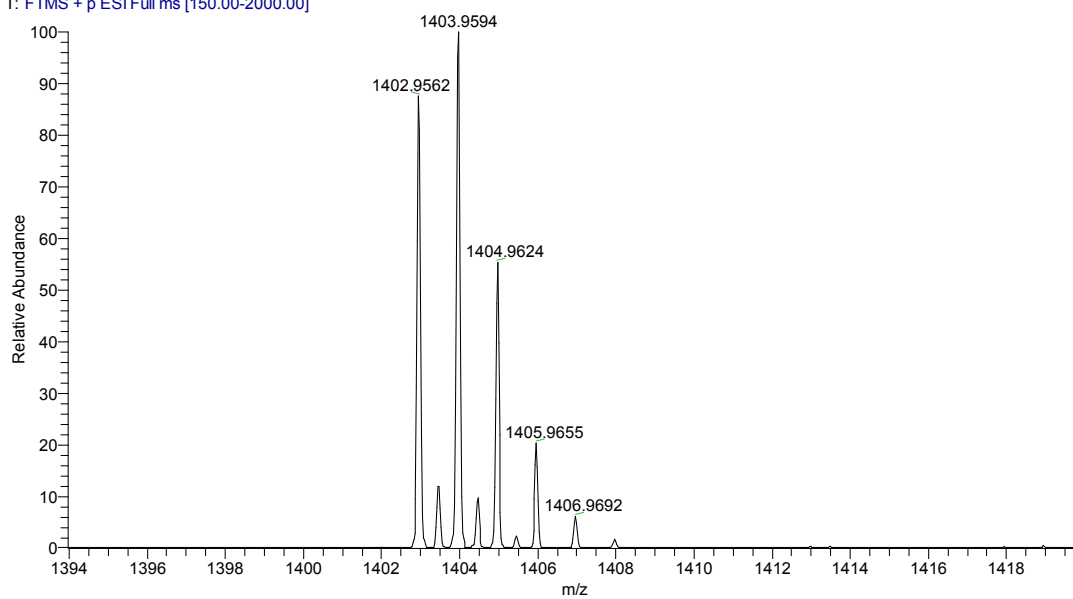

Fig.S36 HRMS spectra of T<sub>4,5</sub>D<sub>9</sub>

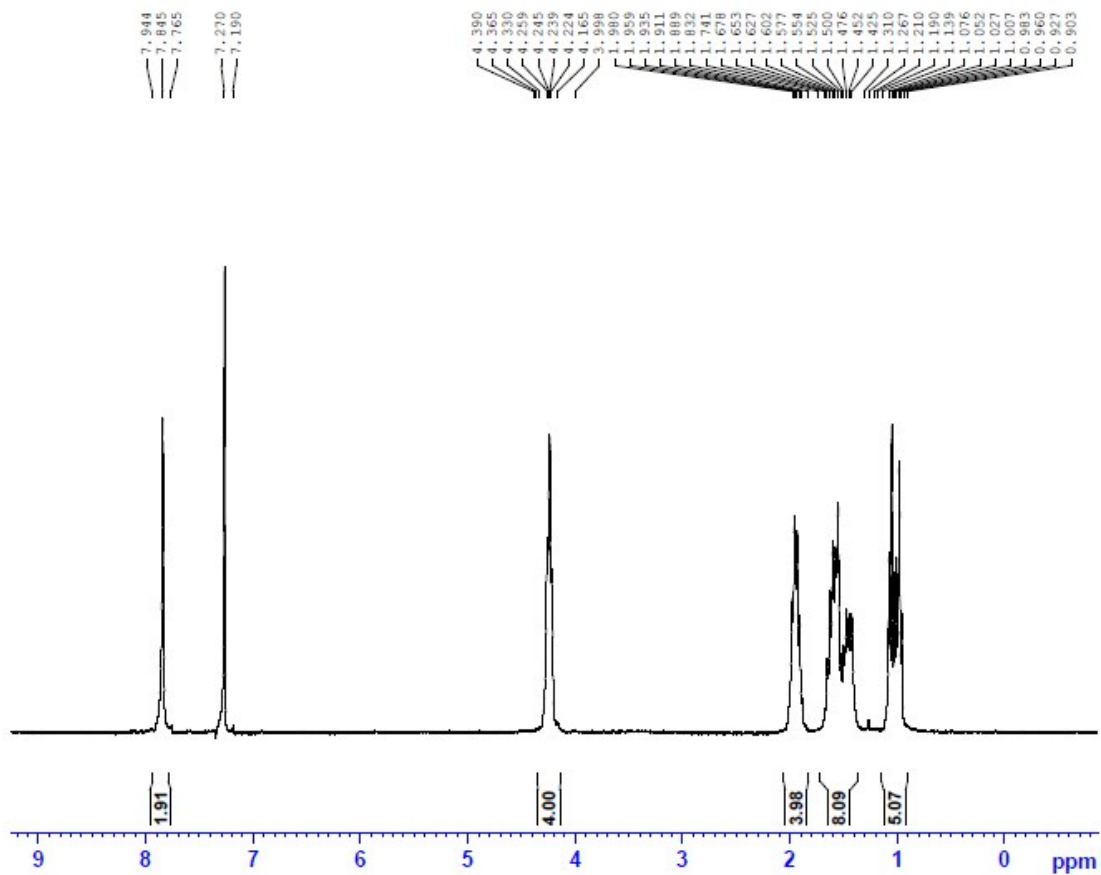

Fig.S37 <sup>1</sup>H NMR spectra of T<sub>4,5</sub>D<sub>10</sub>

| Sample No. | Formula (M)                                      | Ion Formula      | Measured m/z | Calc m/z  | Diff (ppm) |
|------------|--------------------------------------------------|------------------|--------------|-----------|------------|
| 4510       | C <sub>91</sub> H <sub>132</sub> O <sub>12</sub> | [M] <sup>+</sup> | 1416.9713    | 1416.9713 | 0.0000     |

4510 #42 RT: 0.29 AV: 1 NL: 1.17E7  
T: FTMS + p ESI Full ms [150.00-2000.00]

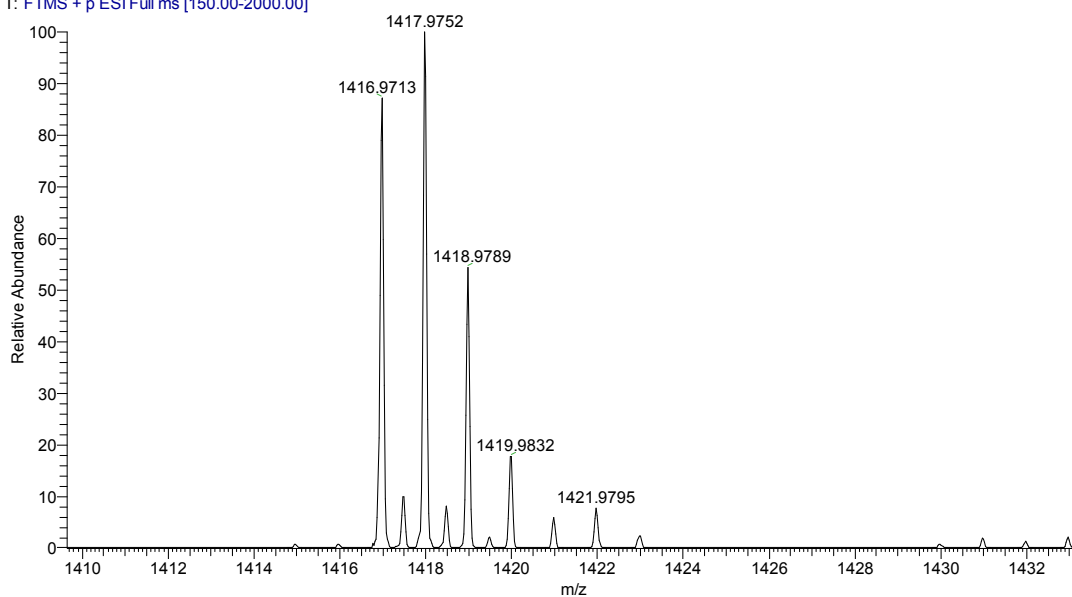

Fig.S38 HRMS spectra of T<sub>4,5</sub>D<sub>10</sub>

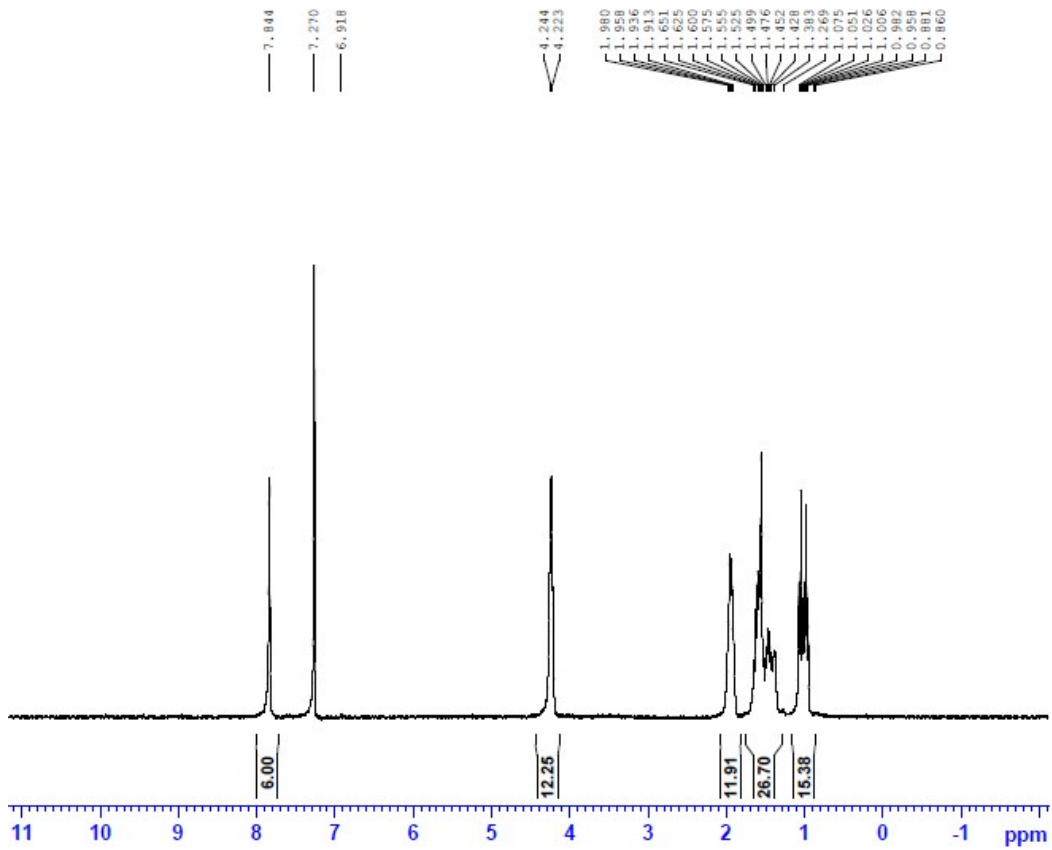

Fig. S39 <sup>1</sup>H NMR spectra of T<sub>4,5</sub>D<sub>11</sub>

| Sample No. | Formula (M)                                      | Ion Formula      | Measured m/z | Calc m/z  | Diff (ppm) |
|------------|--------------------------------------------------|------------------|--------------|-----------|------------|
| 4511       | C <sub>92</sub> H <sub>134</sub> O <sub>12</sub> | [M] <sup>+</sup> | 1430.9870    | 1430.9877 | -0.4892    |

4511 #53 RT: 0.37 AV: 1 NL: 3.20E6  
T: FTMS + p ESI Full ms [150.00-2000.00]

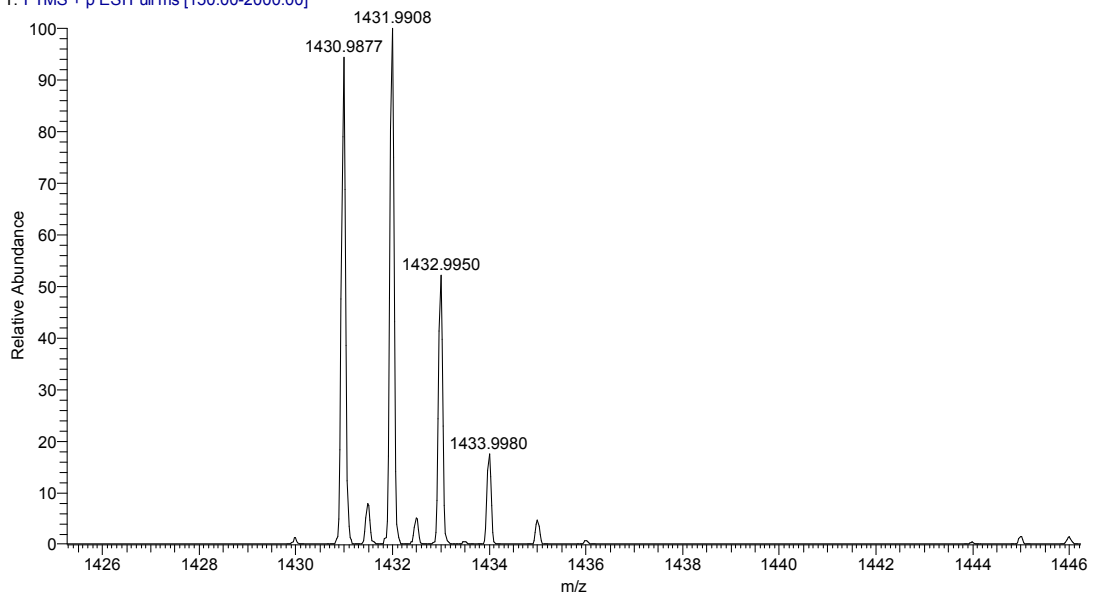

Fig.S40 HRMS spectra of T<sub>4,5</sub>D<sub>11</sub>

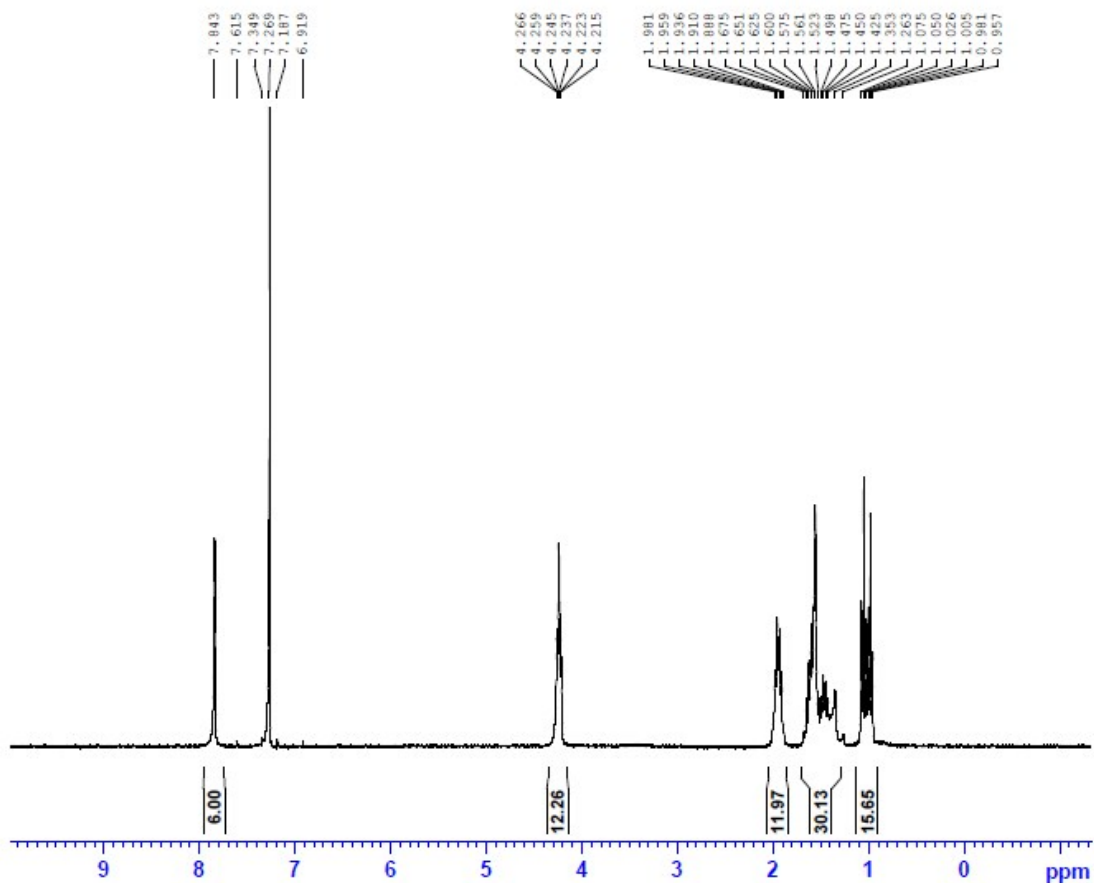

Fig.S41 <sup>1</sup>H NMR spectra of T<sub>4,5</sub>D<sub>12</sub>

| Sample No. | Formula (M)                                      | Ion Formula      | Measured m/z | Calc m/z  | Diff (ppm) |
|------------|--------------------------------------------------|------------------|--------------|-----------|------------|
| 4512       | C <sub>93</sub> H <sub>136</sub> O <sub>12</sub> | [M] <sup>+</sup> | 1445.0027    | 1445.0021 | 0.4152     |

4512 #86 RT: 0.60 AV: 1 NL: 1.13E5  
T: FTMS + p ESI Full ms [150.00-2000.00]

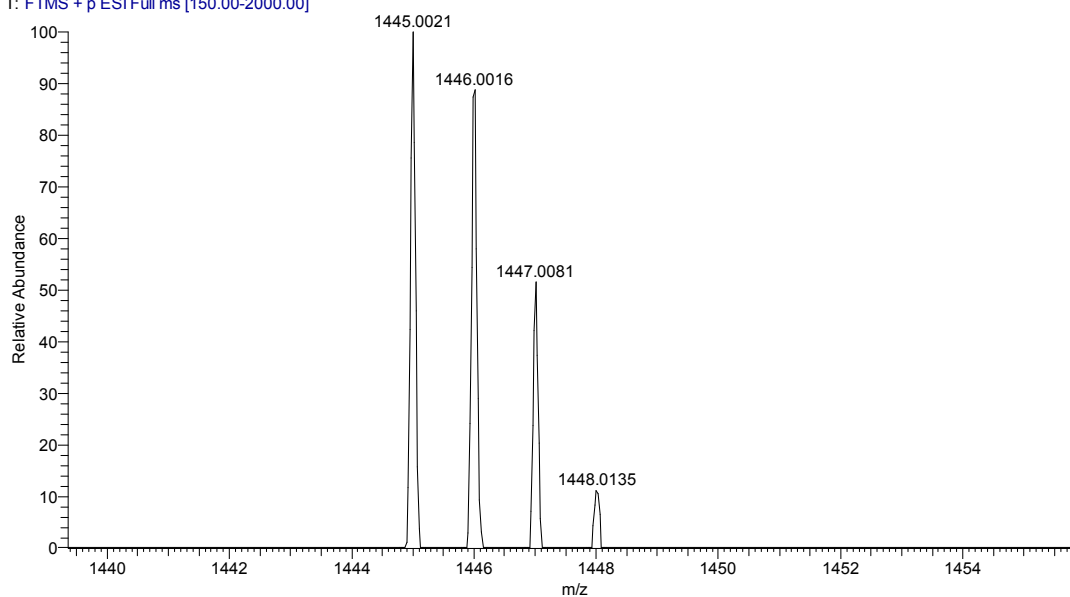

Fig.S42 HRMS spectra of T<sub>4,5</sub>D<sub>12</sub>



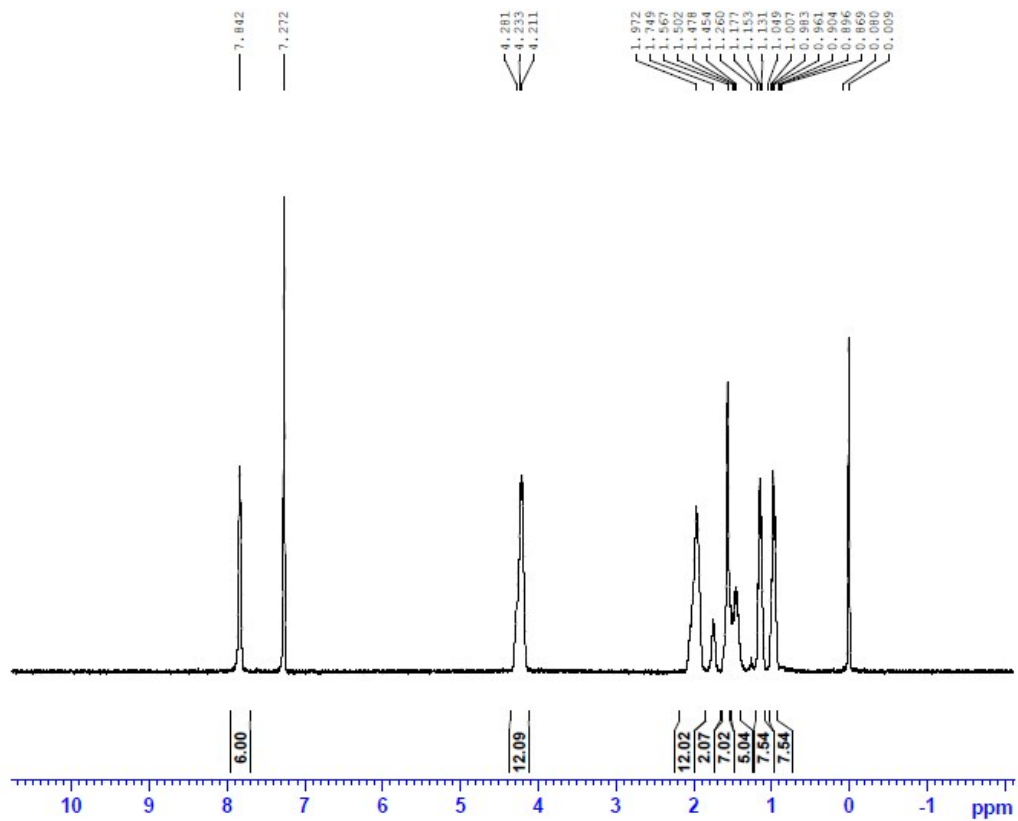

Fig.S43 <sup>1</sup>H NMR spectra of T<sub>3,5</sub>D<sub>6</sub>

| Sample No. | Formula (M)                                      | Ion Formula      | Measured m/z | Calc m/z  | Diff (ppm) |
|------------|--------------------------------------------------|------------------|--------------|-----------|------------|
| 356        | C <sub>82</sub> H <sub>114</sub> O <sub>12</sub> | [M] <sup>+</sup> | 1290.8305    | 1290.8307 | -0.1549    |

356 #93 RT: 0.65 AV: 1 NL: 5.65E7  
T: FTMS + p ESI Full ms [150.00-2000.00]

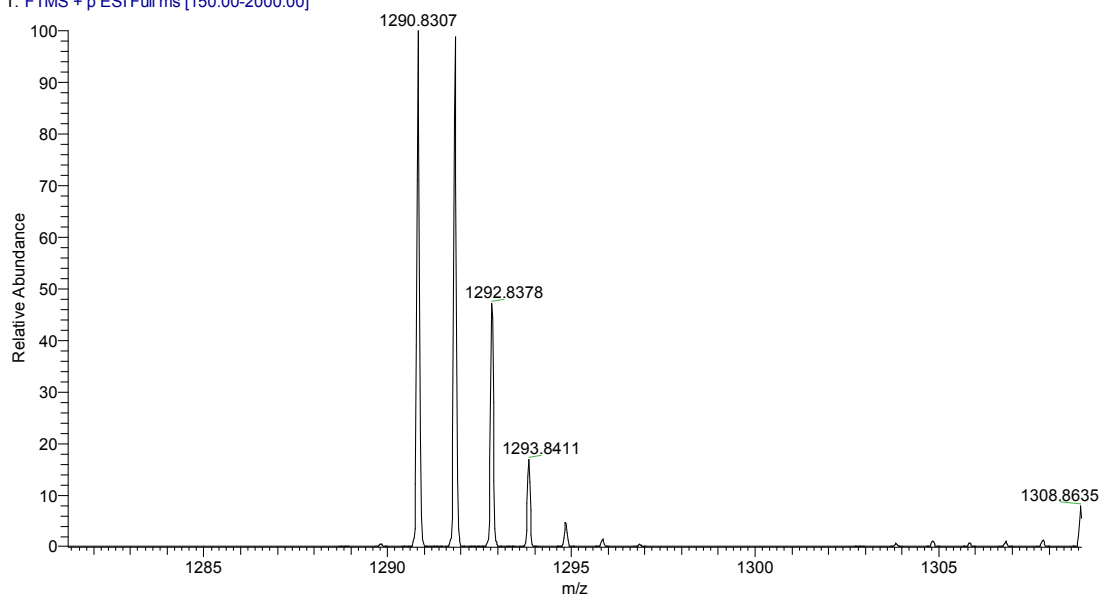

Fig.S44 HRMS spectra of T<sub>3,5</sub>D<sub>6</sub>

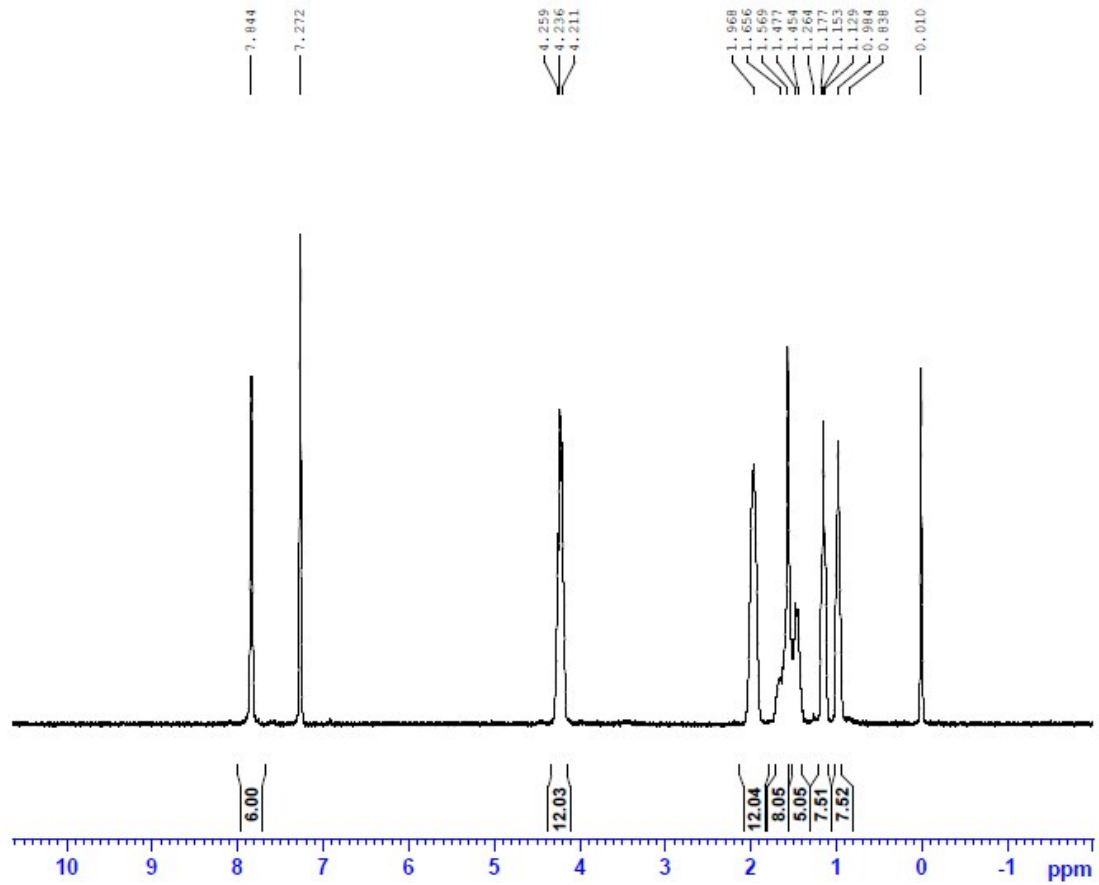

Fig.S45 <sup>1</sup>H NMR spectra of T<sub>3,5</sub>D<sub>7</sub>

| Sample No. | Formula (M)                                      | Ion Formula      | Measured m/z | Calc m/z  | Diff (ppm) |
|------------|--------------------------------------------------|------------------|--------------|-----------|------------|
| 357        | C <sub>83</sub> H <sub>116</sub> O <sub>12</sub> | [M] <sup>+</sup> | 1304.8461    | 1304.8462 | -0.0766    |

357 #112 RT: 0.78 AV: 1 NL: 4.46E6  
T: FTMS + p ESI Full ms [150.00-2000.00]

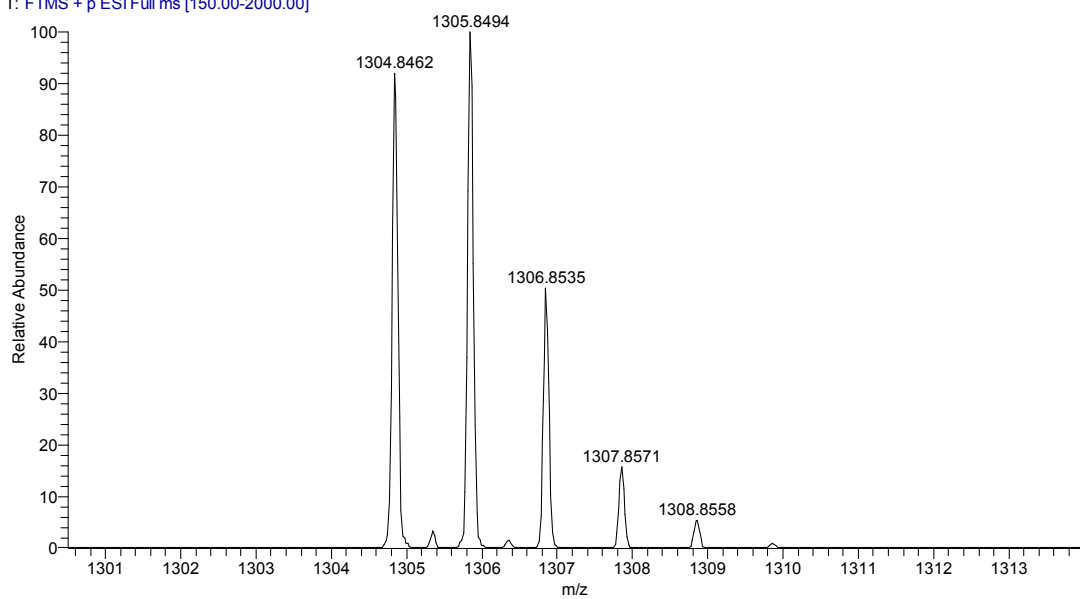

Fig.S46 HRMS spectra of T<sub>3,5</sub>D<sub>7</sub>

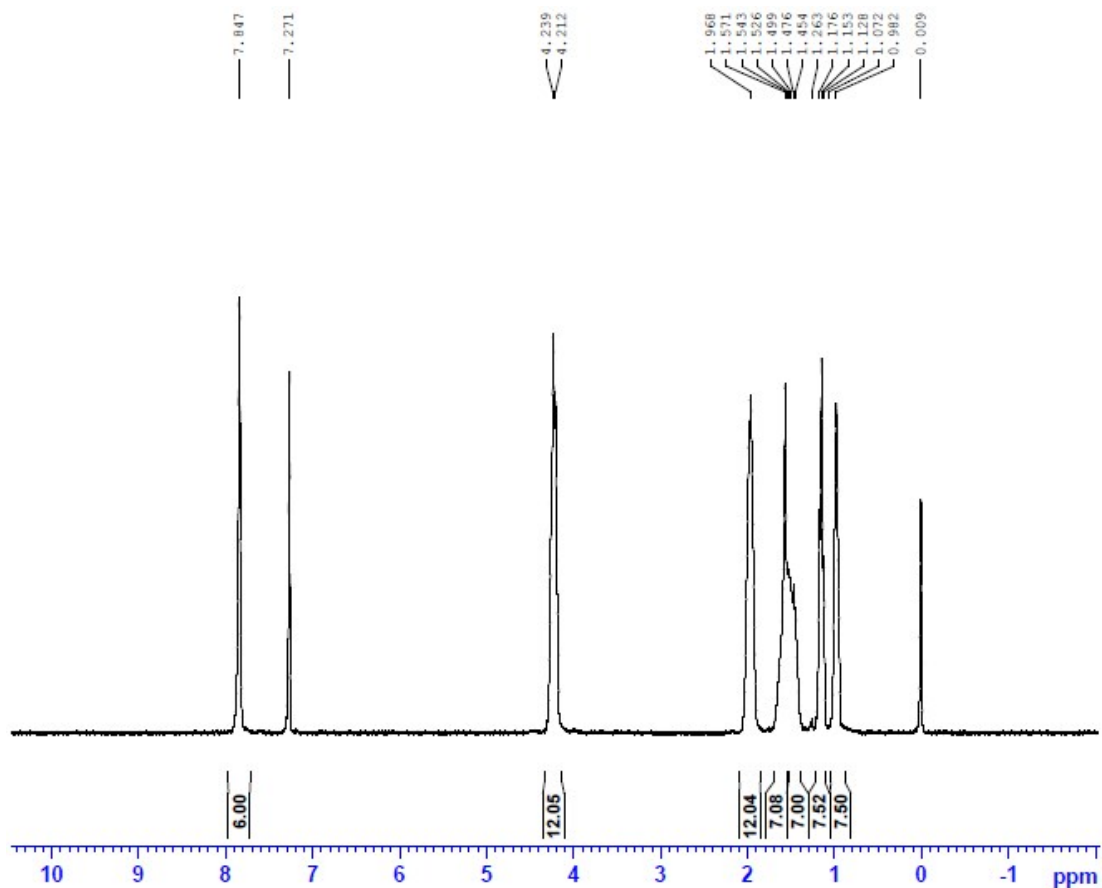

Fig.S47 <sup>1</sup>H NMR spectra of T<sub>3,5</sub>D<sub>8</sub>

| Sample No. | Formula (M)                                      | Ion Formula      | Measured m/z | Calc m/z  | Diff (ppm) |
|------------|--------------------------------------------------|------------------|--------------|-----------|------------|
| 358        | C <sub>84</sub> H <sub>118</sub> O <sub>12</sub> | [M] <sup>+</sup> | 1318.8618    | 1318.8608 | 0.7582     |

358 #68 RT: 0.48 AV: 1 NL: 8.16E7  
T: FTMS + p ESI Full ms [150.00-2000.00]

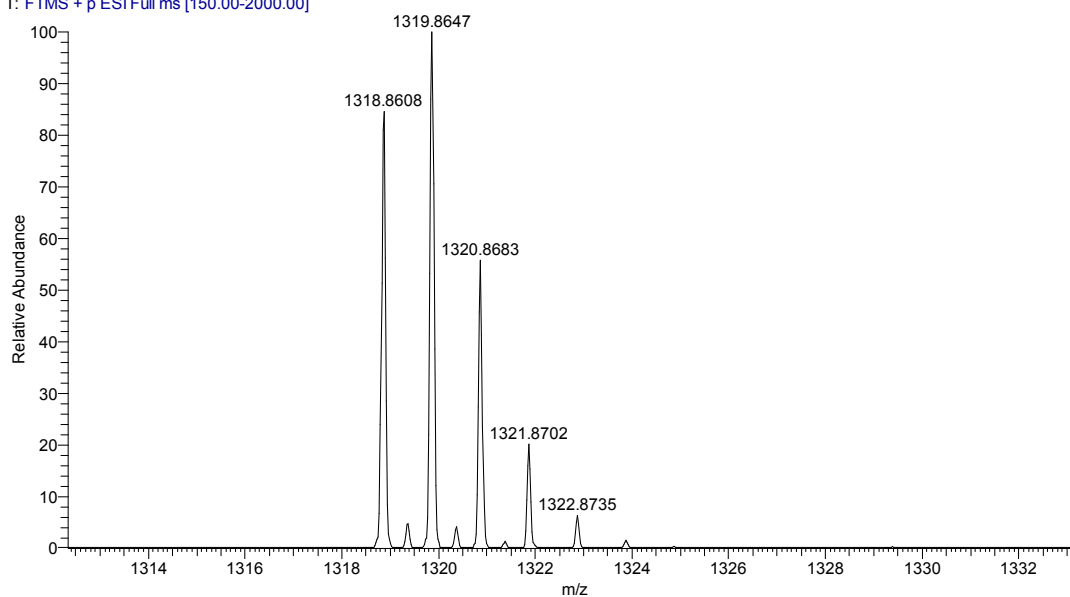

Fig.S48 HRMS spectra of T<sub>3,5</sub>D<sub>8</sub>

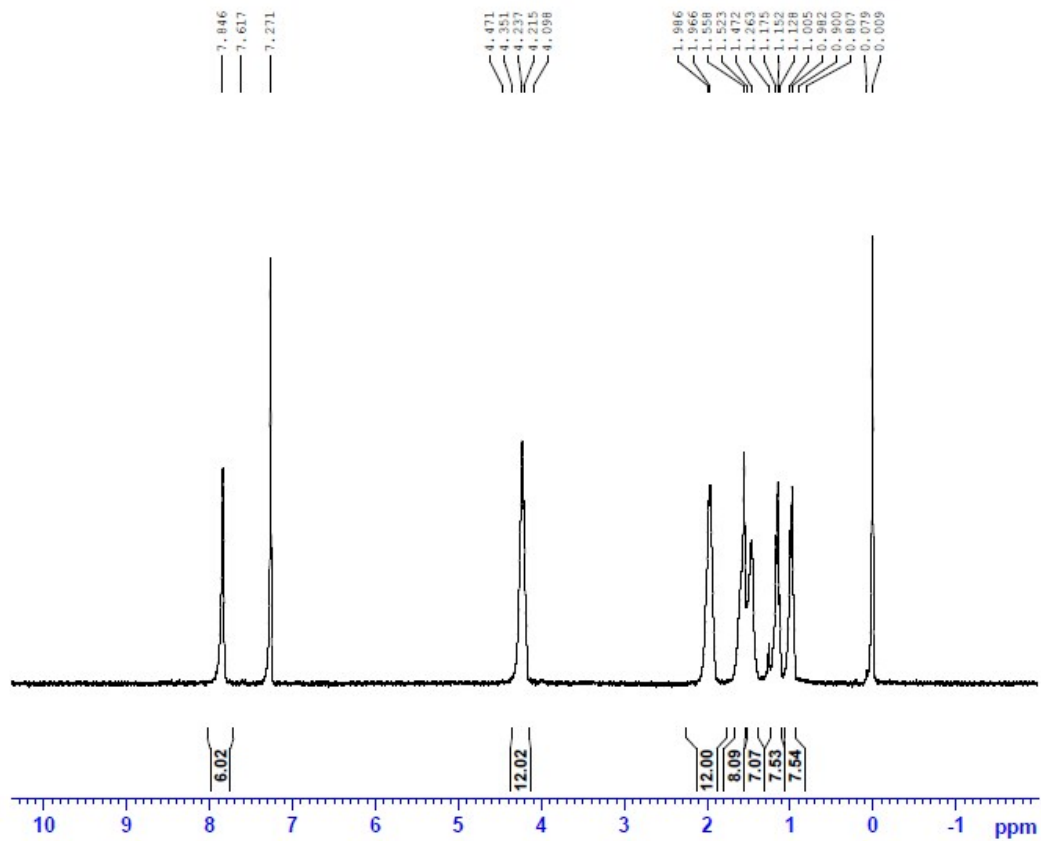

Fig.S49 <sup>1</sup>H NMR spectra of T<sub>3,5</sub>D<sub>9</sub>

| Sample No. | Formula (M)                                      | Ion Formula      | Measured m/z | Calc m/z  | Diff (ppm) |
|------------|--------------------------------------------------|------------------|--------------|-----------|------------|
| 359        | C <sub>85</sub> H <sub>120</sub> O <sub>12</sub> | [M] <sup>+</sup> | 1332.8774    | 1332.8750 | 1.8006     |

359 #63 RT: 0.44 AV: 1 NL: 9.88E4  
T: FTMS + p ESI Full ms [150.00-2000.00]

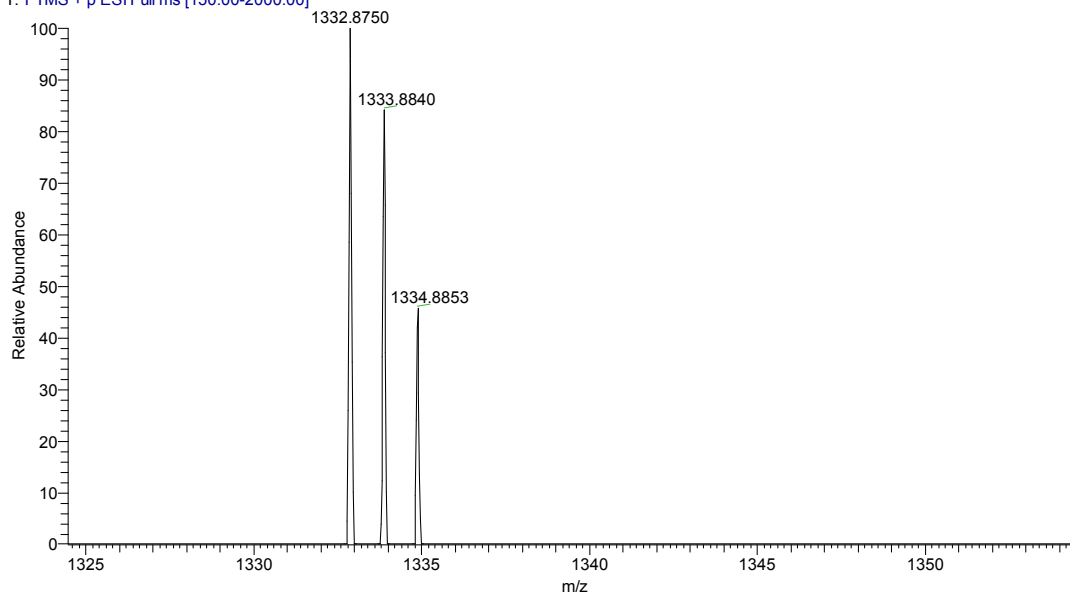

Fig.S50 HRMS spectra of T<sub>3,5</sub>D<sub>9</sub>

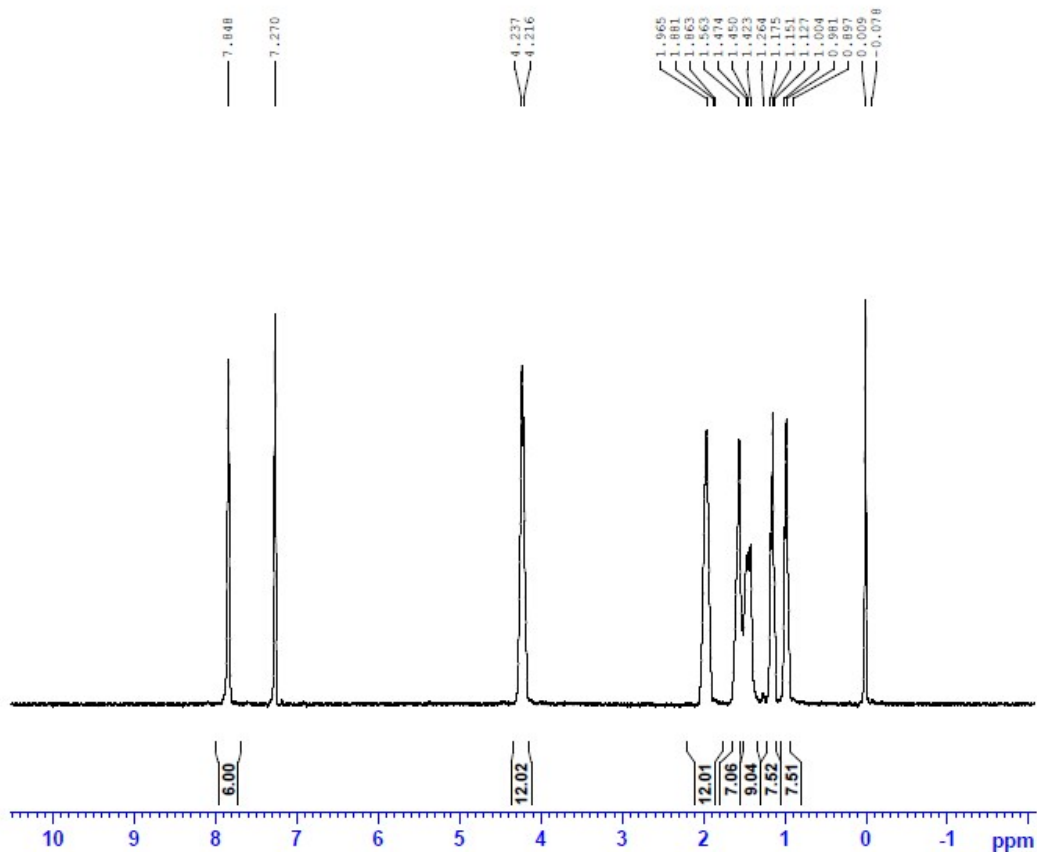

Fig.S51 <sup>1</sup>H NMR spectra of T<sub>3,5</sub>D<sub>10</sub>

| Sample No. | Formula (M)                                      | Ion Formula      | Measured m/z | Calc m/z  | Diff (ppm) |
|------------|--------------------------------------------------|------------------|--------------|-----------|------------|
| 3510       | C <sub>86</sub> H <sub>122</sub> O <sub>12</sub> | [M] <sup>+</sup> | 1346.8931    | 1346.8938 | -0.5197    |

3510 #156 RT: 1.09 AV: 1 NL: 1.41E7  
T: FTMS + p ESI Full ms [150.00-2000.00]

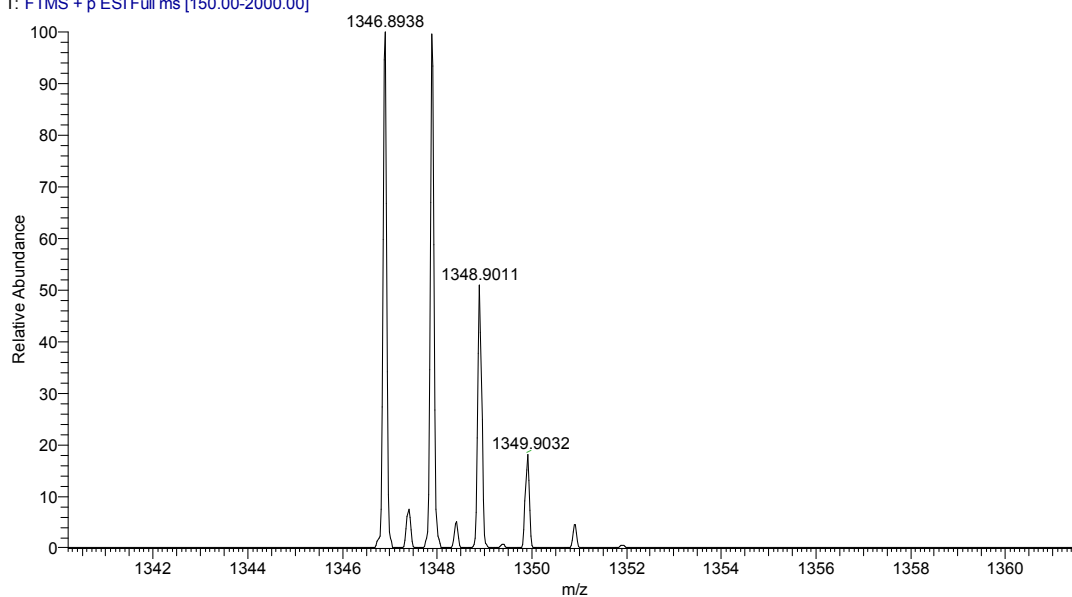

Fig.S52 HRMS spectra of T<sub>3,5</sub>D<sub>10</sub>

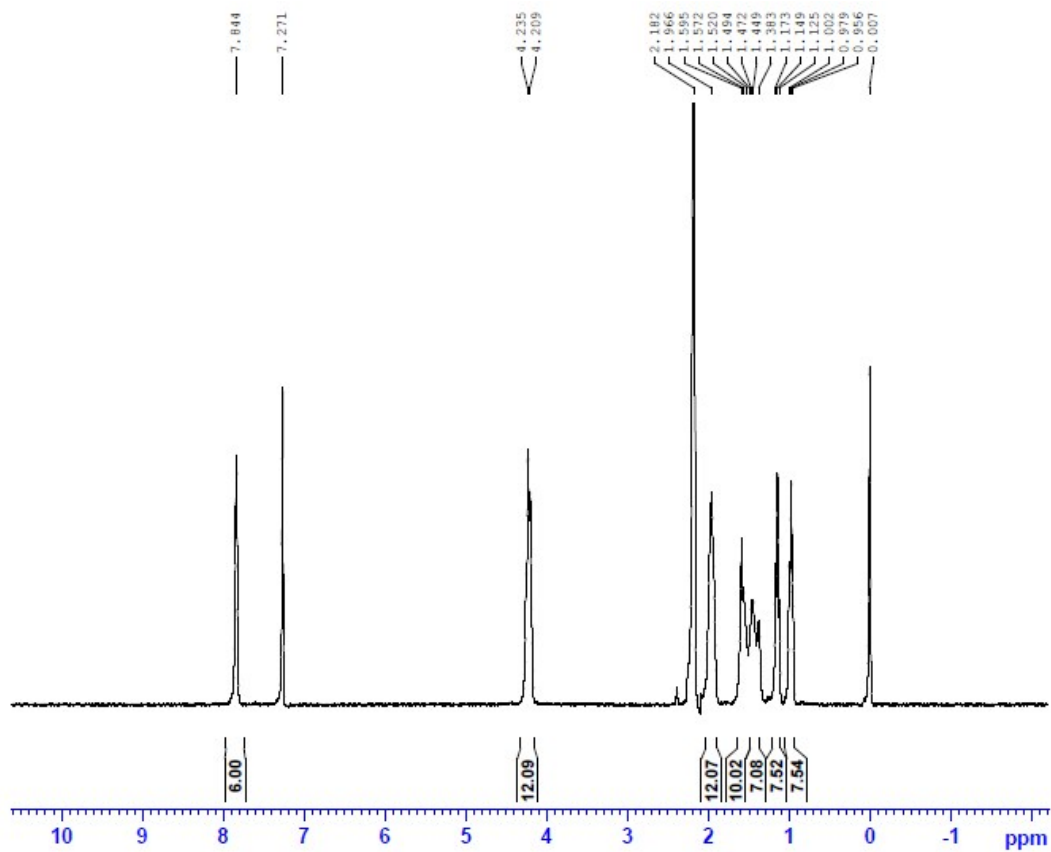

Fig.S53 <sup>1</sup>H NMR spectra of T<sub>3,5</sub>D<sub>11</sub>

| Sample No. | Formula (M)                                      | Ion Formula      | Measured m/z | Calc m/z  | Diff (ppm) |
|------------|--------------------------------------------------|------------------|--------------|-----------|------------|
| 3511       | C <sub>87</sub> H <sub>124</sub> O <sub>12</sub> | [M] <sup>+</sup> | 1360.9087    | 1360.9083 | 0.2939     |

3511 #126 RT: 0.88 AV: 1 NL: 5.73E6  
T: FTMS + p ESI Full ms [150.00-2000.00]

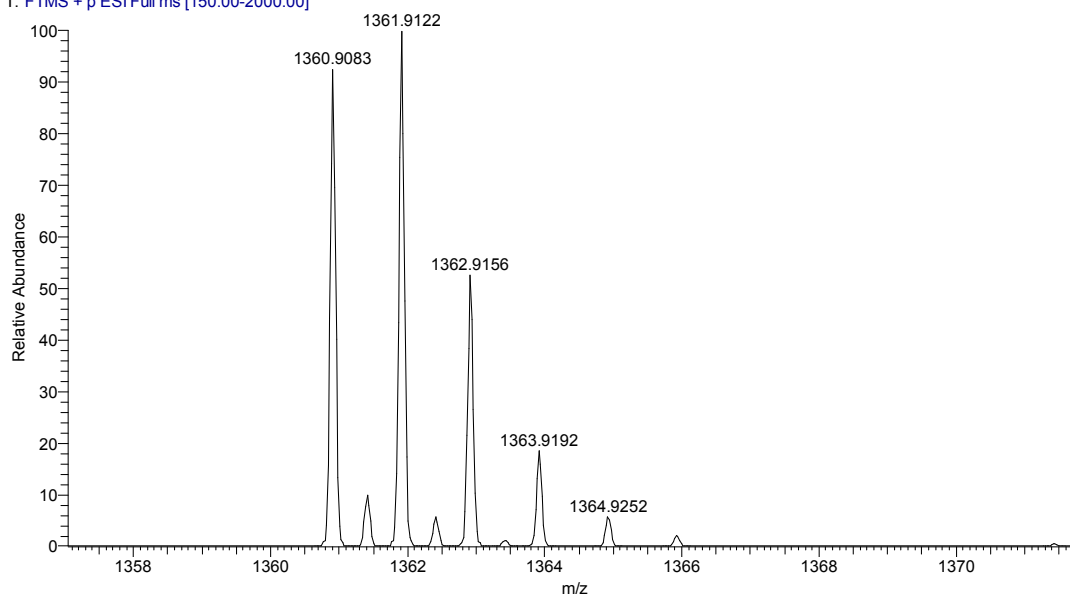

Fig.S54 HRMS spectra of T<sub>3,5</sub>D<sub>11</sub>

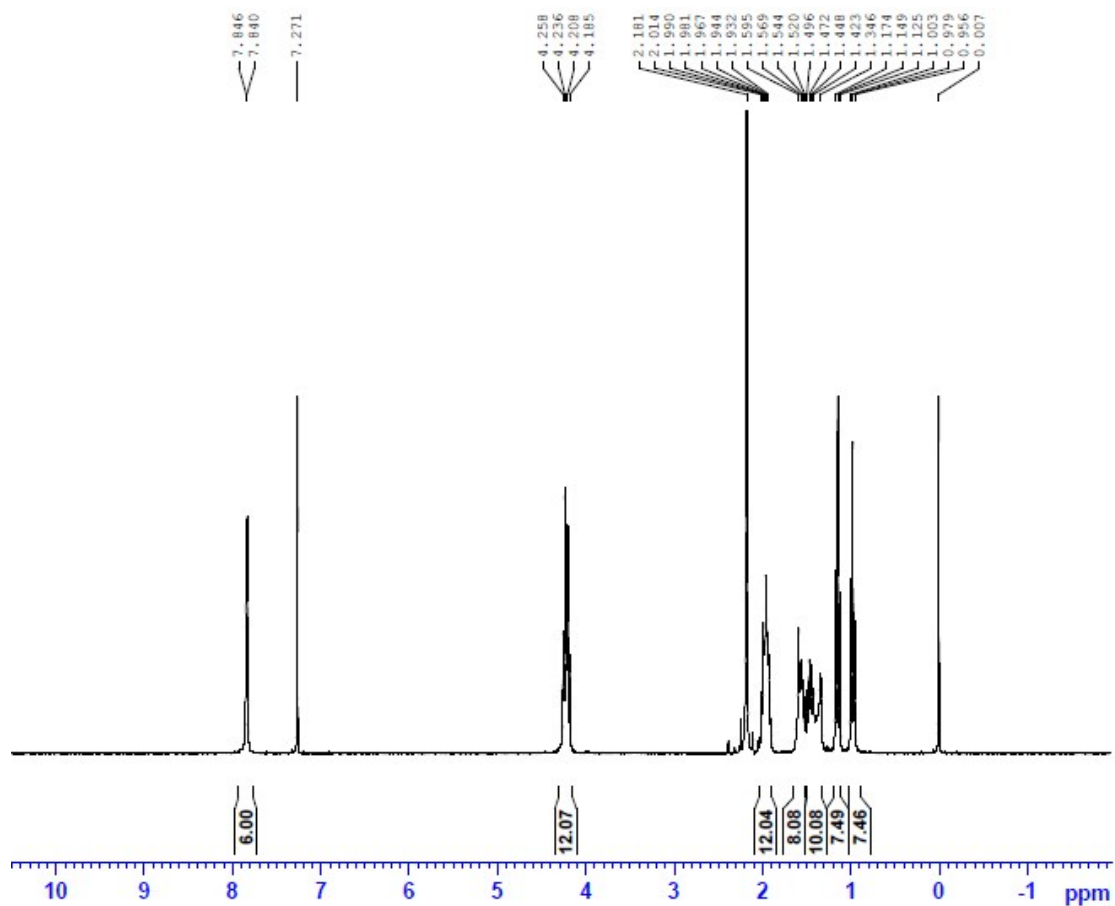

Fig.S55 <sup>1</sup>H NMR spectra of T<sub>3,5</sub>D<sub>12</sub>

| Sample No. | Formula (M)                                      | Ion Formula      | Measured m/z | Calc m/z  | Diff (ppm) |
|------------|--------------------------------------------------|------------------|--------------|-----------|------------|
| 3512       | C <sub>88</sub> H <sub>126</sub> O <sub>12</sub> | [M] <sup>+</sup> | 1374.9244    | 1374.9247 | -0.2182    |

35112 #89 RT: 0.62 AV: 1 NL: 2.46E7  
T: FTMS + p ESI Full ms [150.00-2000.00]

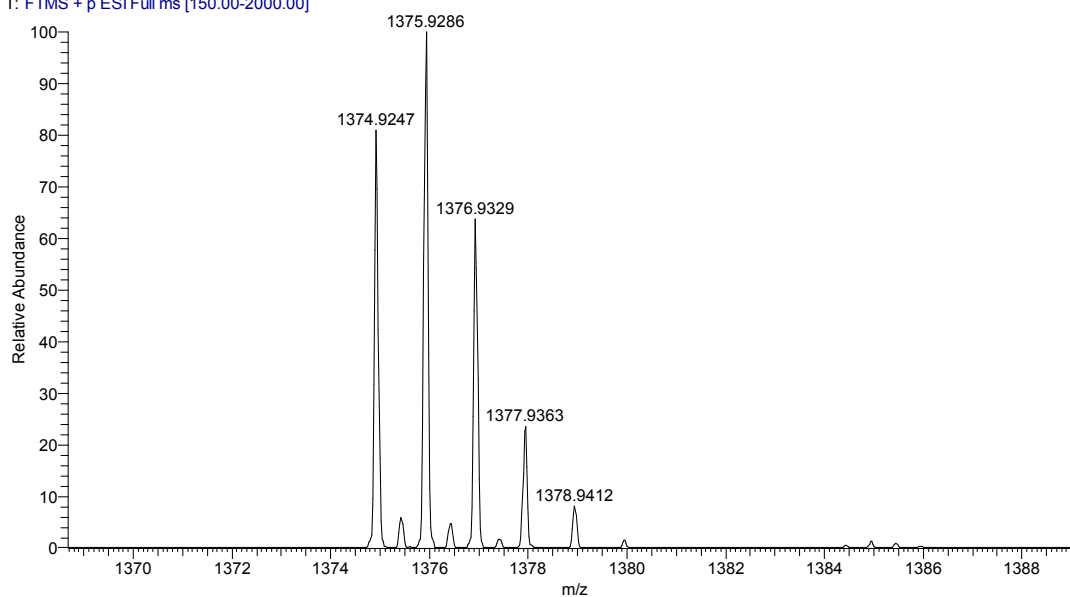

Fig.S56 HRMS spectra of T<sub>3,5</sub>D<sub>12</sub>

# Mesomorphism

## 1. POM and DSC

### Mesomorphism of T<sub>3,4</sub>D<sub>6</sub>

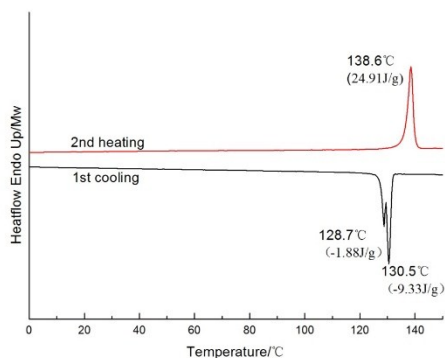

Fig.S57 DSC trace of compound T<sub>3,4</sub>D<sub>6</sub> run at 10°Cmin<sup>-1</sup> under N<sub>2</sub>.

### Mesomorphism of T<sub>3,4</sub>D<sub>7</sub>

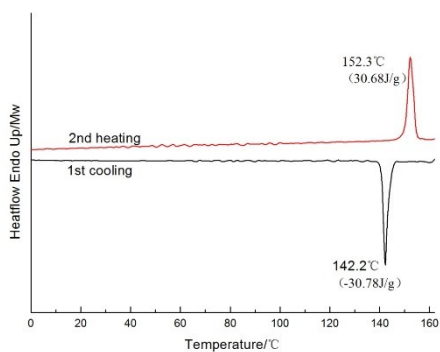

Fig.S58 DSC trace of compound T<sub>3,4</sub>D<sub>7</sub> run at 10°Cmin<sup>-1</sup> under N<sub>2</sub>.

### Mesomorphism of T<sub>3,4</sub>D<sub>8</sub>

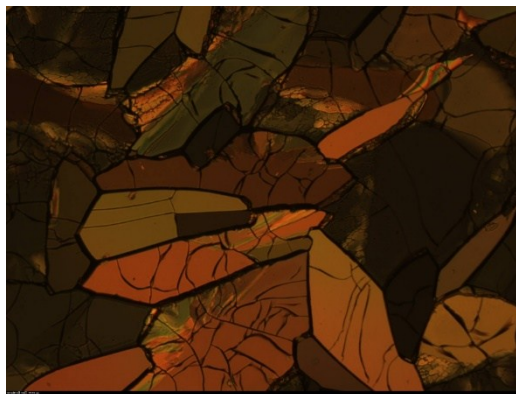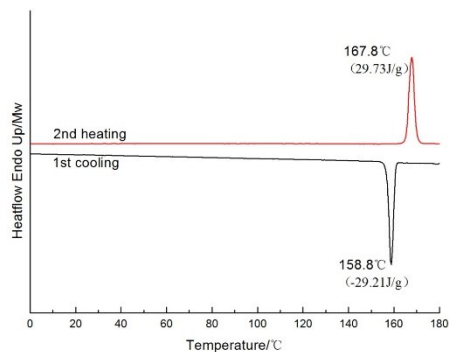

Fig.S59 Mosaic texture observed by POM with of compound T<sub>3,4</sub>D<sub>8</sub> sandwiched between clean glass slides on cooling from isotropic phase at 30°C(left); DSC trace of compound T<sub>3,4</sub>D<sub>8</sub> run at 10°Cmin<sup>-1</sup> under N<sub>2</sub>(right).



### Mesomorphism of T<sub>3,4</sub>D<sub>9</sub>

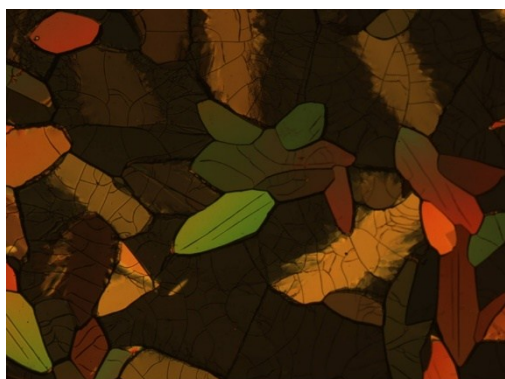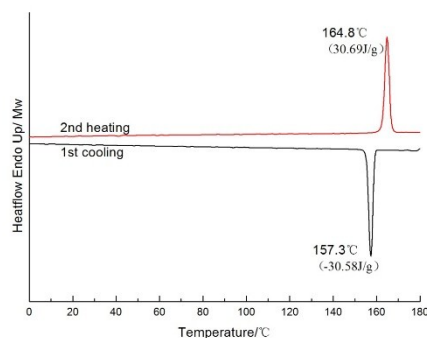

**Fig.S60** Mosaic texture observed by POM with of compound T<sub>3,4</sub>D<sub>9</sub> sandwiched between clean glass slides on cooling from isotropic phase at 30°C(left); DSC trace of compound T<sub>3,4</sub>D<sub>9</sub> run at 10°Cmin<sup>-1</sup> under N<sub>2</sub>(right).

### Mesomorphism of T<sub>3,4</sub>D<sub>10</sub>

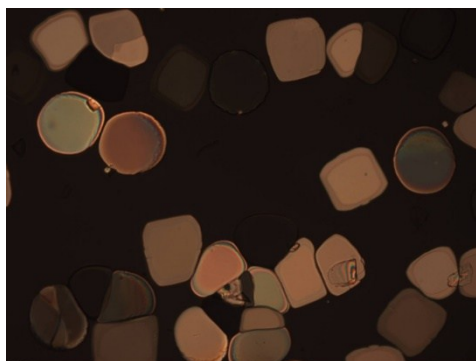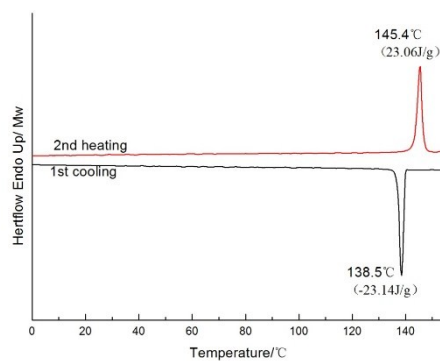

**Fig.S61** Mosaic texture observed by POM with of compound T<sub>3,4</sub>D<sub>10</sub> sandwiched between clean glass slides on cooling from isotropic phase at 146°C(left); DSC trace of compound T<sub>3,4</sub>D<sub>10</sub> run at 10°Cmin<sup>-1</sup> under N<sub>2</sub>(right).

### Mesomorphism of T<sub>3,4</sub>D<sub>11</sub>

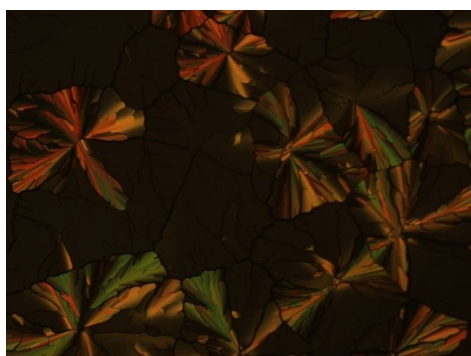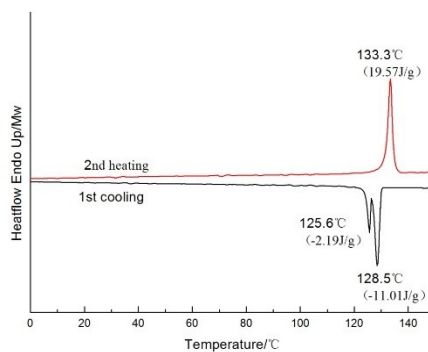

**Fig.S62** Fan-shaped texture observed by POM with of compound T<sub>3,4</sub>D<sub>11</sub> sandwiched between clean glass slides on cooling from isotropic phase at 25°C(left); DSC trace of compound T<sub>3,4</sub>D<sub>11</sub> run at 10°Cmin<sup>-1</sup> under N<sub>2</sub>(right).

### Mesomorphism of T<sub>3,4</sub>D<sub>12</sub>

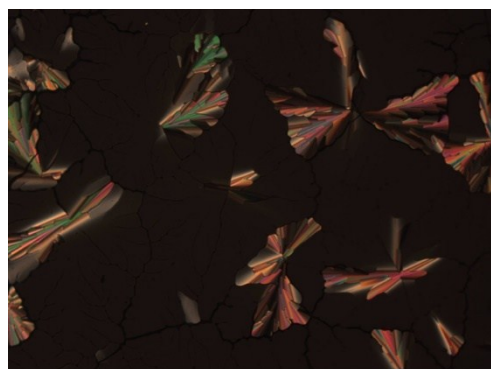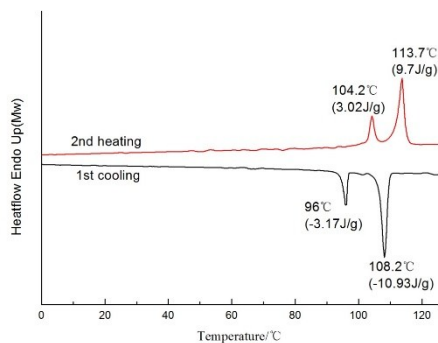

**Fig.S63** Fan-shaped texture observed by POM with of compound T<sub>3,4</sub>D<sub>12</sub> sandwiched between clean glass slides on cooling from isotropic phase at 30°C(left); DSC trace of compound T<sub>3,4</sub>D<sub>12</sub> run at 10°Cmin<sup>-1</sup> under N<sup>2</sup>(right).

### Mesomorphism of T<sub>4,5</sub>D<sub>6</sub>

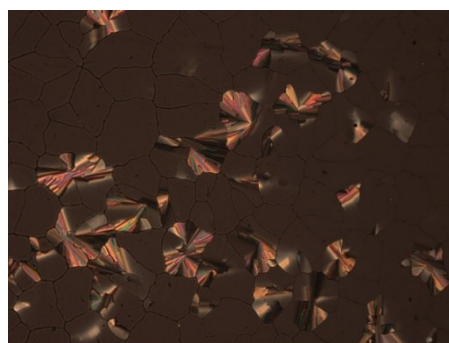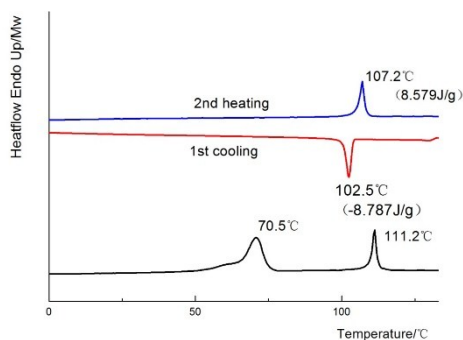

**Fig.S64** Fan-shaped texture observed by POM of compound T<sub>4,5</sub>D<sub>6</sub> sandwiched between clean glass slides on cooling from isotropic phase at 100°C(left); DSC trace of compound T<sub>4,5</sub>D<sub>6</sub> run at 10°Cmin<sup>-1</sup> under N<sup>2</sup>(right).

### Mesomorphism of T<sub>4,5</sub>D<sub>7</sub>

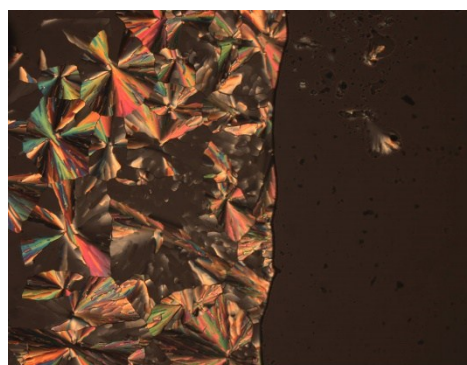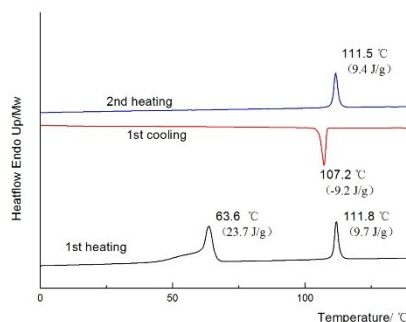

**Fig.S65** Fan-shaped texture observed by POM of compound T<sub>4,5</sub>D<sub>7</sub> sandwiched between clean glass slides on cooling from isotropic phase at 90°C(left); DSC trace of compound T<sub>4,5</sub>D<sub>7</sub> run at 10°Cmin<sup>-1</sup> under N<sup>2</sup>(right).

### Mesomorphism of T<sub>4,5</sub>D<sub>8</sub>

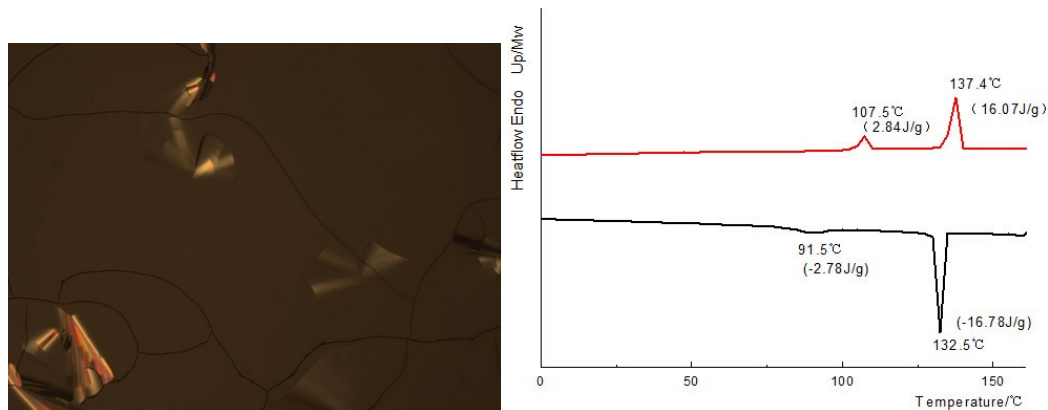

**Fig.S66** Fan-shaped texture observed by POM of compound T<sub>4,5</sub>D<sub>8</sub> sandwiched between clean glass slides on cooling from isotropic phase at 30°C(left); DSC trace of compound T<sub>4,5</sub>D<sub>8</sub> run at 10°Cmin<sup>-1</sup> under N<sub>2</sub>(right).

### Mesomorphism of T<sub>4,5</sub>D<sub>9</sub>

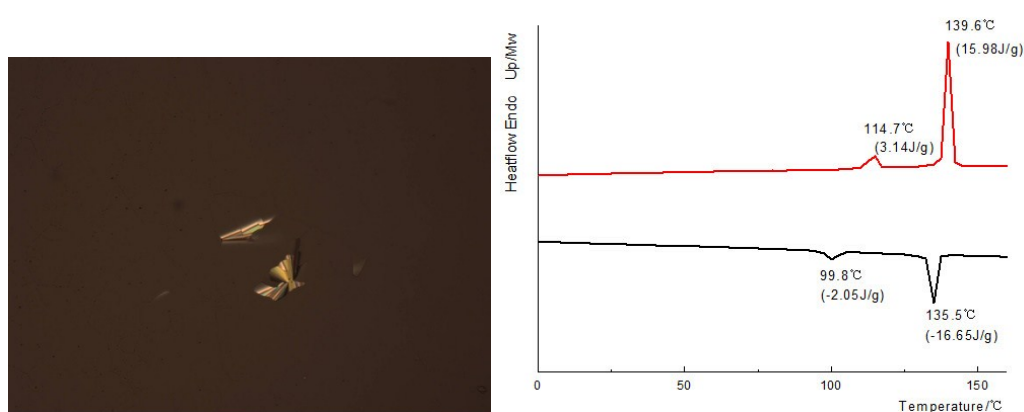

**Fig.S67** Fan-shaped texture observed by POM of compound T<sub>4,5</sub>D<sub>9</sub> sandwiched between clean glass slides on cooling from isotropic phase at 110°C(left); DSC trace of compound T<sub>4,5</sub>D<sub>9</sub> run at 10°Cmin<sup>-1</sup> under N<sub>2</sub>(right).

### Mesomorphism of T<sub>4,5</sub>D<sub>10</sub>

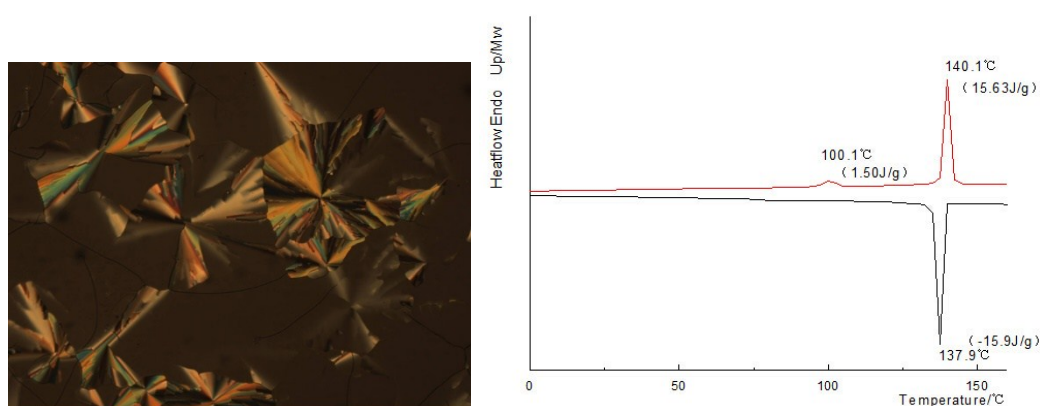

**Fig.S68** Fan-shaped texture observed by POM of compound T<sub>4,5</sub>D<sub>10</sub> sandwiched between clean glass slides on cooling from isotropic phase at 25°C(left); DSC trace of compound T<sub>4,5</sub>D<sub>10</sub> run at 10°Cmin<sup>-1</sup> under N<sub>2</sub>(right).

### Mesomorphism of T<sub>4,5</sub>D<sub>11</sub>

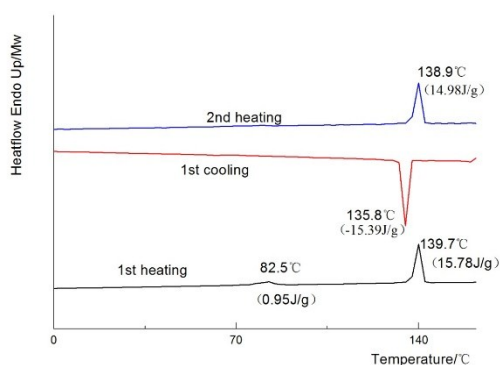

**Fig.S69** DSC trace of compound  $T_{4,5}D_{11}$  run at  $10^{\circ}Cmin^{-1}$  under  $N_2$ .

### Mesomorphism of $T_{4,5}D_{12}$

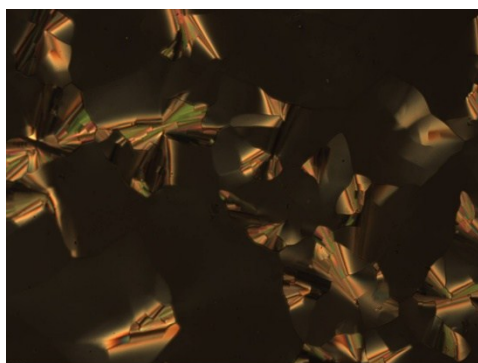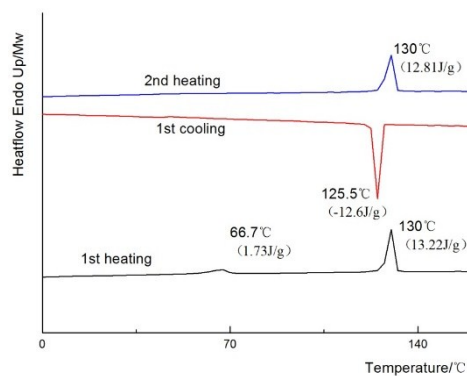

**Fig.S70** Fan-shaped texture observed by POM of compound  $T_{4,5}D_{12}$  sandwiched between clean glass slides on cooling from isotropic phase at  $30^{\circ}C$ (left); DSC trace of compound  $T_{4,5}D_{12}$  run at  $10^{\circ}Cmin^{-1}$  under  $N_2$ (right).

### Mesomorphism of $T_{3,5}D_6$

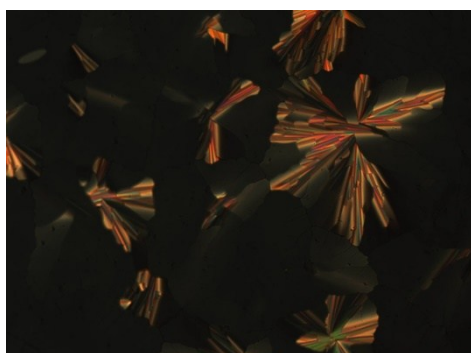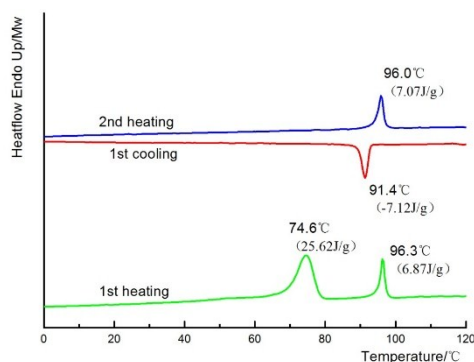

**Fig.S71** Fan-shaped texture observed by POM of compound  $T_{3,5}D_6$  sandwiched between clean glass slides on cooling from isotropic phase at  $40^{\circ}C$ (left); DSC trace of compound  $T_{3,5}D_6$  run at  $10^{\circ}Cmin^{-1}$  under  $N_2$ (right).

### Mesomorphism of T<sub>3,5</sub>D<sub>7</sub>

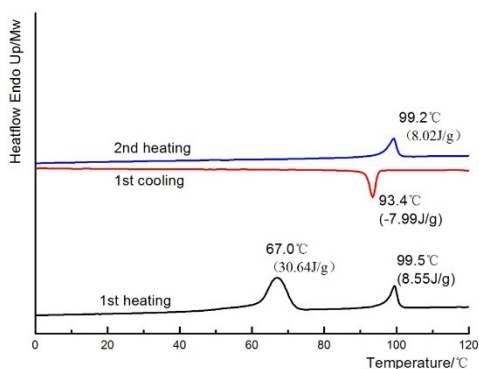

Fig.S72 DSC trace of compound T<sub>3,5</sub>D<sub>7</sub> run at 10°Cmin<sup>-1</sup> under N<sub>2</sub>.

### Mesomorphism of T<sub>3,5</sub>D<sub>8</sub>

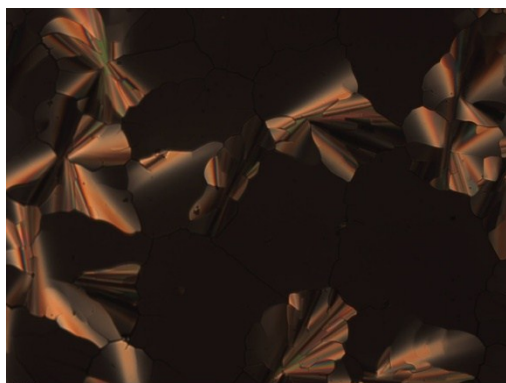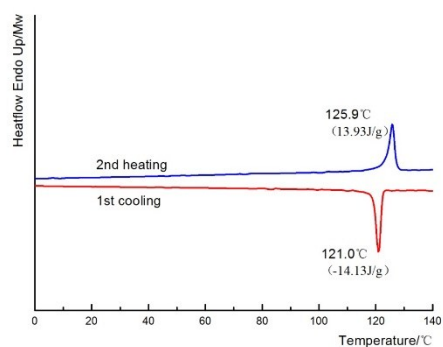

Fig.S73 Fan-shaped texture observed by POM of compound T<sub>3,5</sub>D<sub>8</sub> sandwiched between clean glass slides on cooling from isotropic phase at 40°C(left); DSC trace of compound T<sub>3,5</sub>D<sub>8</sub> run at 10°Cmin<sup>-1</sup> under N<sub>2</sub>(right).

### Mesomorphism of T<sub>3,5</sub>D<sub>9</sub>

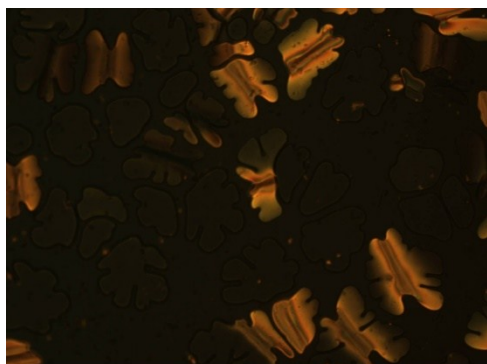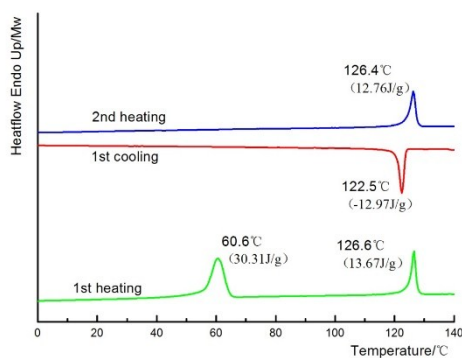

Fig.S74 Dendritic texture observed by POM of compound T<sub>3,5</sub>D<sub>9</sub> sandwiched between clean glass slides on cooling from isotropic phase at 128°C(left); DSC trace of compound T<sub>3,5</sub>D<sub>9</sub> run at 10°Cmin<sup>-1</sup> under N<sub>2</sub>(right).

### Mesomorphism of T<sub>3,5</sub>D<sub>10</sub>

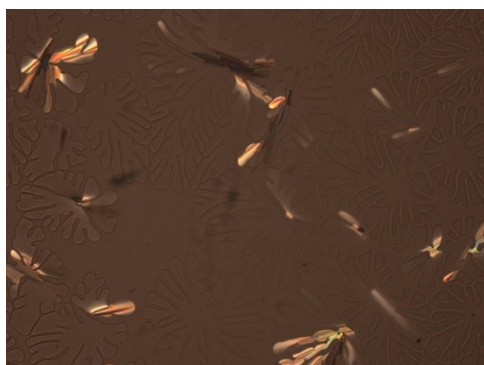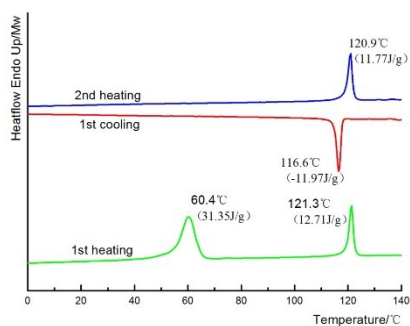

**Fig.S75** Dendritic texture observed by POM of compound  $T_{3,5}D_{10}$  sandwiched between clean glass slides on cooling from isotropic phase at  $122^{\circ}\text{C}$ (left); DSC trace of compound  $T_{3,5}D_{10}$  run at  $10^{\circ}\text{Cmin}^{-1}$  under  $\text{N}^2$ (right).

### Mesomorphism of $T_{3,5}D_{11}$

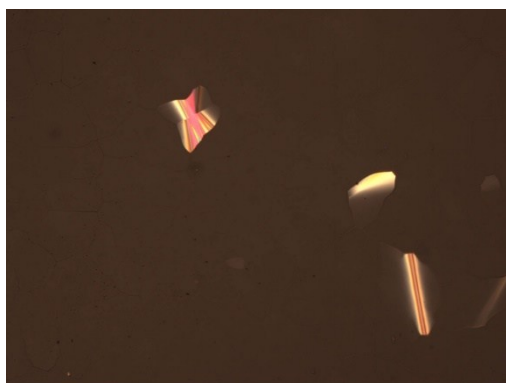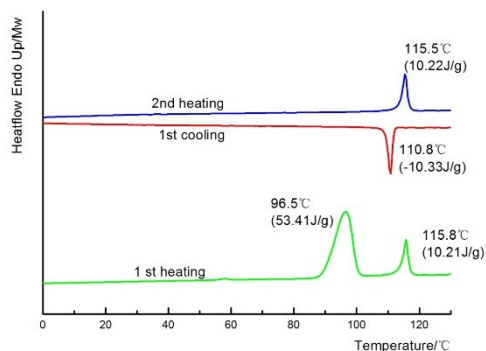

**Fig.S76** Dendritic texture observed by POM of compound  $T_{3,5}D_{11}$  sandwiched between clean glass slides on cooling from isotropic phase at  $35^{\circ}\text{C}$ (left); DSC trace of compound  $T_{3,5}D_{11}$  run at  $10^{\circ}\text{Cmin}^{-1}$  under  $\text{N}^2$ (right).

### Mesomorphism of $T_{3,5}D_{12}$

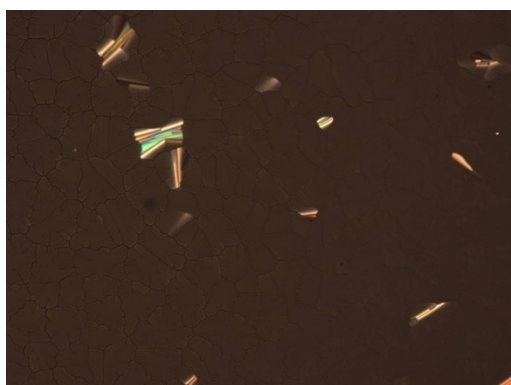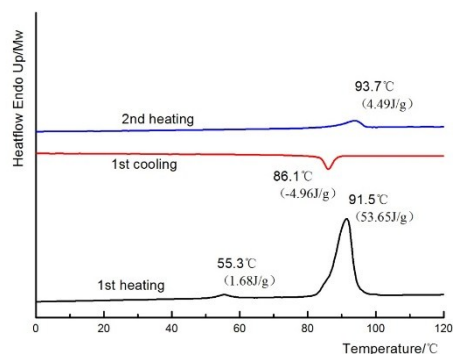

**Fig.S77** Dendritic texture observed by POM of compound  $T_{3,5}D_{12}$  sandwiched between clean glass slides on cooling from isotropic phase at  $36^{\circ}\text{C}$ (left); DSC trace of compound  $T_{3,5}D_{12}$  run at  $10^{\circ}\text{Cmin}^{-1}$  under  $\text{N}^2$ (right).

## 2. 1D WAXD

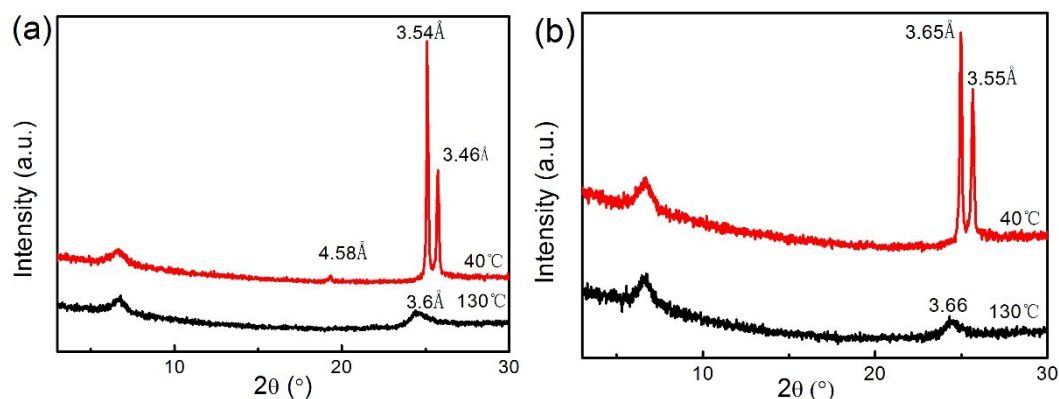

**Fig.S78** (a) 1D WAXD of  $T_{3,4}D_{11}$  at 130°C and 40°C during the first cooling runs; (b) 1D WAXD of  $T_{3,4}D_6$  at 130°C and 40°C during the first cooling runs.

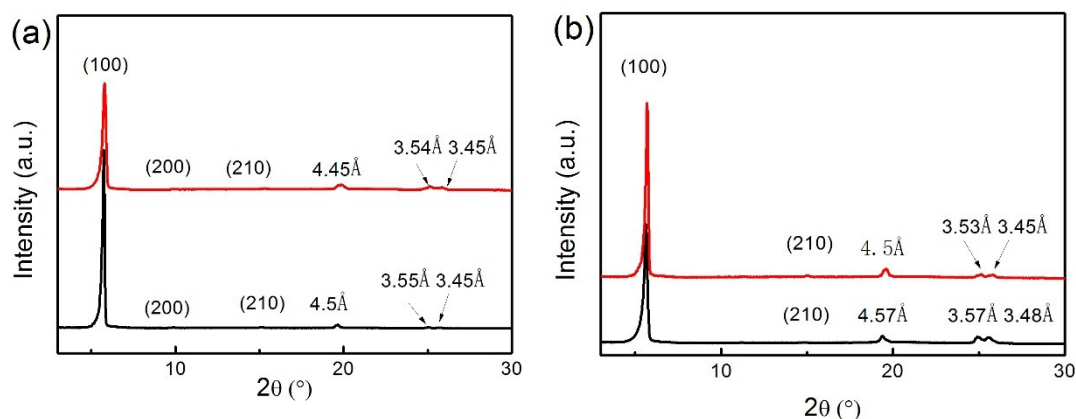

**Fig.S79** (a) 1D WAXD of  $T_{3,4}D_7$  at 90°C (red line) and  $T_{3,4}D_8$  at 95°C (black line) during the first heating runs; (b) 1D WAXD of  $T_{3,4}D_9$  at 95°C (red line) and  $T_{3,4}D_{10}$  at 90°C (black line) during the first heating runs.

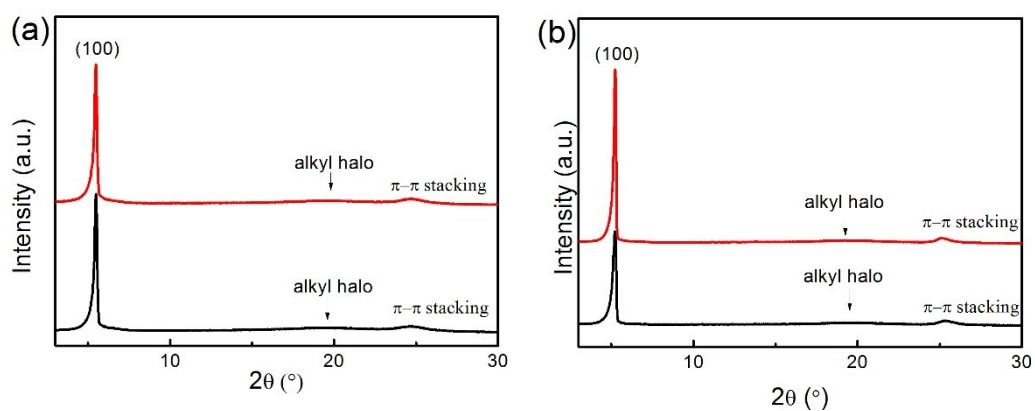

**Fig.S80** (a) 1D WAXD of  $T_{4,5}D_6$  at 90°C (red line) and  $T_{4,5}D_7$  at 100°C (black line) during the first heating runs; (b) 1D WAXD of  $T_{4,5}D_{11}$  at 90°C (red line) and  $T_{4,5}D_{12}$  at 80°C (black line) during the first heating runs.

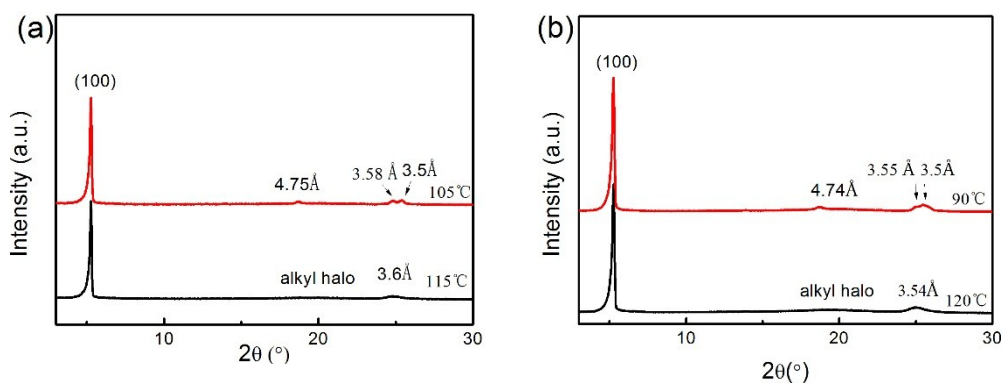

**Fig.S81** (a) 1D WAXD of  $T_{4,5}D_8$  at 105°C and 115°C during the first heating runs; (b) 1D WAXD of  $T_{4,5}D_{10}$  at 90°C and 120°C during the first heating runs.

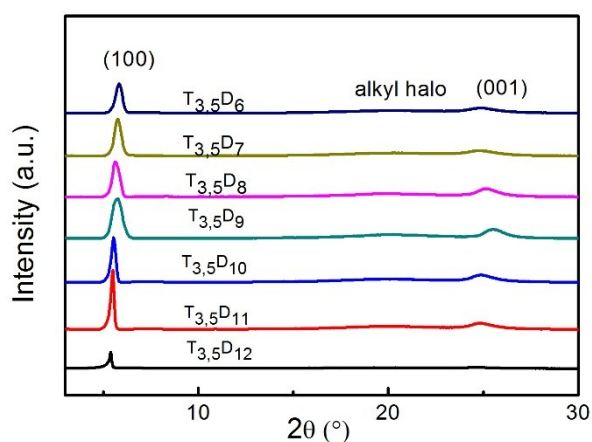

**Fig.S82** 1D WAXD of  $T_{3,5}D_m$  ( $m=6-12$ ) at 90°C during the first heating runs.

### 3. 2D WAXD

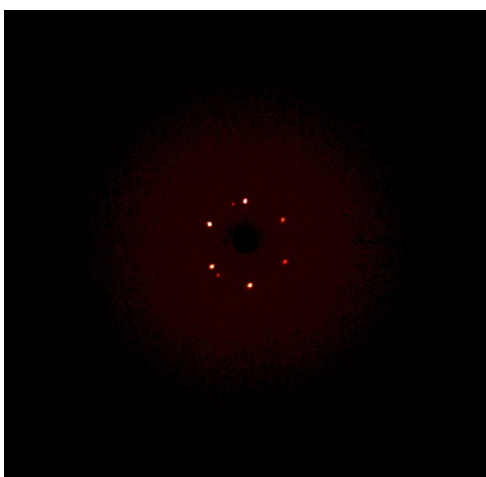

**Fig.S83** 2D WAXD of  $T_{3,5}D_6$  at 25°C



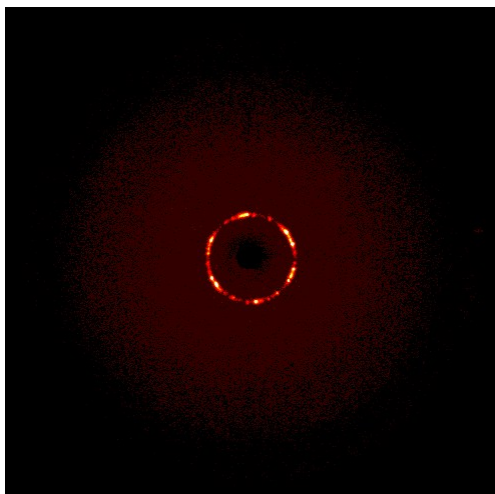

**Fig.S84** 2D WAXD of  $T_{3.5}D_7$  at 25°C (polydomain)

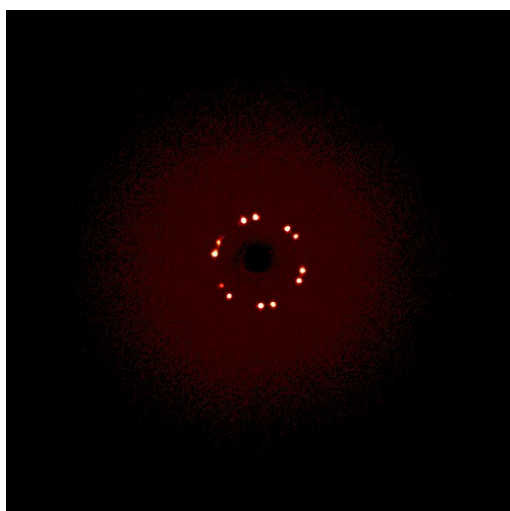

**Fig.S85** 2D WAXD of  $T_{3.5}D_8$  at 25°C

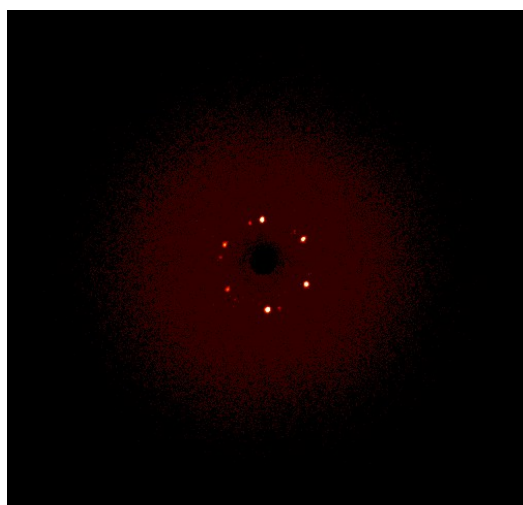

**Fig.S86** 2D WAXD of  $T_{3.5}D_9$  at 25°C

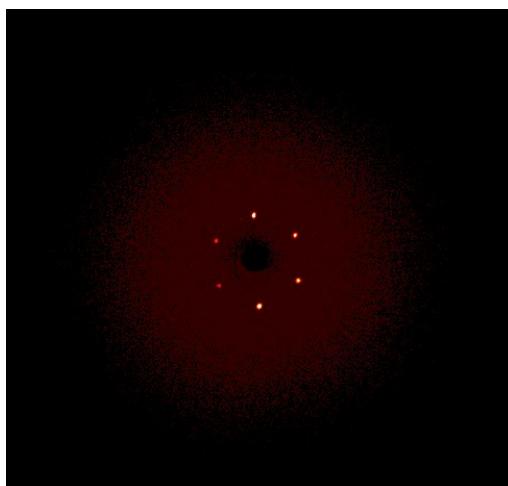

**Fig.S87** 2D WAXD of  $T_{3,5}D_{10}$  at 25°C

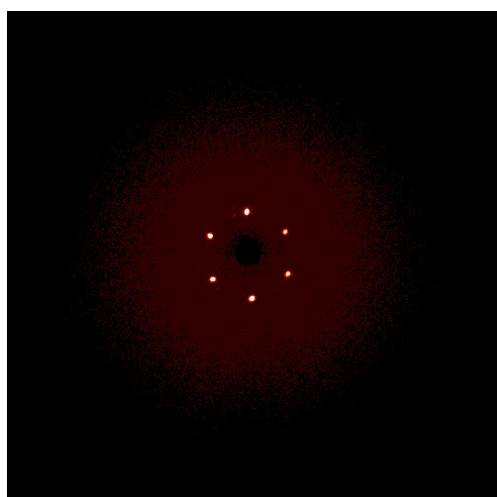

**Fig.S88** 2D WAXD of  $T_{3,5}D_{11}$  at 25°C

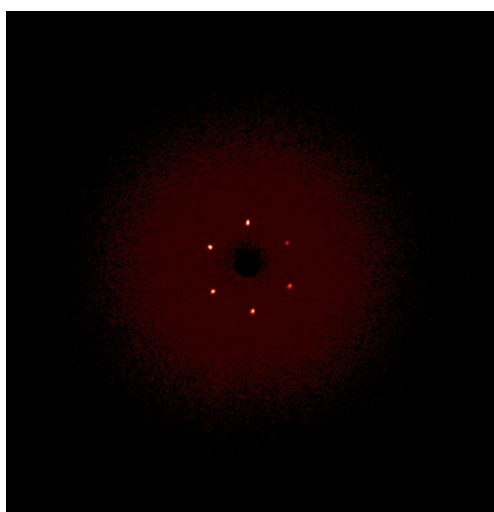

**Fig.S89** 2D WAXD of  $T_{3,5}D_{12}$  at 25°C

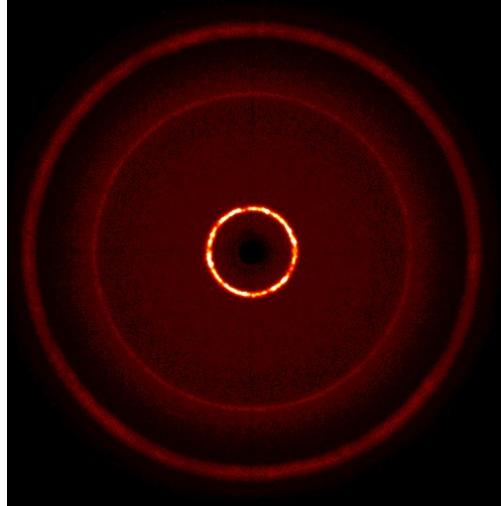

**Fig.S90** 2D WAXD of T<sub>3,4</sub>D<sub>7</sub> at 25°C
